# Supplementary material
Source: HighWire-hosted journal article supplement (https://rapm.bmj.com/content/rapm-2021-102750)

PNB versus no PNB for THA/TKA

23-Feb-2021

1 PNB vs NO-PNB

PNB versus no PNB for THA/TKA

23-Feb-2021

1.1 Mortality|GA/NA (THA/TKA)

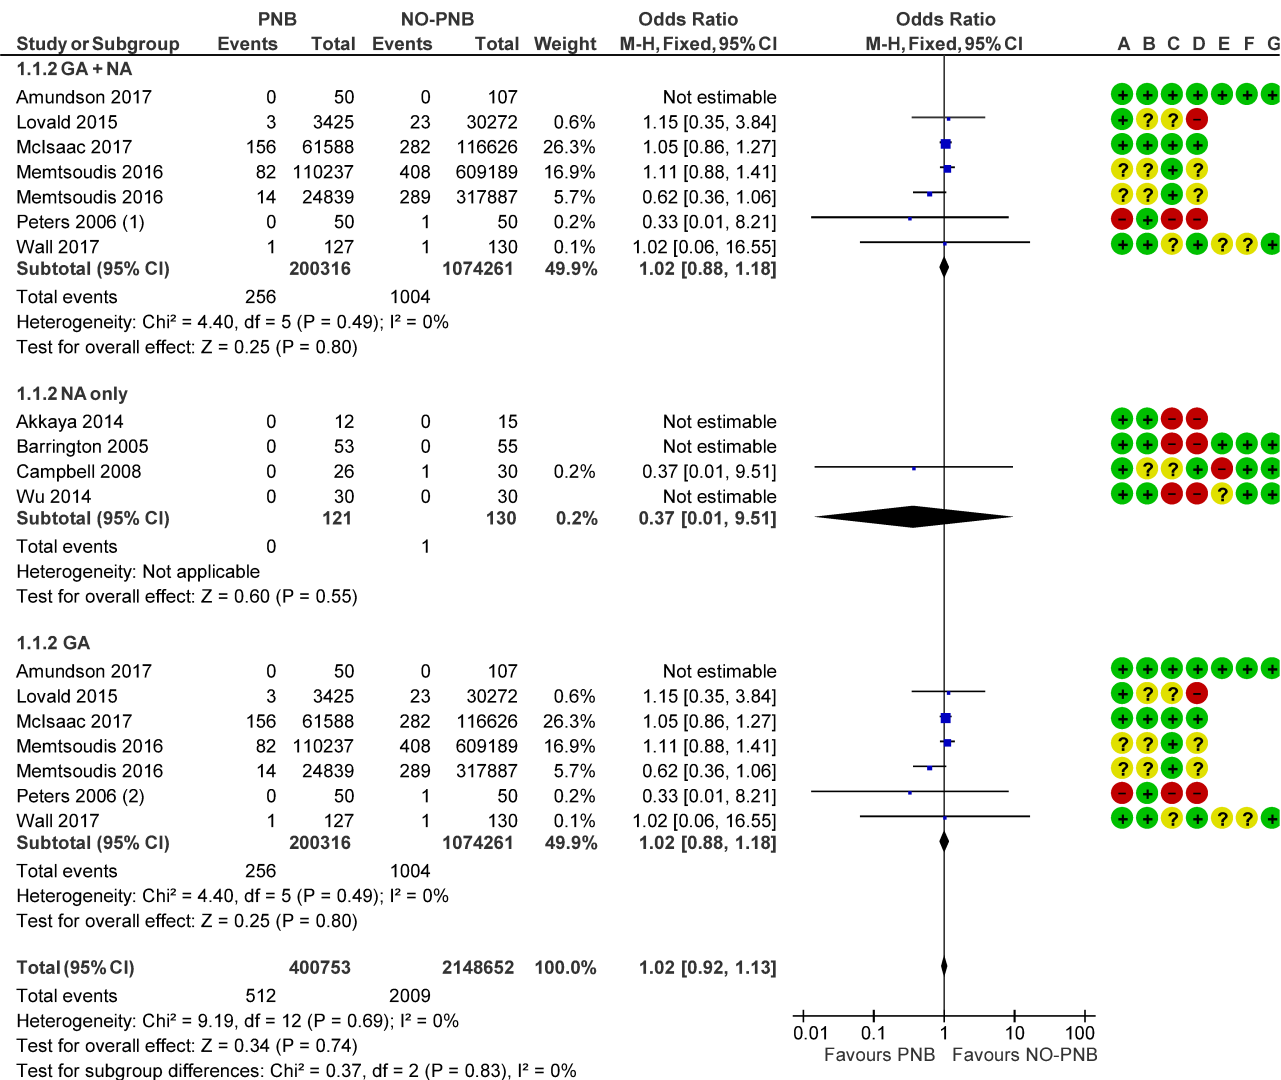

Footnotes

- (1) Peters excluded as PNB in both groups
- (2) Peters excluded as PNB in both groups

Risk of bias legend

- (A) Random sequence generation (selection bias)
- (B) Allocation concealment (selection bias)
- (C) Blinding of participants and personnel (performance bias)
- (D) Blinding of outcome assessment (detection bias)
- (E) Incomplete outcome data (attrition bias)
- (F) Selective reporting (reporting bias)
- (G) Other bias
- (H) Observational Study: Failure to develop and apply appropriate
- (I) Observational Study: Flawed measurement of exposure
- (J) Observational Study: Incomplete follow-up
- (K) Observational Study: Failure to adequately control for confounding
- (L) RCT: Selective outcome reporting
- (M) RCT: Sequence Generation
- (N) RCT: Other sources of bias
- (O) RCT: Blinding of outcome assessors
- (P) RCT: Blinding of participants and personnel
- (Q) RCT: Allocation concealment
- (R) RCT: Incomplete outcome data



PNB versus no PNB for THA/TKA

23-Feb-2021

1.2 Mortality | THA

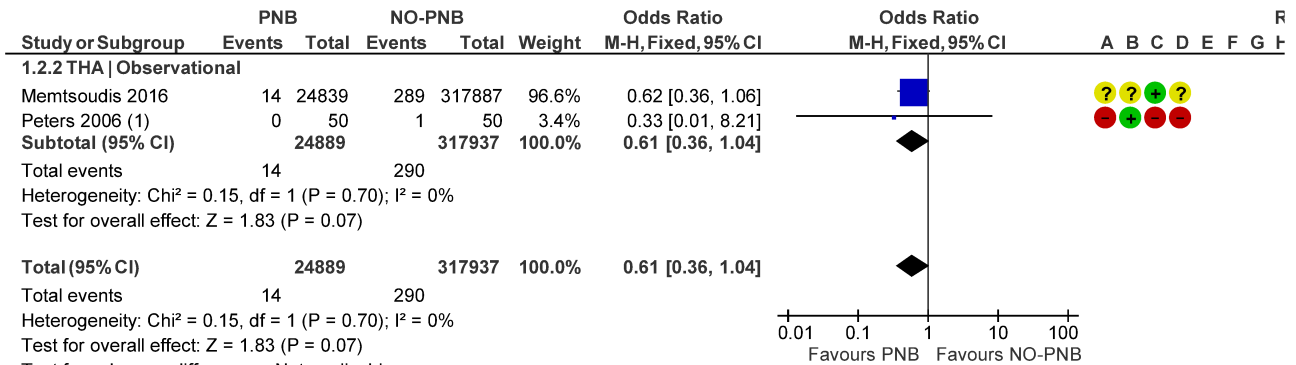

Footnotes

(1) Peters excluded as PNB in both groups

Risk of bias legend

- (A) Random sequence generation (selection bias)
- (B) Allocation concealment (selection bias)
- (C) Blinding of participants and personnel (performance bias)
- (D) Blinding of outcome assessment (detection bias)
- (E) Incomplete outcome data (attrition bias)
- (F) Selective reporting (reporting bias)
- (G) Other bias
- (H) Observational Study: Failure to develop and apply appropriate
- (I) Observational Study: Flawed measurement of exposure or
- (J) Observational Study: Incomplete follow-up
- (K) Observational Study: Failure to adequately control for confounding
- (L) RCT: Selective outcome reporting
- (M) RCT: Sequence Generation
- (N) RCT: Other sources of bias
- (O) RCT: Blinding of outcome assessors
- (P) RCT: Blinding of participants and personnel
- (Q) RCT: Allocation concealment
- (R) RCT: Incomplete outcome data

PNB versus no PNB for THA/TKA

23-Feb-2021

1.3 Mortality | TKA

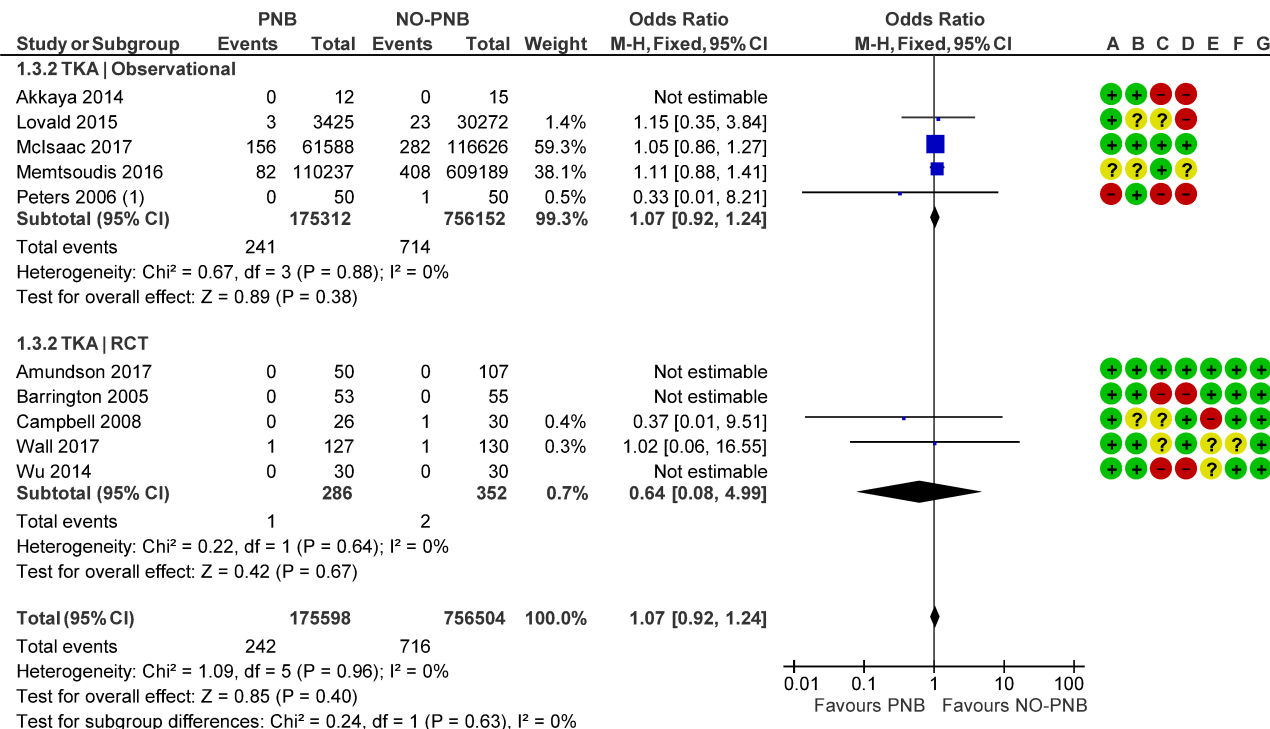

Footnotes

(1) Peters excluded as PNB in both groups

Risk of bias legend

- (A) Random sequence generation (selection bias)
- (B) Allocation concealment (selection bias)
- (C) Blinding of participants and personnel (performance bias)
- (D) Blinding of outcome assessment (detection bias)
- (E) Incomplete outcome data (attrition bias)
- (F) Selective reporting (reporting bias)
- (G) Other bias
- (H) Observational Study: Failure to develop and apply appro
- (I) Observational Study: Flawed measurement of exposure c
- (J) Observational Study: Incomplete follow-up
- (K) Observational Study: Failure to adequately control for co
- (L) RCT: Selective outcome reporting
- (M) RCT: Sequence Generation
- (N) RCT: Other sources of bias
- (O) RCT: Blinding of outcome assessors
- (P) RCT: Blinding of participants and personnel
- (Q) RCT: Allocation concealment
- (R) RCT: Incomplete outcome data

PNB versus no PNB for THA/TKA

23-Feb-2021

1.4 Mortality | Total

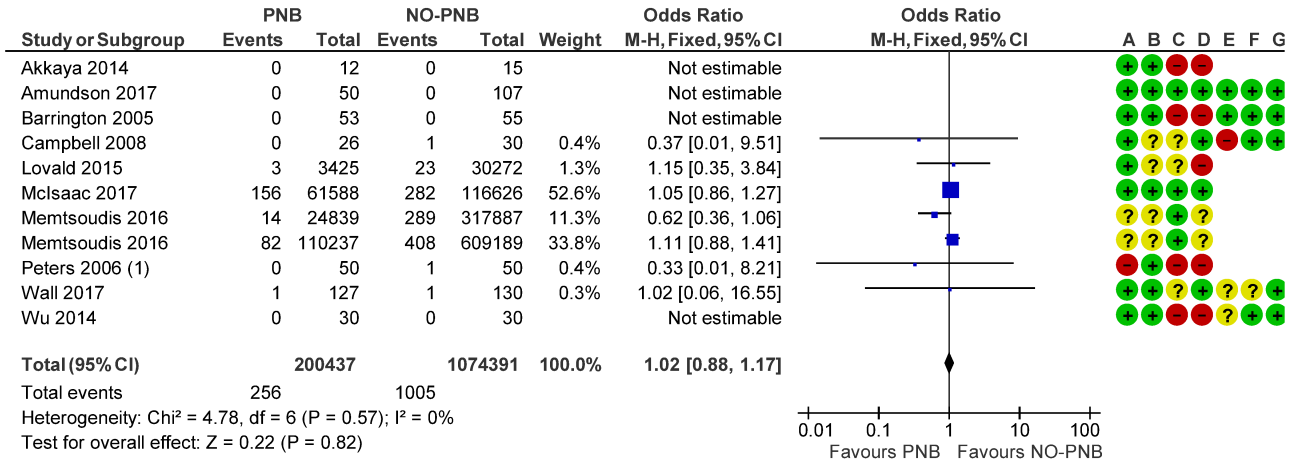

Footnotes

(1) Peters excluded as PNB in both groups

Risk of bias legend

- (A) Random sequence generation (selection bias)
- (B) Allocation concealment (selection bias)
- (C) Blinding of participants and personnel (performance bias)
- (D) Blinding of outcome assessment (detection bias)
- (E) Incomplete outcome data (attrition bias)
- (F) Selective reporting (reporting bias)
- (G) Other bias
- (H) Observational Study: Failure to develop and apply appropriate
- (I) Observational Study: Flawed measurement of exposure
- (J) Observational Study: Incomplete follow-up
- (K) Observational Study: Failure to adequately control for confounding
- (L) RCT: Selective outcome reporting
- (M) RCT: Sequence Generation
- (N) RCT: Other sources of bias
- (O) RCT: Blinding of outcome assessors
- (P) RCT: Blinding of participants and personnel
- (Q) RCT: Allocation concealment
- (R) RCT: Incomplete outcome data

PNB versus no PNB for THA/TKA

23-Feb-2021

1.5 Cardiac Composite without MI | GA/NA (THA/TKA)

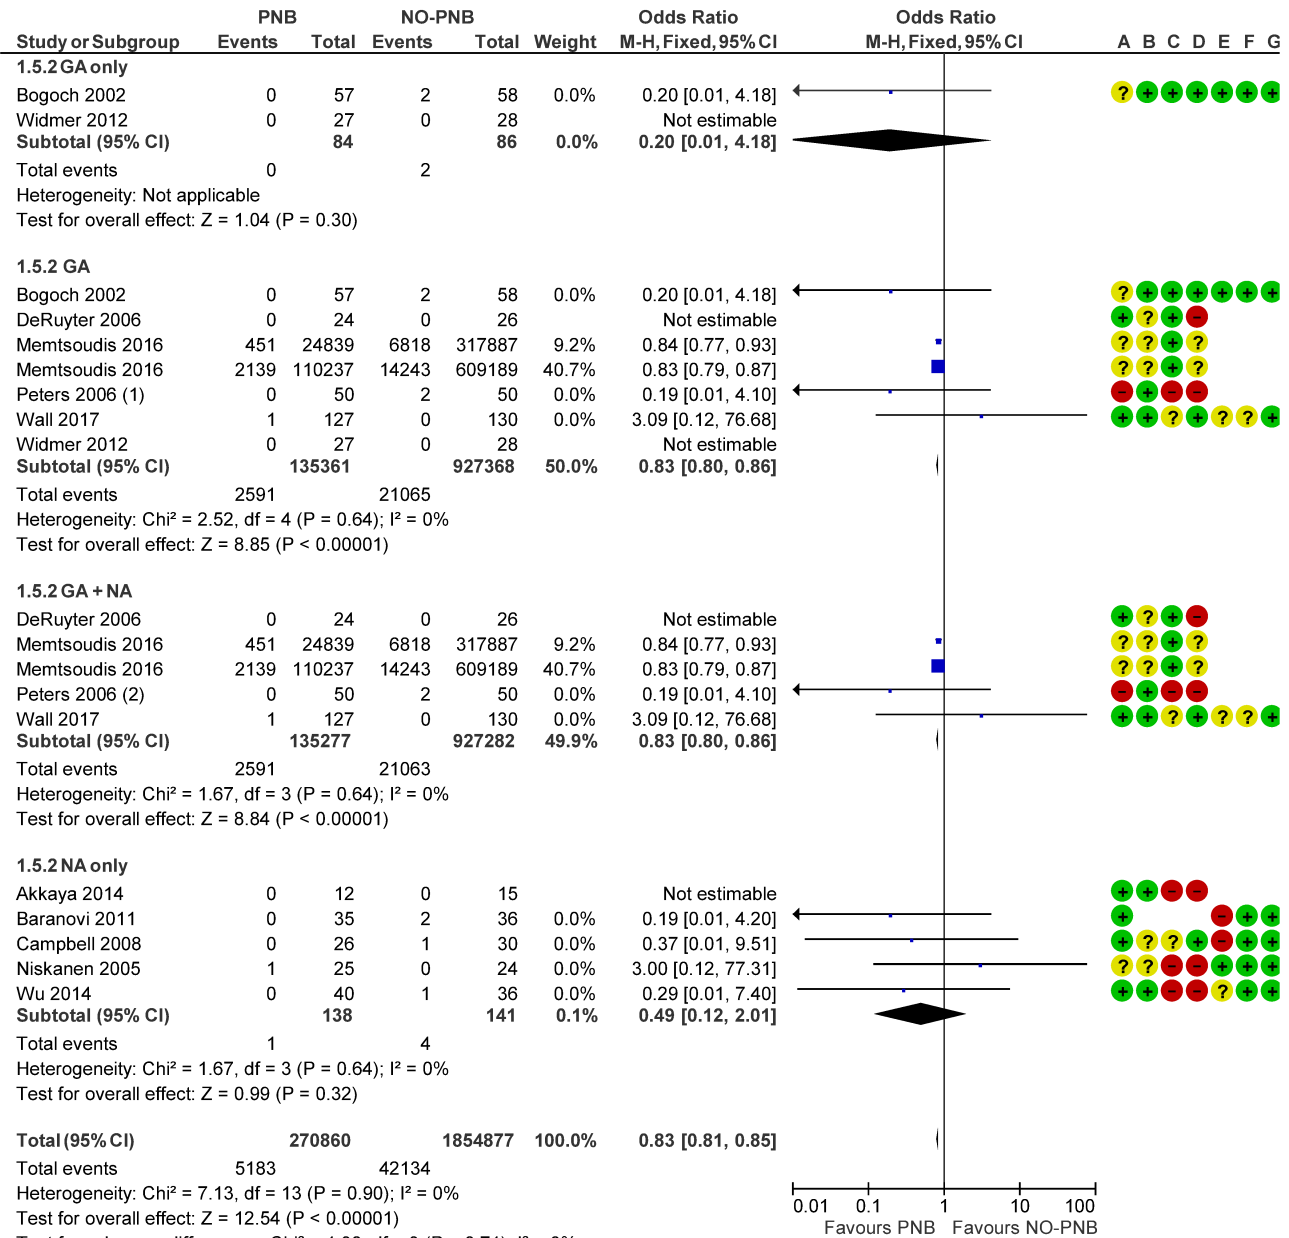

Footnotes

- (1) Peters excluded as PNB in both groups
- (2) Peters excluded as PNB in both groups

Risk of bias legend

- (A) Random sequence generation (selection bias)
- (B) Allocation concealment (selection bias)
- (C) Blinding of participants and personnel (performance bias)
- (D) Blinding of outcome assessment (detection bias)
- (E) Incomplete outcome data (attrition bias)
- (F) Selective reporting (reporting bias)
- (G) Other bias
- (H) Observational Study: Failure to develop and apply appropriate
- (I) Observational Study: Flawed measurement of exposure
- (J) Observational Study: Incomplete follow-up
- (K) Observational Study: Failure to adequately control for confounding
- (L) RCT: Selective outcome reporting

## PNB versus no PNB for THA/TKA

23-Feb-2021

- (L) RCT: Selective outcome reporting
- (M) RCT: Sequence Generation
- (N) RCT: Other sources of bias
- (O) RCT: Blinding of outcome assessors
- (P) RCT: Blinding of participants and personnel
- (Q) RCT: Allocation concealment
- (R) RCT: Incomplete outcome data

PNB versus no PNB for THA/TKA

23-Feb-2021

1.6 Cardiac Composite without MI | THA

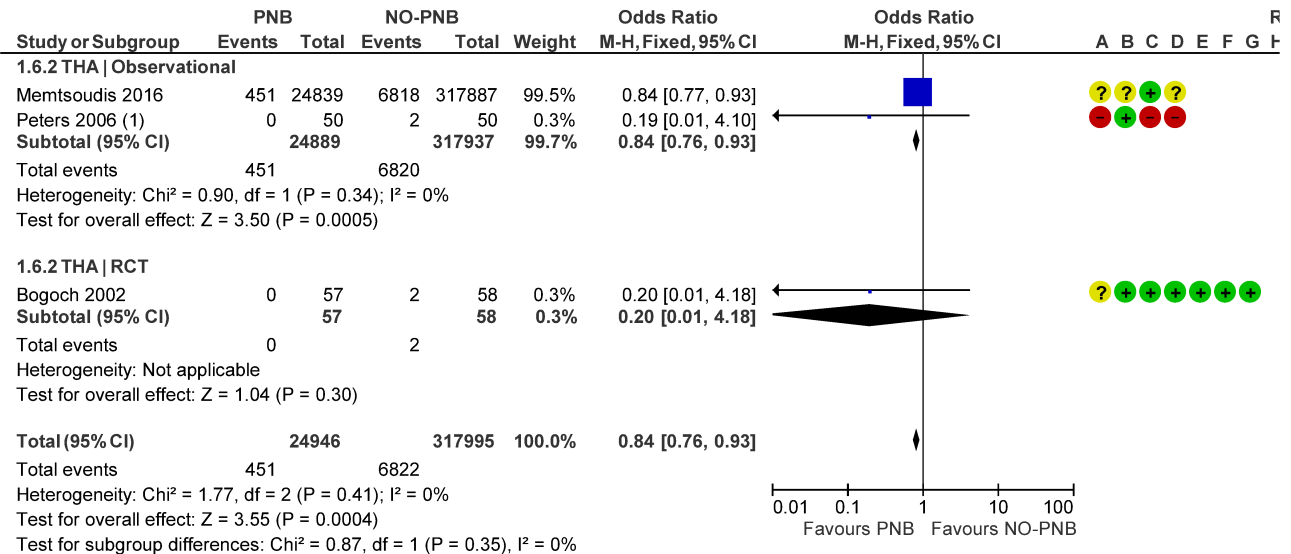

Footnotes

(1) Peters excluded as PNB in both groups

Risk of bias legend

- (A) Random sequence generation (selection bias)
- (B) Allocation concealment (selection bias)
- (C) Blinding of participants and personnel (performance bias)
- (D) Blinding of outcome assessment (detection bias)
- (E) Incomplete outcome data (attrition bias)
- (F) Selective reporting (reporting bias)
- (G) Other bias
- (H) Observational Study: Failure to develop and apply approp
- (I) Observational Study: Flawed measurement of exposure or
- (J) Observational Study: Incomplete follow-up
- (K) Observational Study: Failure to adequately control for con
- (L) RCT: Selective outcome reporting
- (M) RCT: Sequence Generation
- (N) RCT: Other sources of bias
- (O) RCT: Blinding of outcome assessors
- (P) RCT: Blinding of participants and personnel
- (Q) RCT: Allocation concealment
- (R) RCT: Incomplete outcome data

PNB versus no PNB for THA/TKA

23-Feb-2021

1.7 Cardiac Composite without MI | Total

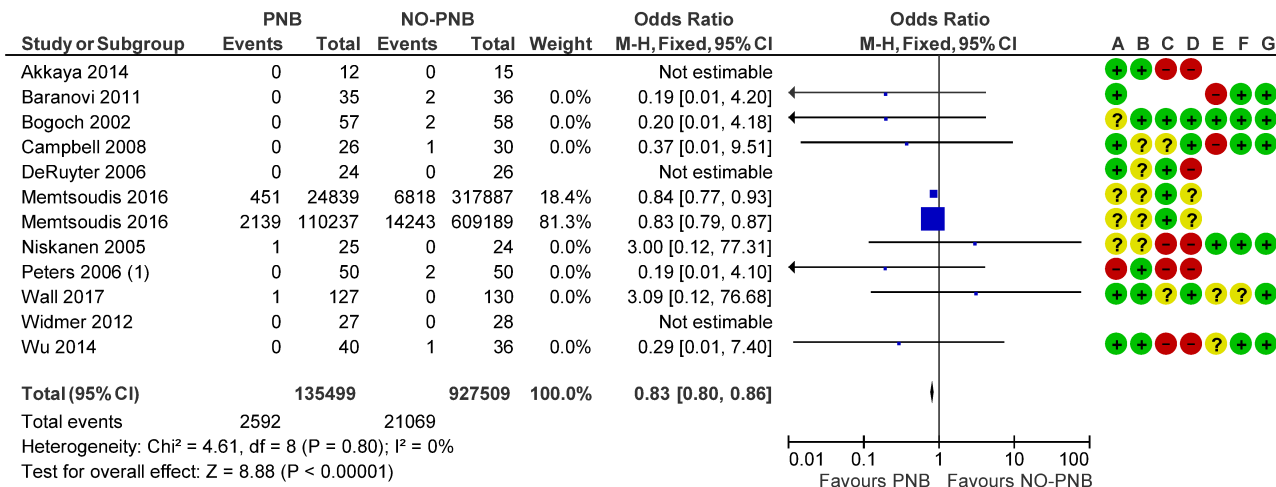

Footnotes

(1) Peters excluded as PNB in both groups

Risk of bias legend

- (A) Random sequence generation (selection bias)
- (B) Allocation concealment (selection bias)
- (C) Blinding of participants and personnel (performance bias)
- (D) Blinding of outcome assessment (detection bias)
- (E) Incomplete outcome data (attrition bias)
- (F) Selective reporting (reporting bias)
- (G) Other bias
- (H) Observational Study: Failure to develop and apply appro
- (I) Observational Study: Flawed measurement of exposure c
- (J) Observational Study: Incomplete follow-up
- (K) Observational Study: Failure to adequately control for co
- (L) RCT: Selective outcome reporting
- (M) RCT: Sequence Generation
- (N) RCT: Other sources of bias
- (O) RCT: Blinding of outcome assessors
- (P) RCT: Blinding of participants and personnel
- (Q) RCT: Allocation concealment
- (R) RCT: Incomplete outcome data

PNB versus no PNB for THA/TKA

23-Feb-2021

1.8 Cardiac Composite without MI | TKA

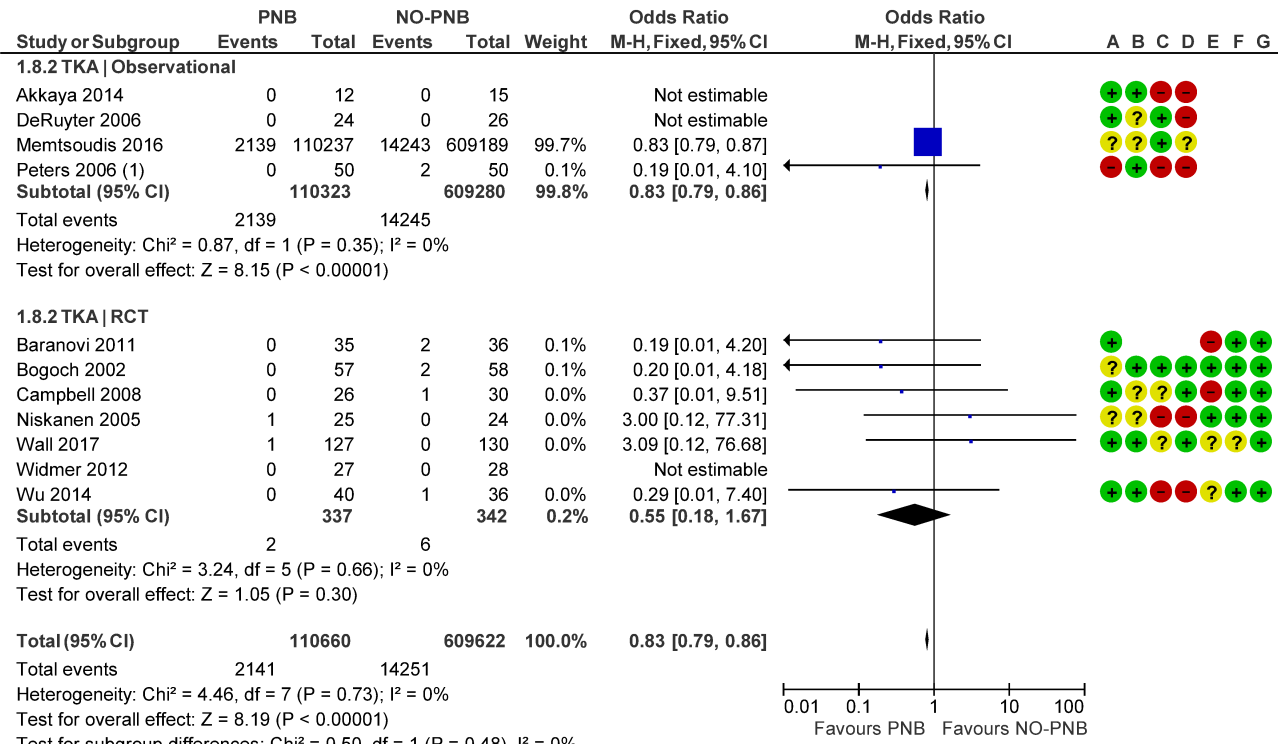

Footnotes

(1) Peters excluded as PNB in both groups

Risk of bias legend

- (A) Random sequence generation (selection bias)
- (B) Allocation concealment (selection bias)
- (C) Blinding of participants and personnel (performance bias)
- (D) Blinding of outcome assessment (detection bias)
- (E) Incomplete outcome data (attrition bias)
- (F) Selective reporting (reporting bias)
- (G) Other bias
- (H) Observational Study: Failure to develop and apply appro
- (I) Observational Study: Flawed measurement of exposure c
- (J) Observational Study: Incomplete follow-up
- (K) Observational Study: Failure to adequately control for co
- (L) RCT: Selective outcome reporting
- (M) RCT: Sequence Generation
- (N) RCT: Other sources of bias
- (O) RCT: Blinding of outcome assessors
- (P) RCT: Blinding of participants and personnel
- (Q) RCT: Allocation concealment
- (R) RCT: Incomplete outcome data



PNB versus no PNB for THA/TKA

23-Feb-2021

1.9 Myocardial infarction | GA/NA (THA/TKA)

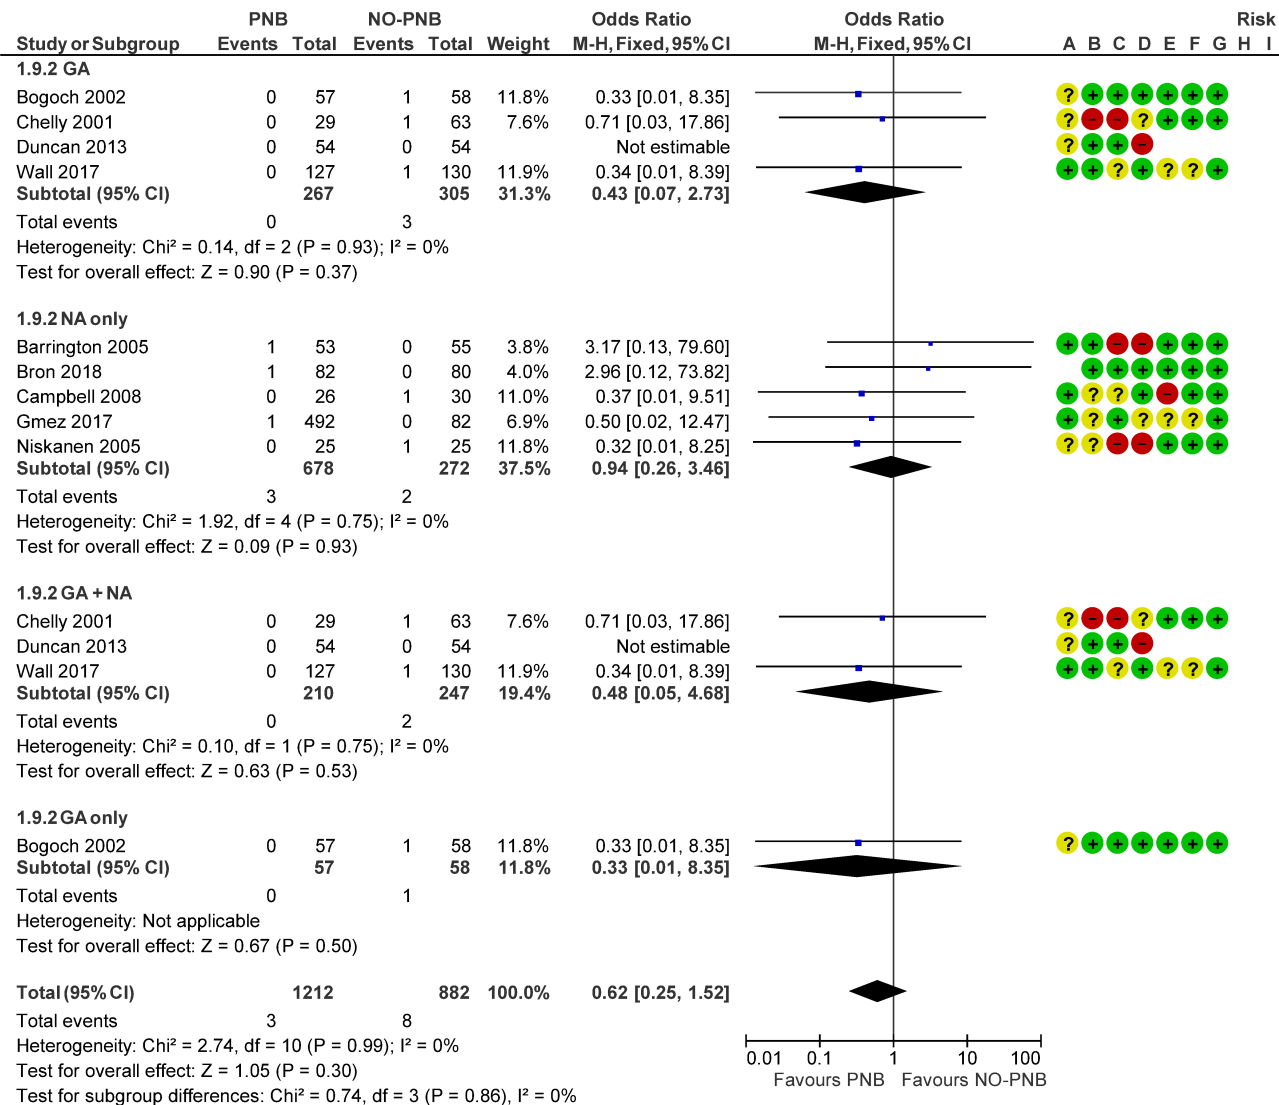

Risk of bias legend

- (A) Random sequence generation (selection bias)
- (B) Allocation concealment (selection bias)
- (C) Blinding of participants and personnel (performance bias)
- (D) Blinding of outcome assessment (detection bias)
- (E) Incomplete outcome data (attrition bias)
- (F) Selective reporting (reporting bias)
- (G) Other bias
- (H) Observational Study: Failure to develop and apply appropriate eligibility criteria
- (I) Observational Study: Flawed measurement of exposure or outcome
- (J) Observational Study: Incomplete follow-up
- (K) Observational Study: Failure to adequately control for confounding
- (L) RCT: Selective outcome reporting
- (M) RCT: Sequence Generation
- (N) RCT: Other sources of bias
- (O) RCT: Blinding of outcome assessors
- (P) RCT: Blinding of participants and personnel
- (Q) RCT: Allocation concealment
- (R) RCT: Incomplete outcome data

PNB versus no PNB for THA/TKA

23-Feb-2021

(R) RCT: incomplete outcome data

1.10 Myocardial infarction | THA

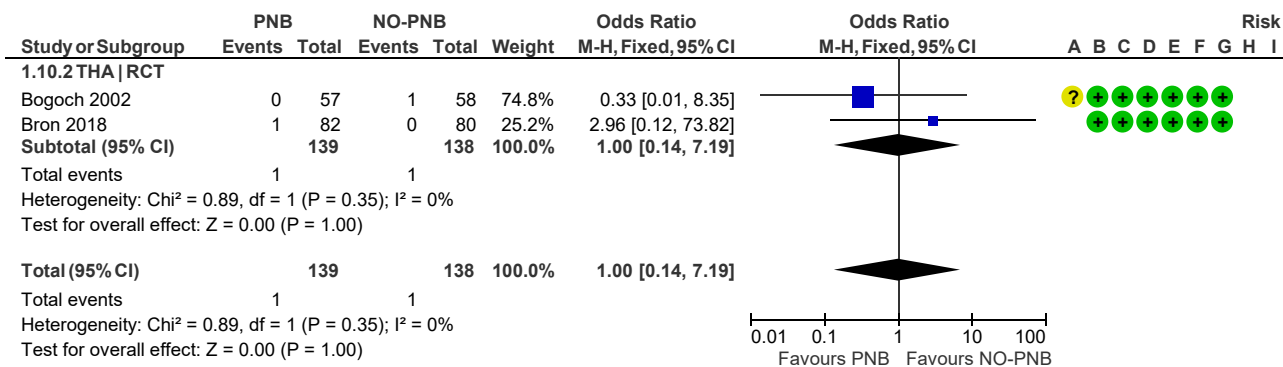

Risk of bias legend

- (A) Random sequence generation (selection bias)
- (B) Allocation concealment (selection bias)
- (C) Blinding of participants and personnel (performance bias)
- (D) Blinding of outcome assessment (detection bias)
- (E) Incomplete outcome data (attrition bias)
- (F) Selective reporting (reporting bias)
- (G) Other bias
- (H) Observational Study: Failure to develop and apply appropriate eligibility criteria
- (I) Observational Study: Flawed measurement of exposure or outcome
- (J) Observational Study: Incomplete follow-up
- (K) Observational Study: Failure to adequately control for confounding
- (L) RCT: Selective outcome reporting
- (M) RCT: Sequence Generation
- (N) RCT: Other sources of bias
- (O) RCT: Blinding of outcome assessors
- (P) RCT: Blinding of participants and personnel
- (Q) RCT: Allocation concealment
- (R) RCT: Incomplete outcome data

PNB versus no PNB for THA/TKA

23-Feb-2021

1.11 Myocardial infarction | Total

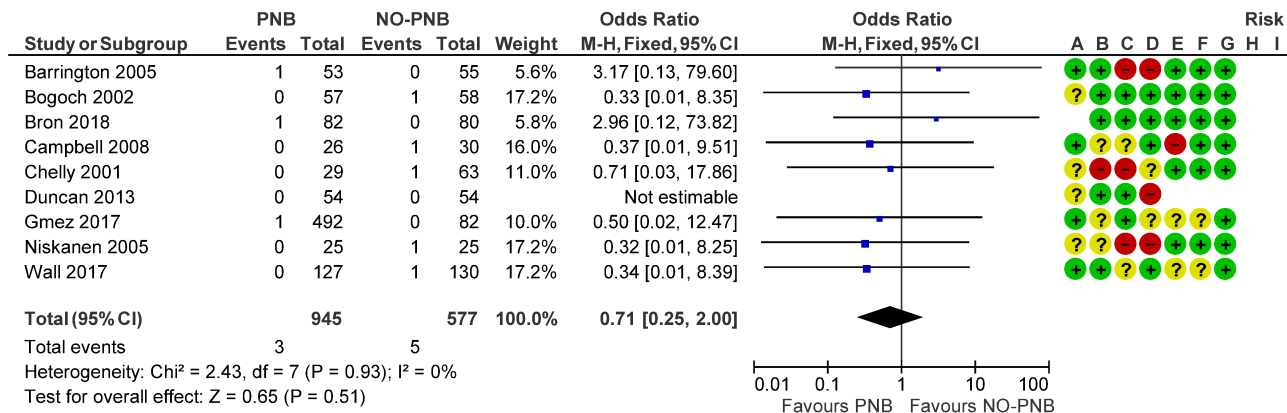

Risk of bias legend

- (A) Random sequence generation (selection bias)
- (B) Allocation concealment (selection bias)
- (C) Blinding of participants and personnel (performance bias)
- (D) Blinding of outcome assessment (detection bias)
- (E) Incomplete outcome data (attrition bias)
- (F) Selective reporting (reporting bias)
- (G) Other bias
- (H) Observational Study: Failure to develop and apply appropriate eligibility criteria
- (I) Observational Study: Flawed measurement of exposure or outcome
- (J) Observational Study: Incomplete follow-up
- (K) Observational Study: Failure to adequately control for confounding
- (L) RCT: Selective outcome reporting
- (M) RCT: Sequence Generation
- (N) RCT: Other sources of bias
- (O) RCT: Blinding of outcome assessors
- (P) RCT: Blinding of participants and personnel
- (Q) RCT: Allocation concealment
- (R) RCT: Incomplete outcome data

PNB versus no PNB for THA/TKA

23-Feb-2021

1.12 Myocardial infarction | TKA

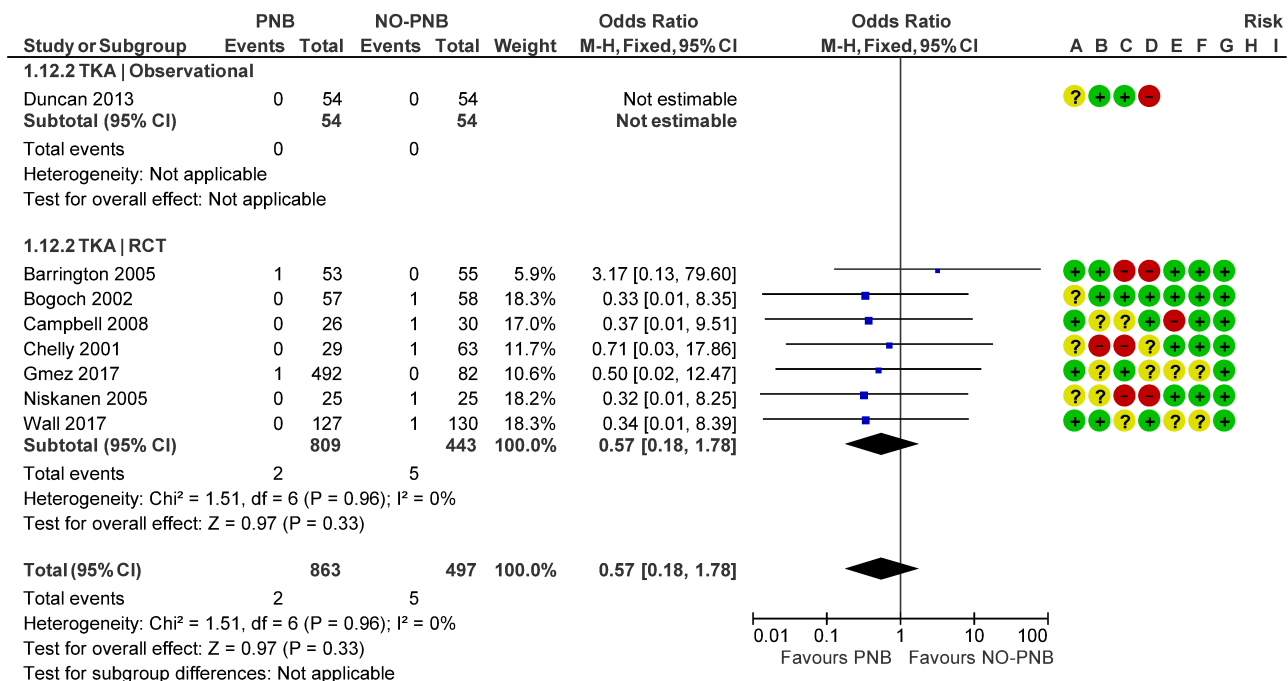

Risk of bias legend

- (A) Random sequence generation (selection bias)
- (B) Allocation concealment (selection bias)
- (C) Blinding of participants and personnel (performance bias)
- (D) Blinding of outcome assessment (detection bias)
- (E) Incomplete outcome data (attrition bias)
- (F) Selective reporting (reporting bias)
- (G) Other bias
- (H) Observational Study: Failure to develop and apply appropriate eligibility criteria
- (I) Observational Study: Flawed measurement of exposure or outcome
- (J) Observational Study: Incomplete follow-up
- (K) Observational Study: Failure to adequately control for confounding
- (L) RCT: Selective outcome reporting
- (M) RCT: Sequence Generation
- (N) RCT: Other sources of bias
- (O) RCT: Blinding of outcome assessors
- (P) RCT: Blinding of participants and personnel
- (Q) RCT: Allocation concealment
- (R) RCT: Incomplete outcome data

## PNB versus no PNB for THA/TKA

23-Feb-2021

## 1.13 Atrial fibrillation | Total

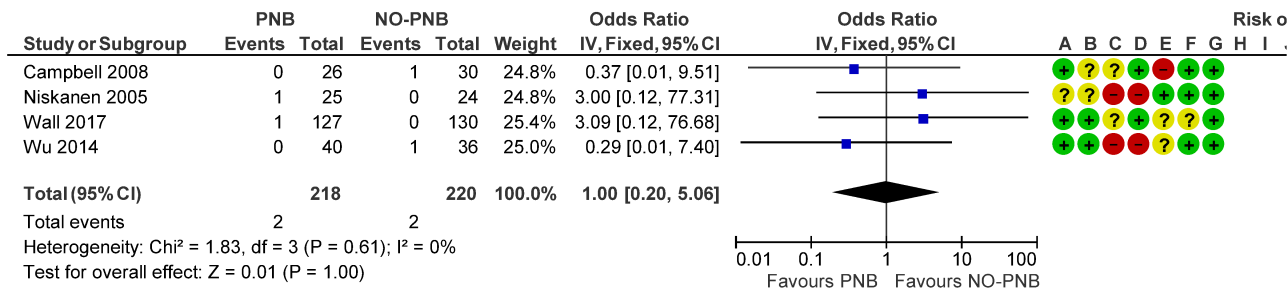Risk of bias legend

- (A) Random sequence generation (selection bias)
- (B) Allocation concealment (selection bias)
- (C) Blinding of participants and personnel (performance bias)
- (D) Blinding of outcome assessment (detection bias)
- (E) Incomplete outcome data (attrition bias)
- (F) Selective reporting (reporting bias)
- (G) Other bias
- (H) Observational Study: Failure to develop and apply appropriate eligibility criteria
- (I) Observational Study: Flawed measurement of exposure or outcome
- (J) Observational Study: Incomplete follow-up
- (K) Observational Study: Failure to adequately control for confounding
- (L) RCT: Selective outcome reporting
- (M) RCT: Sequence Generation
- (N) RCT: Other sources of bias
- (O) RCT: Blinding of outcome assessors
- (P) RCT: Blinding of participants and personnel
- (Q) RCT: Allocation concealment
- (R) RCT: Incomplete outcome data

PNB versus no PNB for THA/TKA

23-Feb-2021

1.14 Atrial fibrillation | TKA

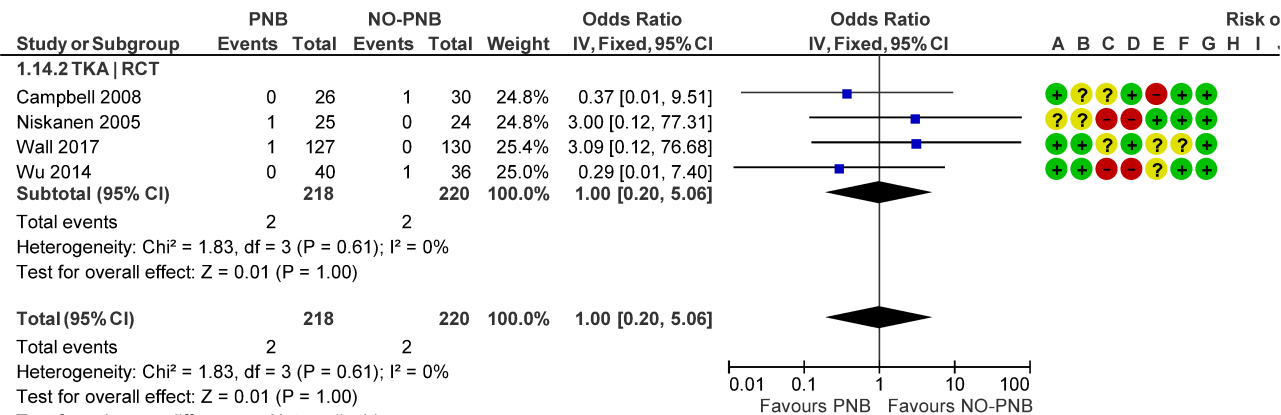

Risk of bias legend

- (A) Random sequence generation (selection bias)
- (B) Allocation concealment (selection bias)
- (C) Blinding of participants and personnel (performance bias)
- (D) Blinding of outcome assessment (detection bias)
- (E) Incomplete outcome data (attrition bias)
- (F) Selective reporting (reporting bias)
- (G) Other bias
- (H) Observational Study: Failure to develop and apply appropriate eligibility criteria
- (I) Observational Study: Flawed measurement of exposure or outcome
- (J) Observational Study: Incomplete follow-up
- (K) Observational Study: Failure to adequately control for confounding
- (L) RCT: Selective outcome reporting
- (M) RCT: Sequence Generation
- (N) RCT: Other sources of bias
- (O) RCT: Blinding of outcome assessors
- (P) RCT: Blinding of participants and personnel
- (Q) RCT: Allocation concealment
- (R) RCT: Incomplete outcome data

PNB versus no PNB for THA/TKA

23-Feb-2021

1.15 Atrial fibrillation | GA/NA (THA/TKA)

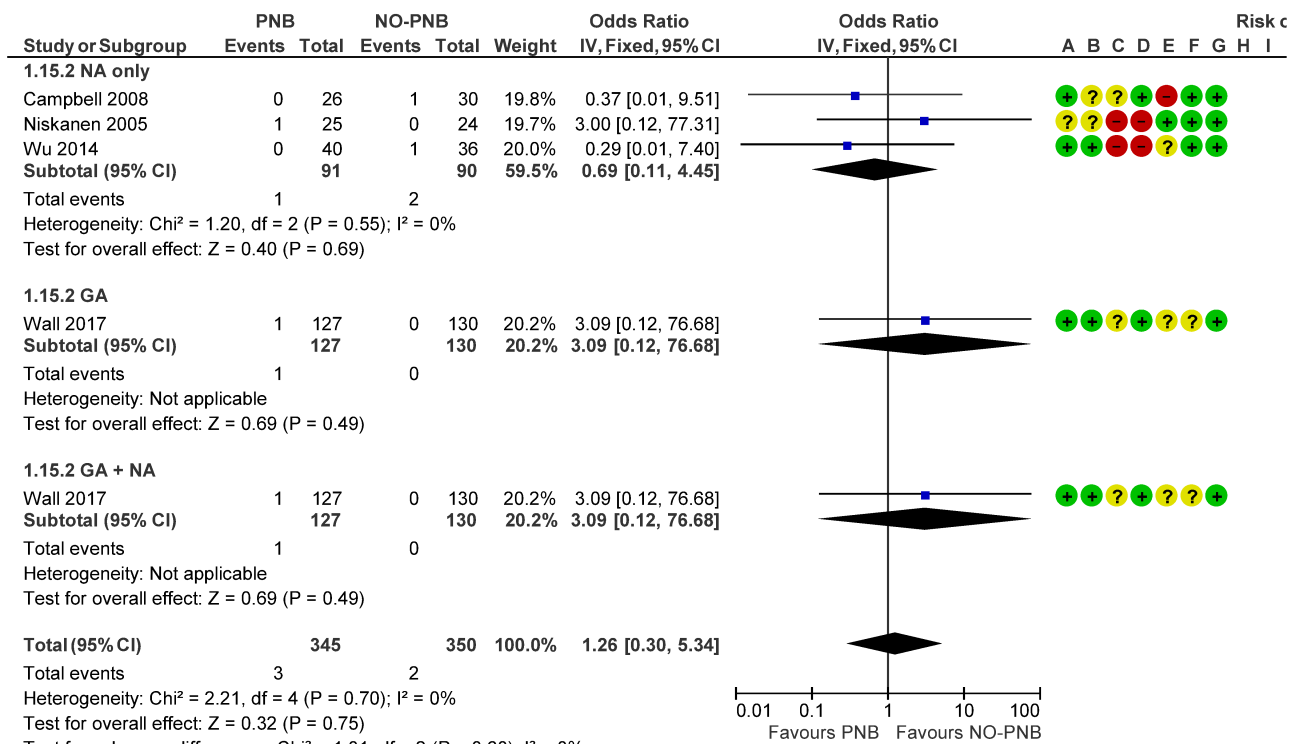

Risk of bias legend

- (A) Random sequence generation (selection bias)
- (B) Allocation concealment (selection bias)
- (C) Blinding of participants and personnel (performance bias)
- (D) Blinding of outcome assessment (detection bias)
- (E) Incomplete outcome data (attrition bias)
- (F) Selective reporting (reporting bias)
- (G) Other bias
- (H) Observational Study: Failure to develop and apply appropriate eligibility criteria
- (I) Observational Study: Flawed measurement of exposure or outcome
- (J) Observational Study: Incomplete follow-up
- (K) Observational Study: Failure to adequately control for confounding
- (L) RCT: Selective outcome reporting
- (M) RCT: Sequence Generation
- (N) RCT: Other sources of bias
- (O) RCT: Blinding of outcome assessors
- (P) RCT: Blinding of participants and personnel
- (Q) RCT: Allocation concealment
- (R) RCT: Incomplete outcome data

PNB versus no PNB for THA/TKA

23-Feb-2021

1.16 Pulmonary Composite | THA

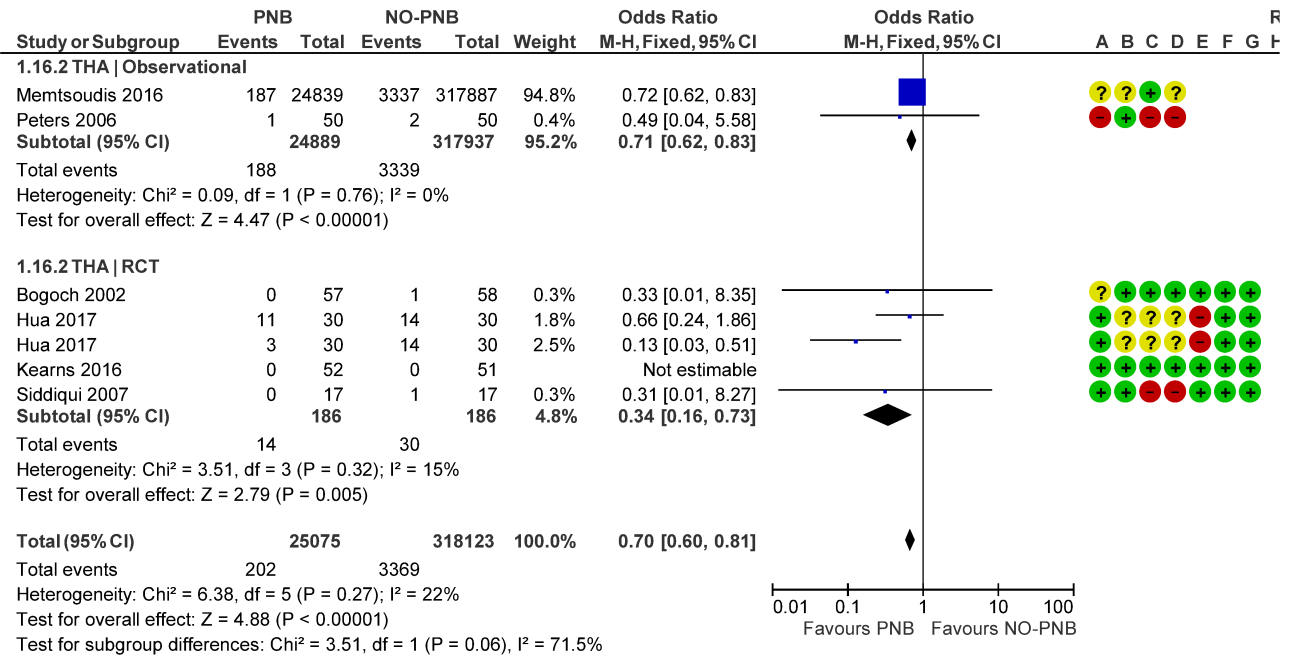

Risk of bias legend

- (A) Random sequence generation (selection bias)
- (B) Allocation concealment (selection bias)
- (C) Blinding of participants and personnel (performance bias)
- (D) Blinding of outcome assessment (detection bias)
- (E) Incomplete outcome data (attrition bias)
- (F) Selective reporting (reporting bias)
- (G) Other bias
- (H) Observational Study: Failure to develop and apply appropriate eligibility criteria
- (I) Observational Study: Flawed measurement of exposure or outcome
- (J) Observational Study: Incomplete follow-up
- (K) Observational Study: Failure to adequately control for confounding
- (L) RCT: Selective outcome reporting
- (M) RCT: Sequence Generation
- (N) RCT: Other sources of bias
- (O) RCT: Blinding of outcome assessors
- (P) RCT: Blinding of participants and personnel
- (Q) RCT: Allocation concealment
- (R) RCT: Incomplete outcome data



PNB versus no PNB for THA/TKA

23-Feb-2021

1.17 Pulmonary Composite | TKA

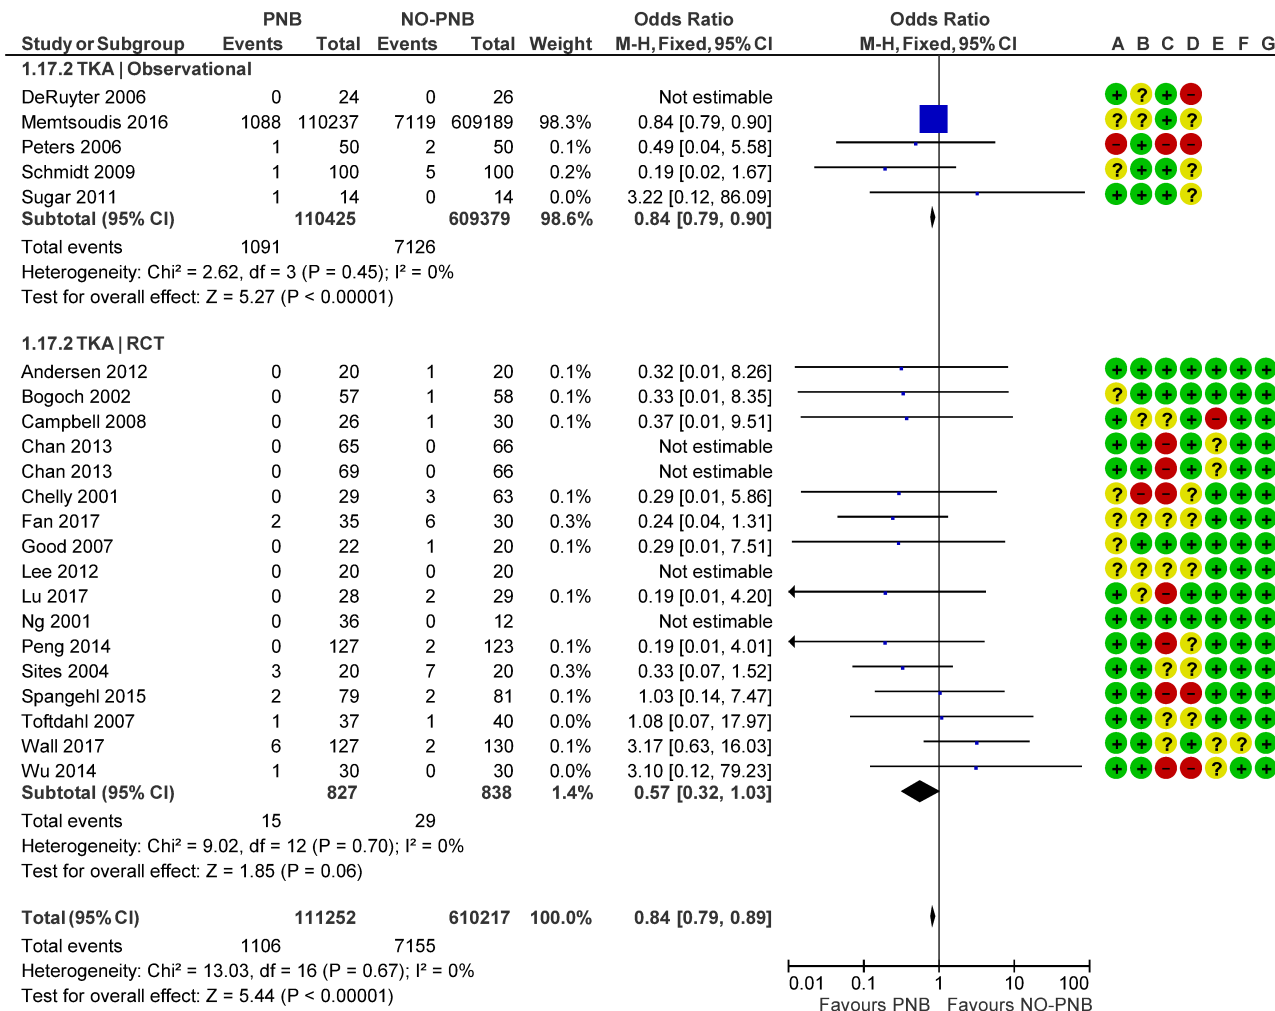

Risk of bias legend

- (A) Random sequence generation (selection bias)
- (B) Allocation concealment (selection bias)
- (C) Blinding of participants and personnel (performance bias)
- (D) Blinding of outcome assessment (detection bias)
- (E) Incomplete outcome data (attrition bias)
- (F) Selective reporting (reporting bias)
- (G) Other bias
- (H) Observational Study: Failure to develop and apply appropriate eligibility criteria
- (I) Observational Study: Flawed measurement of exposure or outcome
- (J) Observational Study: Incomplete follow-up
- (K) Observational Study: Failure to adequately control for confounding
- (L) RCT: Selective outcome reporting
- (M) RCT: Sequence Generation
- (N) RCT: Other sources of bias
- (O) RCT: Blinding of outcome assessors
- (P) RCT: Blinding of participants and personnel
- (Q) RCT: Allocation concealment
- (R) RCT: Incomplete outcome data

PNB versus no PNB for THA/TKA

23-Feb-2021

1.18 Pulmonary Composite | Total

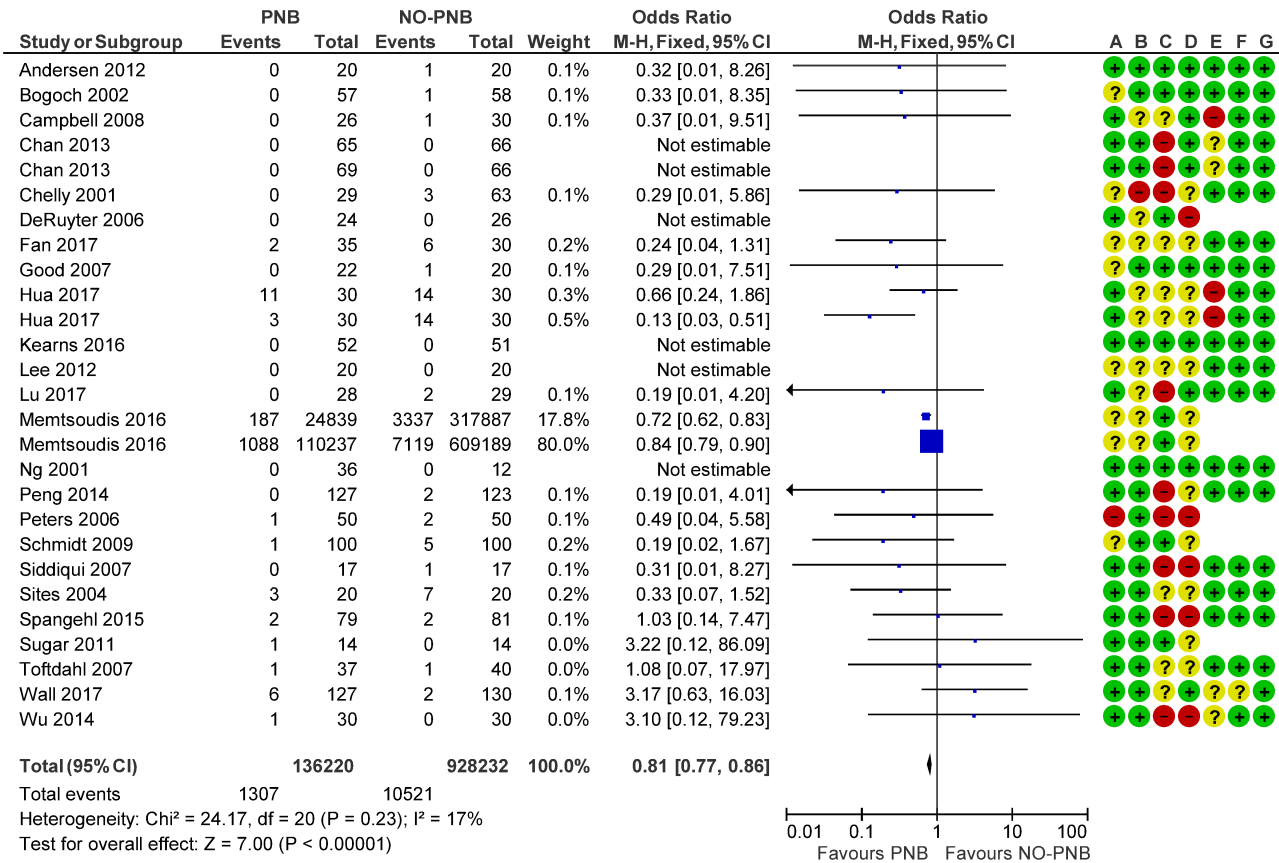

Risk of bias legend

- (A) Random sequence generation (selection bias)
- (B) Allocation concealment (selection bias)
- (C) Blinding of participants and personnel (performance bias)
- (D) Blinding of outcome assessment (detection bias)
- (E) Incomplete outcome data (attrition bias)
- (F) Selective reporting (reporting bias)
- (G) Other bias
- (H) Observational Study: Failure to develop and apply appropriate eligibility criteria
- (I) Observational Study: Flawed measurement of exposure or outcome
- (J) Observational Study: Incomplete follow-up
- (K) Observational Study: Failure to adequately control for confounding
- (L) RCT: Selective outcome reporting
- (M) RCT: Sequence Generation
- (N) RCT: Other sources of bias
- (O) RCT: Blinding of outcome assessors
- (P) RCT: Blinding of participants and personnel
- (Q) RCT: Allocation concealment
- (R) RCT: Incomplete outcome data

PNB versus no PNB for THA/TKA

23-Feb-2021

1.19 Pulmonary Composite | GA/NA (THA/TKA)

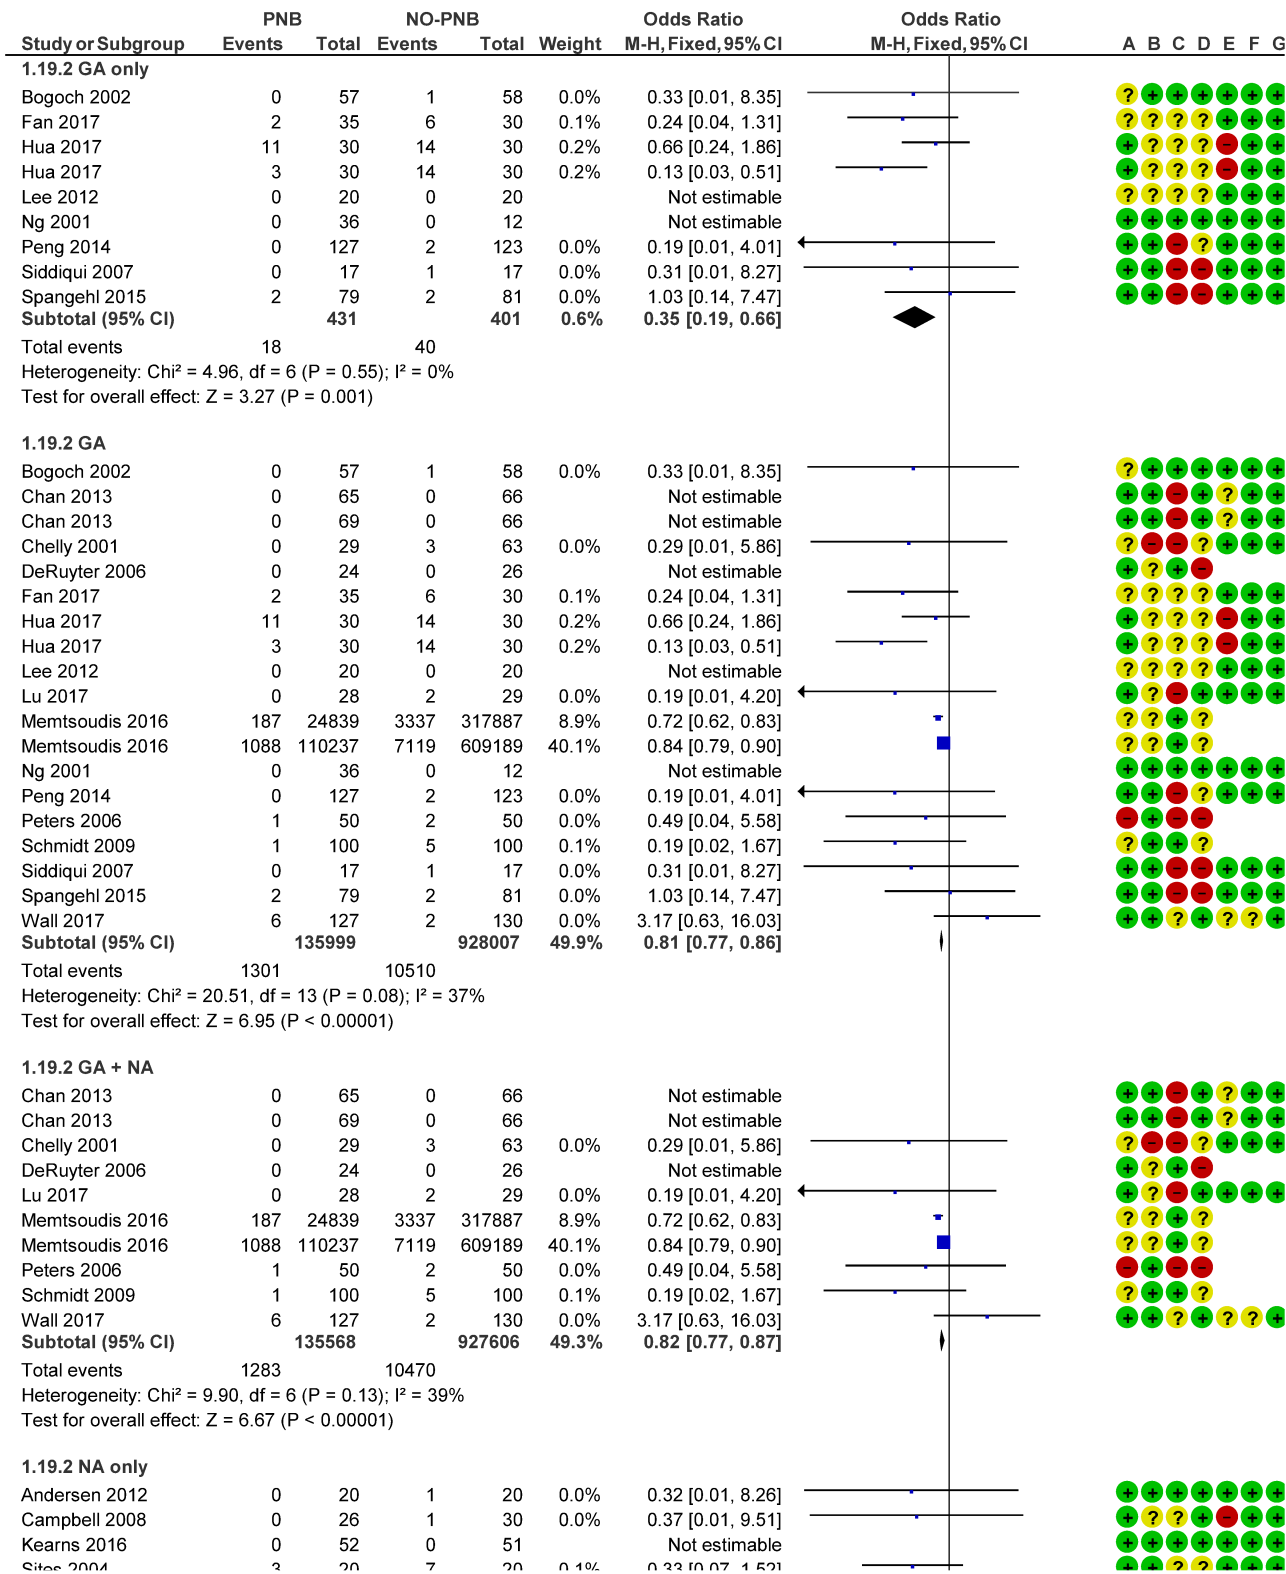

**PNB versus no PNB for THA/TKA**

23-Feb-2021

| Study                                                                          | n | no         | no | 0.1%       | 0.00 [0.07, 1.92] |
|--------------------------------------------------------------------------------|---|------------|----|------------|-------------------|
| Sugar 2011                                                                     | 1 | 14         | 0  | 14         | 0.0%              |
| Toftdahl 2007                                                                  | 1 | 37         | 1  | 40         | 0.0%              |
| Wu 2014                                                                        | 1 | 30         | 0  | 30         | 0.0%              |
| <b>Subtotal (95% CI)</b>                                                       |   | <b>199</b> |    | <b>205</b> | <b>0.2%</b>       |
| Total events                                                                   | 6 | 10         |    |            |                   |
| Heterogeneity: Chi <sup>2</sup> = 3.00, df = 5 (P = 0.70); I <sup>2</sup> = 0% |   |            |    |            |                   |
| Test for overall effect: Z = 0.90 (P = 0.37)                                   |   |            |    |            |                   |

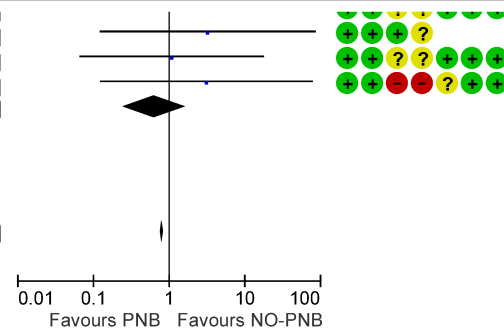

|                                                                                                   |               |                |               |                          |
|---------------------------------------------------------------------------------------------------|---------------|----------------|---------------|--------------------------|
| <b>Total (95% CI)</b>                                                                             | <b>272197</b> | <b>1856219</b> | <b>100.0%</b> | <b>0.81 [0.78, 0.85]</b> |
| Total events                                                                                      | 2608          | 21030          |               |                          |
| Heterogeneity: Chi <sup>2</sup> = 44.30, df = 33 (P = 0.09); I <sup>2</sup> = 26%                 |               |                |               |                          |
| Test for overall effect: Z = 9.85 (P < 0.00001)                                                   |               |                |               |                          |
| Test for subgroup differences: Chi <sup>2</sup> = 7.14, df = 3 (P = 0.07), I <sup>2</sup> = 58.0% |               |                |               |                          |

Risk of bias legend

- (A) Random sequence generation (selection bias)
- (B) Allocation concealment (selection bias)
- (C) Blinding of participants and personnel (performance bias)
- (D) Blinding of outcome assessment (detection bias)
- (E) Incomplete outcome data (attrition bias)
- (F) Selective reporting (reporting bias)
- (G) Other bias
- (H) Observational Study: Failure to develop and apply appropriate eligibility criteria
- (I) Observational Study: Flawed measurement of exposure or outcome
- (J) Observational Study: Incomplete follow-up
- (K) Observational Study: Failure to adequately control for confounding
- (L) RCT: Selective outcome reporting
- (M) RCT: Sequence Generation
- (N) RCT: Other sources of bias
- (O) RCT: Blinding of outcome assessors
- (P) RCT: Blinding of participants and personnel
- (Q) RCT: Allocation concealment
- (R) RCT: Incomplete outcome data

PNB versus no PNB for THA/TKA

23-Feb-2021

1.20 Respiratory failure (composite) | THA

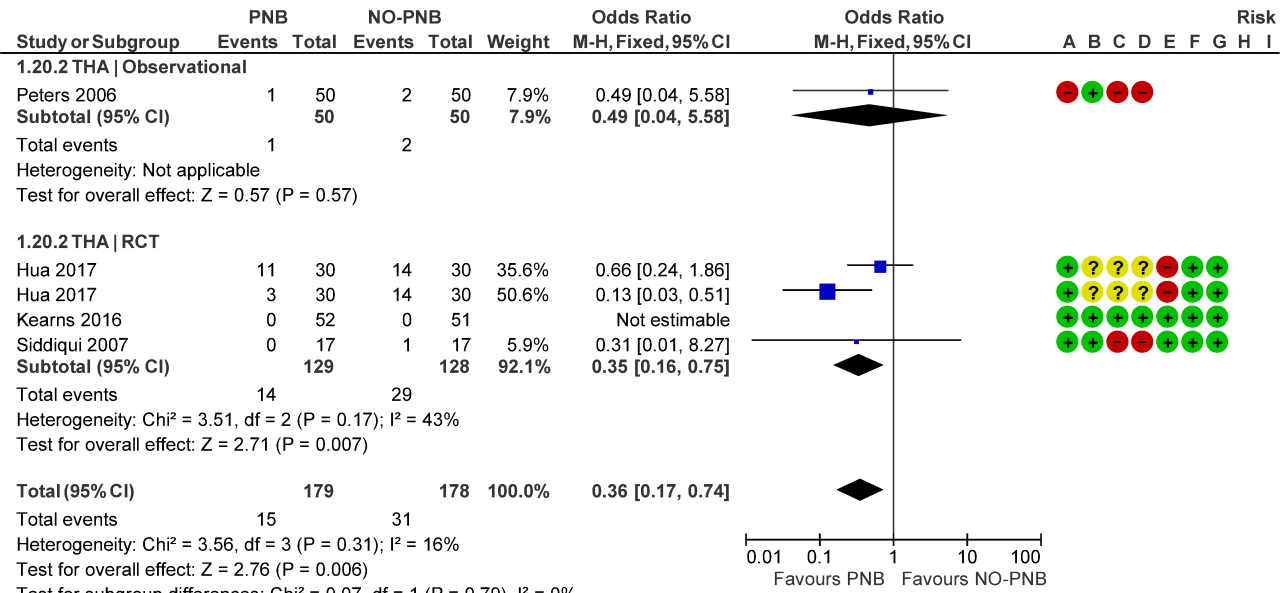

Risk of bias legend

- (A) Random sequence generation (selection bias)
- (B) Allocation concealment (selection bias)
- (C) Blinding of participants and personnel (performance bias)
- (D) Blinding of outcome assessment (detection bias)
- (E) Incomplete outcome data (attrition bias)
- (F) Selective reporting (reporting bias)
- (G) Other bias
- (H) Observational Study: Failure to develop and apply appropriate eligibility criteria
- (I) Observational Study: Flawed measurement of exposure or outcome
- (J) Observational Study: Incomplete follow-up
- (K) Observational Study: Failure to adequately control for confounding
- (L) RCT: Selective outcome reporting
- (M) RCT: Sequence Generation
- (N) RCT: Other sources of bias
- (O) RCT: Blinding of outcome assessors
- (P) RCT: Blinding of participants and personnel
- (Q) RCT: Allocation concealment
- (R) RCT: Incomplete outcome data

PNB versus no PNB for THA/TKA

23-Feb-2021

1.21 Respiratory failure (composite) | GA/NA (THA/TKA)

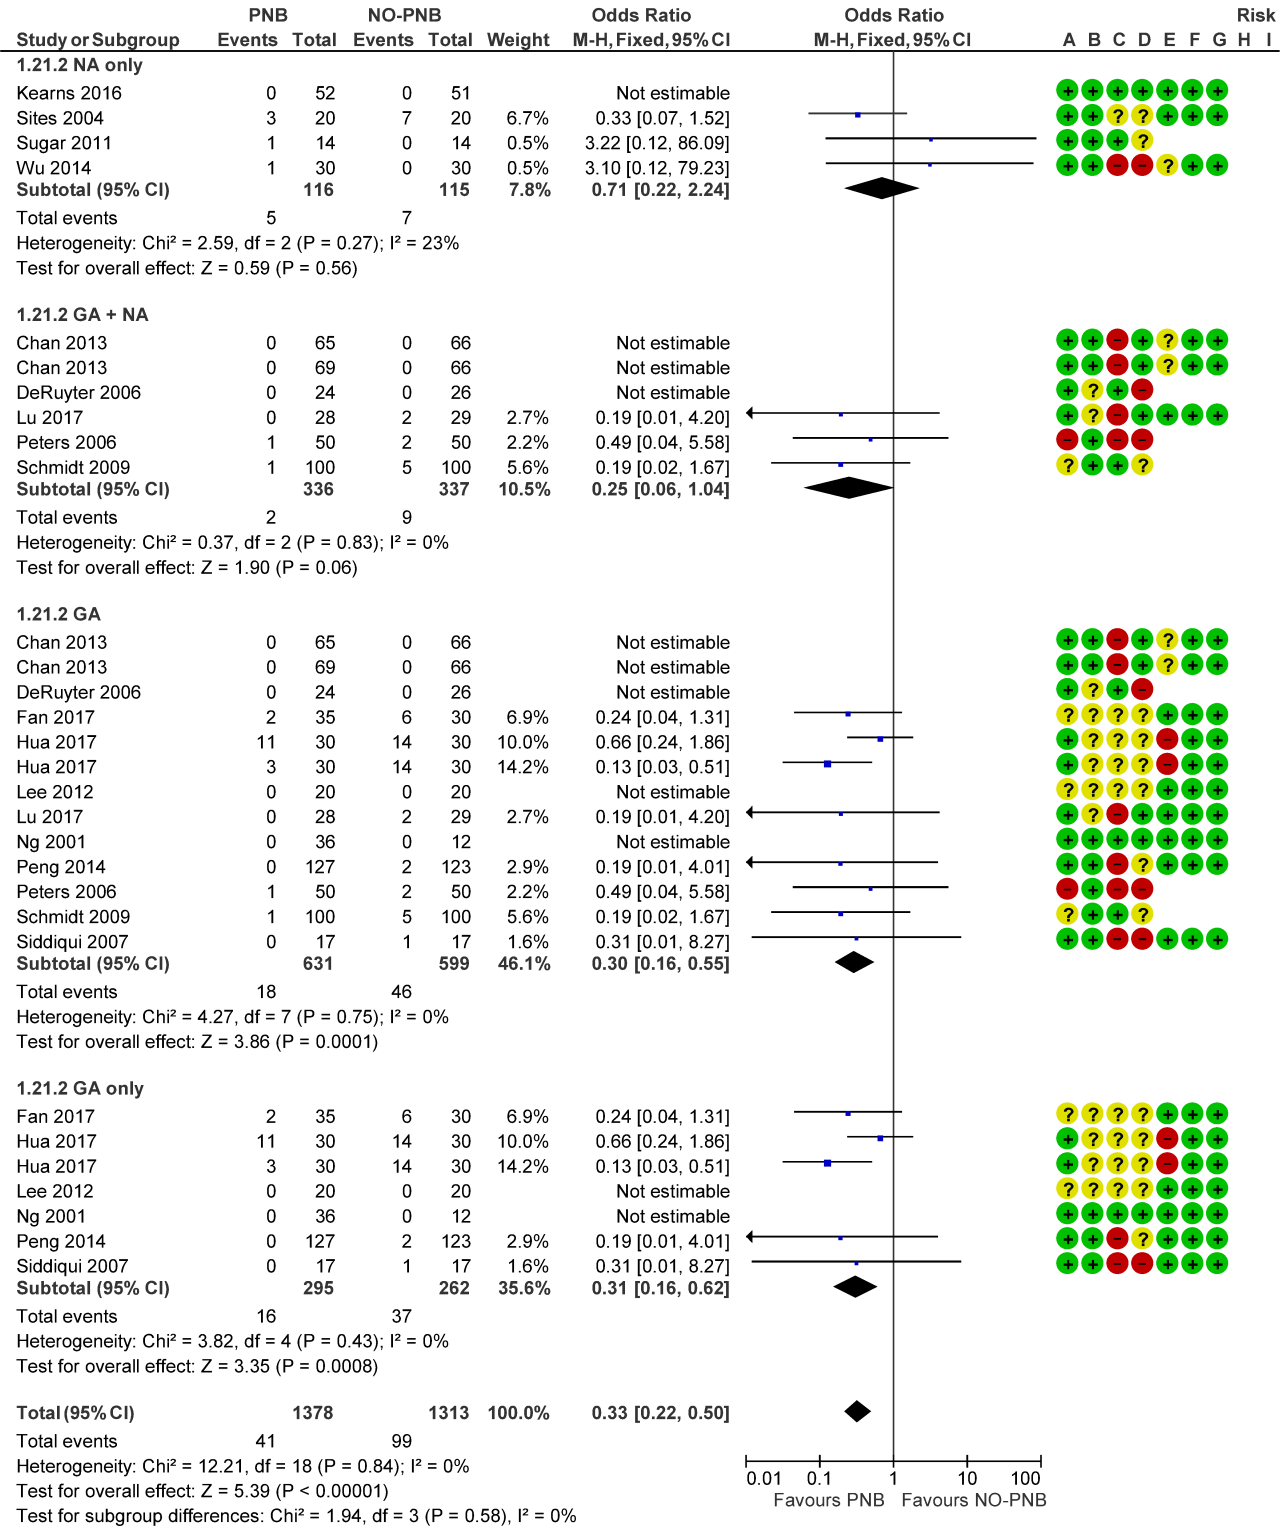

Risk of bias legend

(A) Random sequence generation (selection bias)

Review Manager 5.4.1

## PNB versus no PNB for THA/TKA

23-Feb-2021

- (A) Random sequence generation (selection bias)
- (B) Allocation concealment (selection bias)
- (C) Blinding of participants and personnel (performance bias)
- (D) Blinding of outcome assessment (detection bias)
- (E) Incomplete outcome data (attrition bias)
- (F) Selective reporting (reporting bias)
- (G) Other bias
- (H) Observational Study: Failure to develop and apply appropriate eligibility criteria
- (I) Observational Study: Flawed measurement of exposure or outcome
- (J) Observational Study: Incomplete follow-up
- (K) Observational Study: Failure to adequately control for confounding
- (L) RCT: Selective outcome reporting
- (M) RCT: Sequence Generation
- (N) RCT: Other sources of bias
- (O) RCT: Blinding of outcome assessors
- (P) RCT: Blinding of participants and personnel
- (Q) RCT: Allocation concealment
- (R) RCT: Incomplete outcome data

PNB versus no PNB for THA/TKA

23-Feb-2021

1.22 Respiratory failure (composite) | TKA

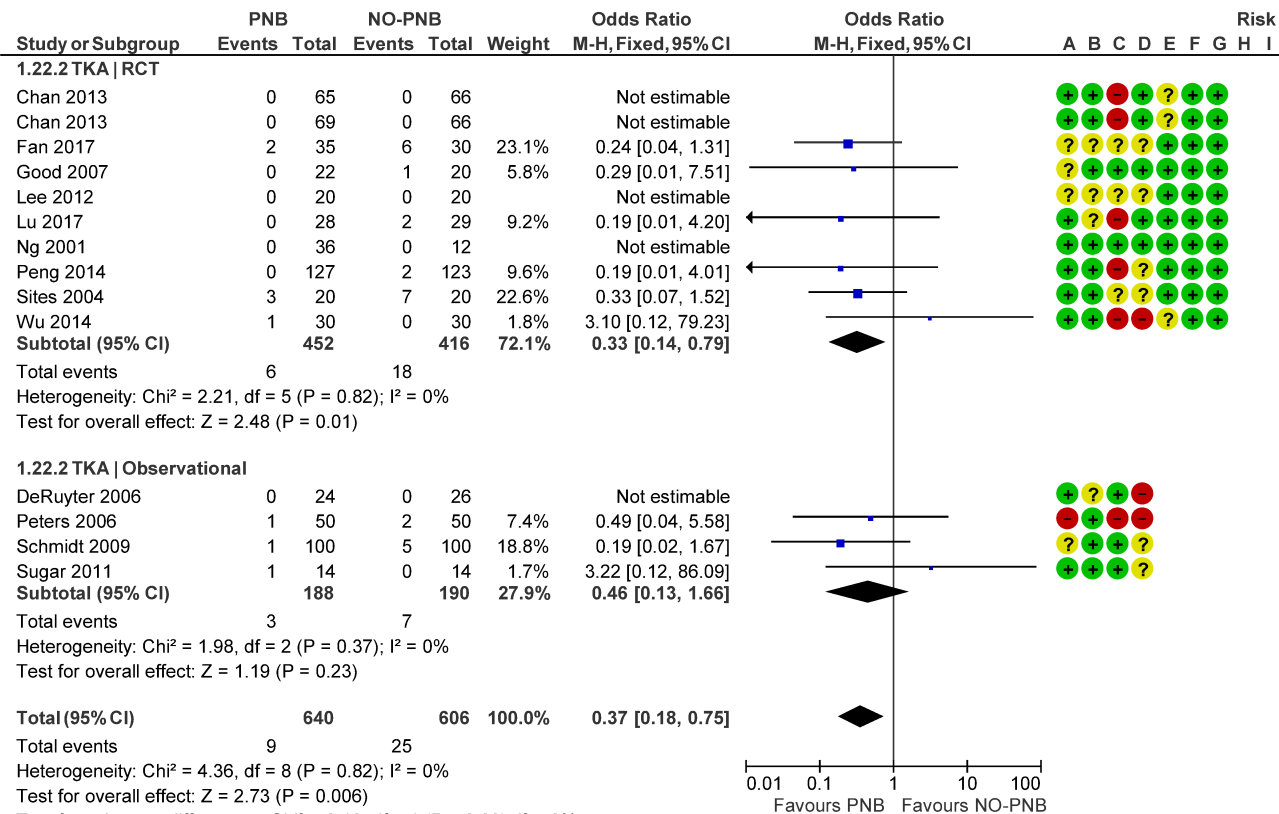

Risk of bias legend

- (A) Random sequence generation (selection bias)
- (B) Allocation concealment (selection bias)
- (C) Blinding of participants and personnel (performance bias)
- (D) Blinding of outcome assessment (detection bias)
- (E) Incomplete outcome data (attrition bias)
- (F) Selective reporting (reporting bias)
- (G) Other bias
- (H) Observational Study: Failure to develop and apply appropriate eligibility criteria
- (I) Observational Study: Flawed measurement of exposure or outcome
- (J) Observational Study: Incomplete follow-up
- (K) Observational Study: Failure to adequately control for confounding
- (L) RCT: Selective outcome reporting
- (M) RCT: Sequence Generation
- (N) RCT: Other sources of bias
- (O) RCT: Blinding of outcome assessors
- (P) RCT: Blinding of participants and personnel
- (Q) RCT: Allocation concealment
- (R) RCT: Incomplete outcome data



PNB versus no PNB for THA/TKA

23-Feb-2021

1.23 Respiratory failure (composite) | Total

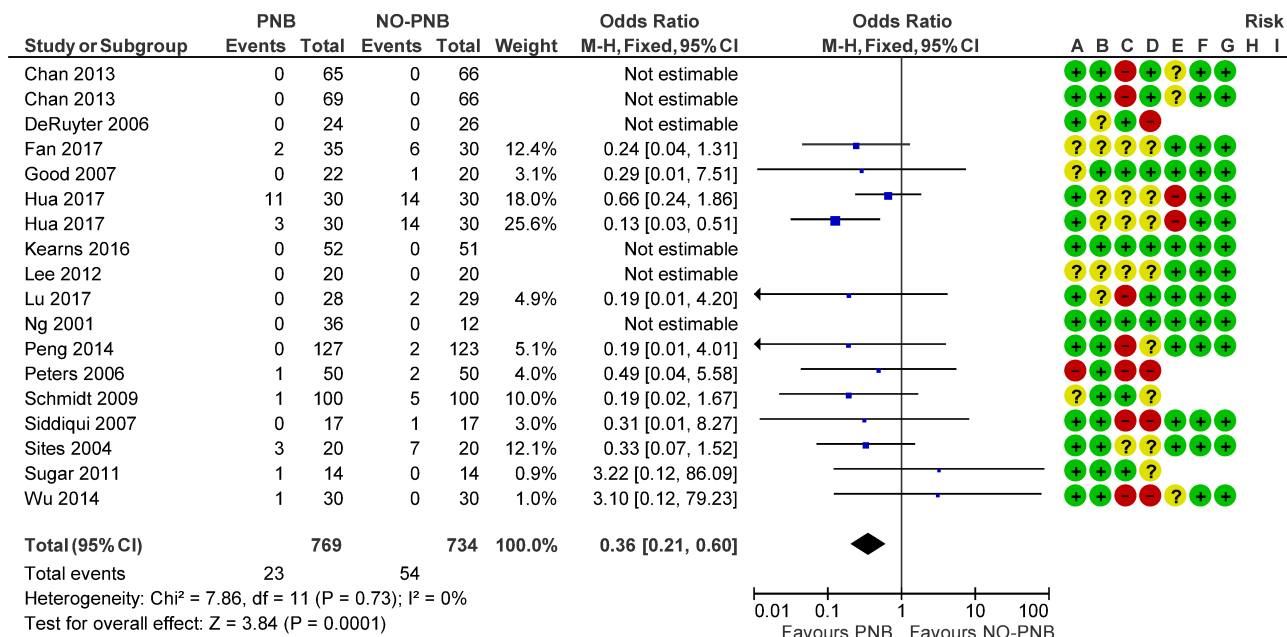

Risk of bias legend

- (A) Random sequence generation (selection bias)
- (B) Allocation concealment (selection bias)
- (C) Blinding of participants and personnel (performance bias)
- (D) Blinding of outcome assessment (detection bias)
- (E) Incomplete outcome data (attrition bias)
- (F) Selective reporting (reporting bias)
- (G) Other bias
- (H) Observational Study: Failure to develop and apply appropriate eligibility criteria
- (I) Observational Study: Flawed measurement of exposure or outcome
- (J) Observational Study: Incomplete follow-up
- (K) Observational Study: Failure to adequately control for confounding
- (L) RCT: Selective outcome reporting
- (M) RCT: Sequence Generation
- (N) RCT: Other sources of bias
- (O) RCT: Blinding of outcome assessors
- (P) RCT: Blinding of participants and personnel
- (Q) RCT: Allocation concealment
- (R) RCT: Incomplete outcome data

## PNB versus no PNB for THA/TKA

23-Feb-2021

## 1.24 Pneumonia | THA

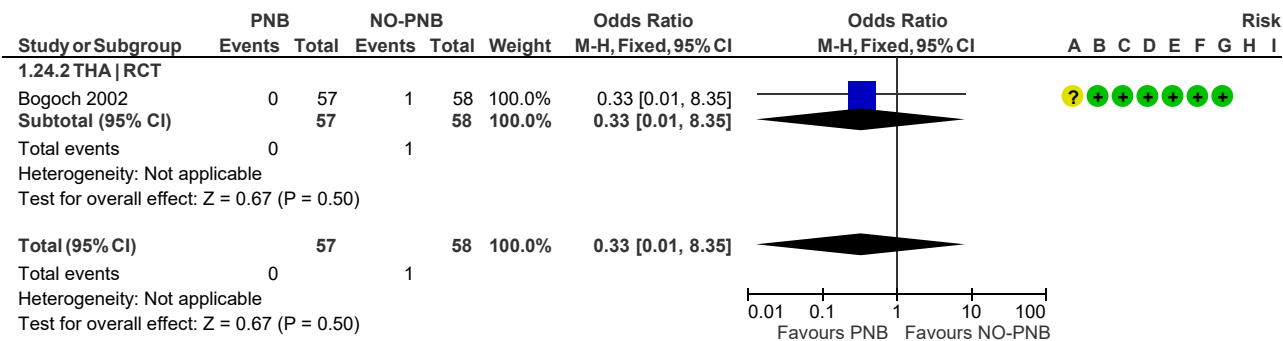Risk of bias legend

- (A) Random sequence generation (selection bias)
- (B) Allocation concealment (selection bias)
- (C) Blinding of participants and personnel (performance bias)
- (D) Blinding of outcome assessment (detection bias)
- (E) Incomplete outcome data (attrition bias)
- (F) Selective reporting (reporting bias)
- (G) Other bias
- (H) Observational Study: Failure to develop and apply appropriate eligibility criteria
- (I) Observational Study: Flawed measurement of exposure or outcome
- (J) Observational Study: Incomplete follow-up
- (K) Observational Study: Failure to adequately control for confounding
- (L) RCT: Selective outcome reporting
- (M) RCT: Sequence Generation
- (N) RCT: Other sources of bias
- (O) RCT: Blinding of outcome assessors
- (P) RCT: Blinding of participants and personnel
- (Q) RCT: Allocation concealment
- (R) RCT: Incomplete outcome data

PNB versus no PNB for THA/TKA

23-Feb-2021

1.25 Pneumonia|GA/NA(THA/TKA)

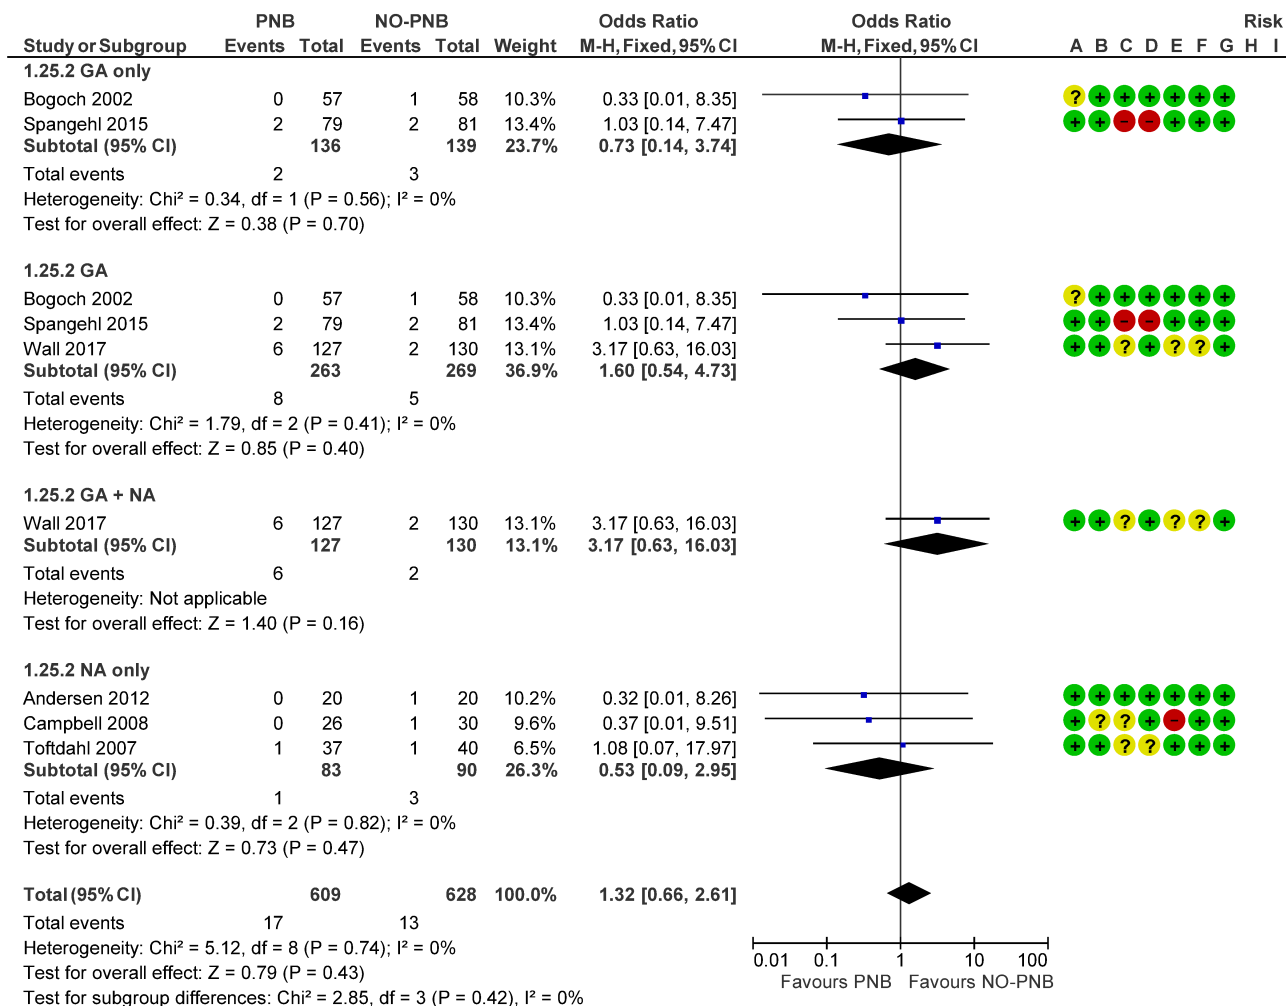

Risk of bias legend

- (A) Random sequence generation (selection bias)
- (B) Allocation concealment (selection bias)
- (C) Blinding of participants and personnel (performance bias)
- (D) Blinding of outcome assessment (detection bias)
- (E) Incomplete outcome data (attrition bias)
- (F) Selective reporting (reporting bias)
- (G) Other bias
- (H) Observational Study: Failure to develop and apply appropriate eligibility criteria
- (I) Observational Study: Flawed measurement of exposure or outcome
- (J) Observational Study: Incomplete follow-up
- (K) Observational Study: Failure to adequately control for confounding
- (L) RCT: Selective outcome reporting
- (M) RCT: Sequence Generation
- (N) RCT: Other sources of bias
- (O) RCT: Blinding of outcome assessors
- (P) RCT: Blinding of participants and personnel
- (Q) RCT: Allocation concealment
- (R) RCT: Incomplete outcome data

PNB versus no PNB for THA/TKA

23-Feb-2021

1.26 Pneumonia | TKA

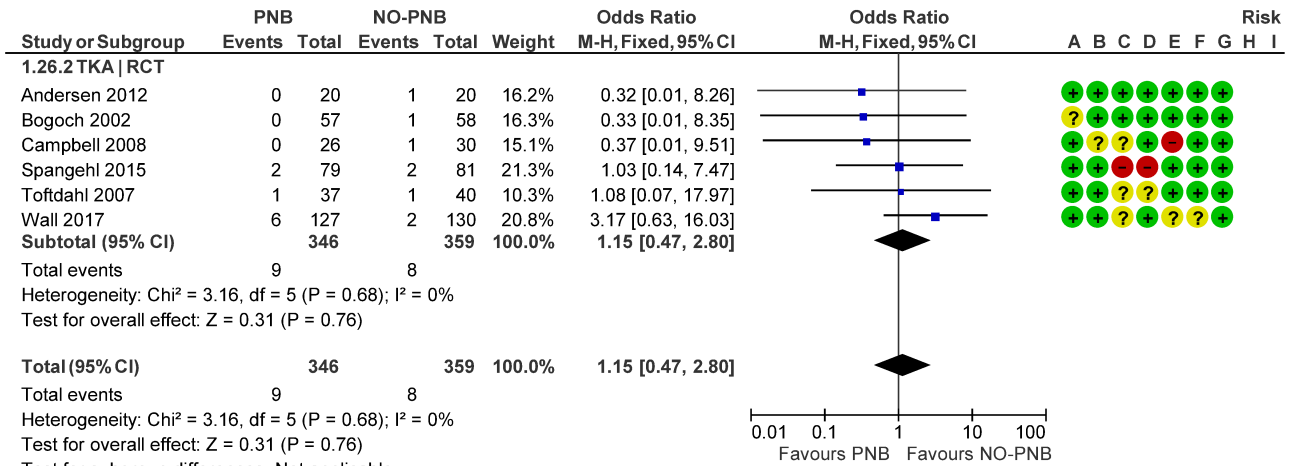

Risk of bias legend

- (A) Random sequence generation (selection bias)
- (B) Allocation concealment (selection bias)
- (C) Blinding of participants and personnel (performance bias)
- (D) Blinding of outcome assessment (detection bias)
- (E) Incomplete outcome data (attrition bias)
- (F) Selective reporting (reporting bias)
- (G) Other bias
- (H) Observational Study: Failure to develop and apply appropriate eligibility criteria
- (I) Observational Study: Flawed measurement of exposure or outcome
- (J) Observational Study: Incomplete follow-up
- (K) Observational Study: Failure to adequately control for confounding
- (L) RCT: Selective outcome reporting
- (M) RCT: Sequence Generation
- (N) RCT: Other sources of bias
- (O) RCT: Blinding of outcome assessors
- (P) RCT: Blinding of participants and personnel
- (Q) RCT: Allocation concealment
- (R) RCT: Incomplete outcome data

PNB versus no PNB for THA/TKA

23-Feb-2021

1.27 Pneumonia | Total

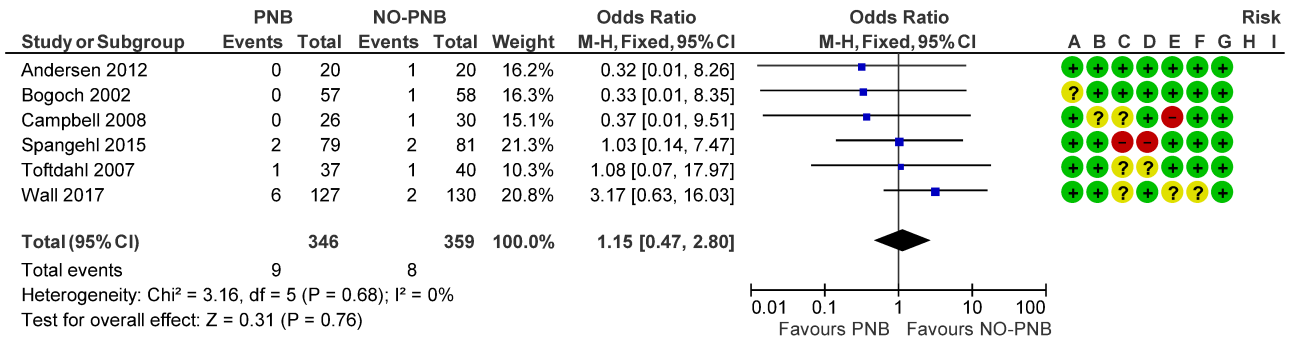

Risk of bias legend

- (A) Random sequence generation (selection bias)
- (B) Allocation concealment (selection bias)
- (C) Blinding of participants and personnel (performance bias)
- (D) Blinding of outcome assessment (detection bias)
- (E) Incomplete outcome data (attrition bias)
- (F) Selective reporting (reporting bias)
- (G) Other bias
- (H) Observational Study: Failure to develop and apply appropriate eligibility criteria
- (I) Observational Study: Flawed measurement of exposure or outcome
- (J) Observational Study: Incomplete follow-up
- (K) Observational Study: Failure to adequately control for confounding
- (L) RCT: Selective outcome reporting
- (M) RCT: Sequence Generation
- (N) RCT: Other sources of bias
- (O) RCT: Blinding of outcome assessors
- (P) RCT: Blinding of participants and personnel
- (Q) RCT: Allocation concealment
- (R) RCT: Incomplete outcome data

PNB versus no PNB for THA/TKA

23-Feb-2021

1.28 Cognitive dysfunction (composite) | GA/NA (THA/TKA)

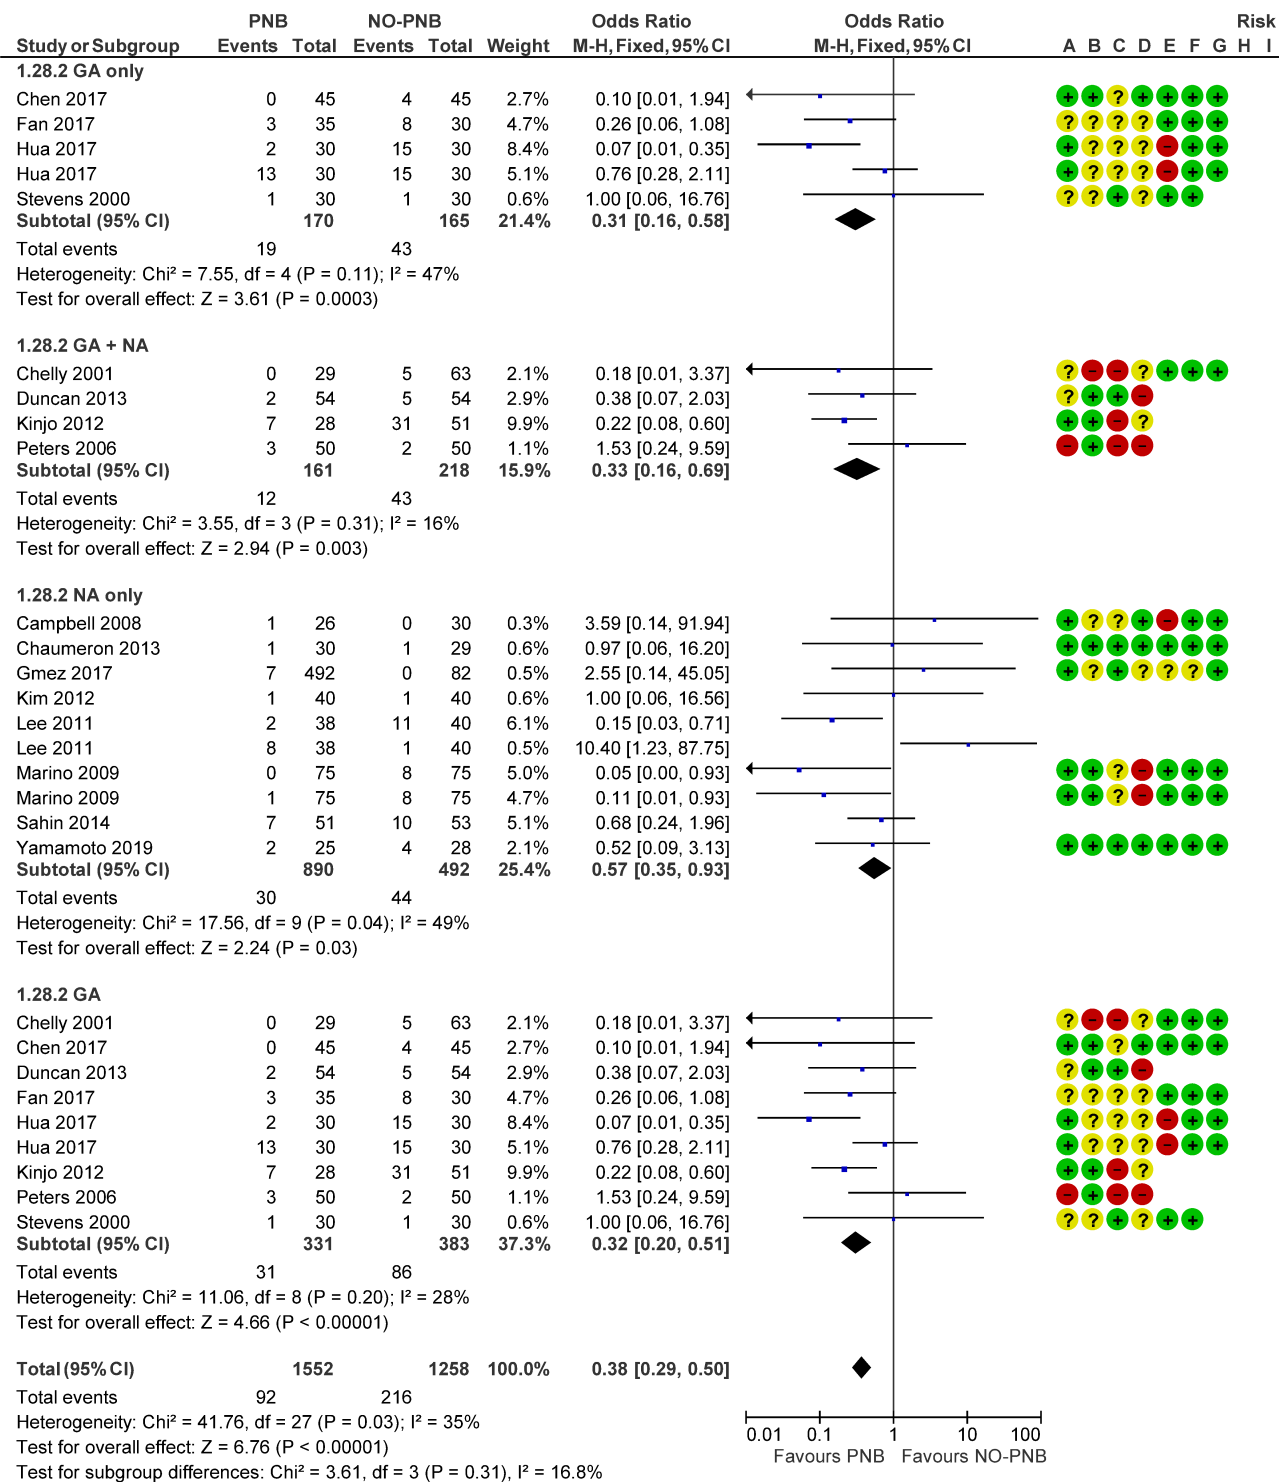

Risk of bias legend

- (A) Random sequence generation (selection bias)
- (B) Allocation concealment (selection bias)
- (C) Blinding of participants and personnel (performance bias)

## PNB versus no PNB for THA/TKA

23-Feb-2021

- (C) Blinding of participants and personnel (performance bias)
- (D) Blinding of outcome assessment (detection bias)
- (E) Incomplete outcome data (attrition bias)
- (F) Selective reporting (reporting bias)
- (G) Other bias
- (H) Observational Study: Failure to develop and apply appropriate eligibility criteria
- (I) Observational Study: Flawed measurement of exposure or outcome
- (J) Observational Study: Incomplete follow-up
- (K) Observational Study: Failure to adequately control for confounding
- (L) RCT: Selective outcome reporting
- (M) RCT: Sequence Generation
- (N) RCT: Other sources of bias
- (O) RCT: Blinding of outcome assessors
- (P) RCT: Blinding of participants and personnel
- (Q) RCT: Allocation concealment
- (R) RCT: Incomplete outcome data

PNB versus no PNB for THA/TKA

23-Feb-2021

1.29 Cognitive dysfunction (composite) | THA

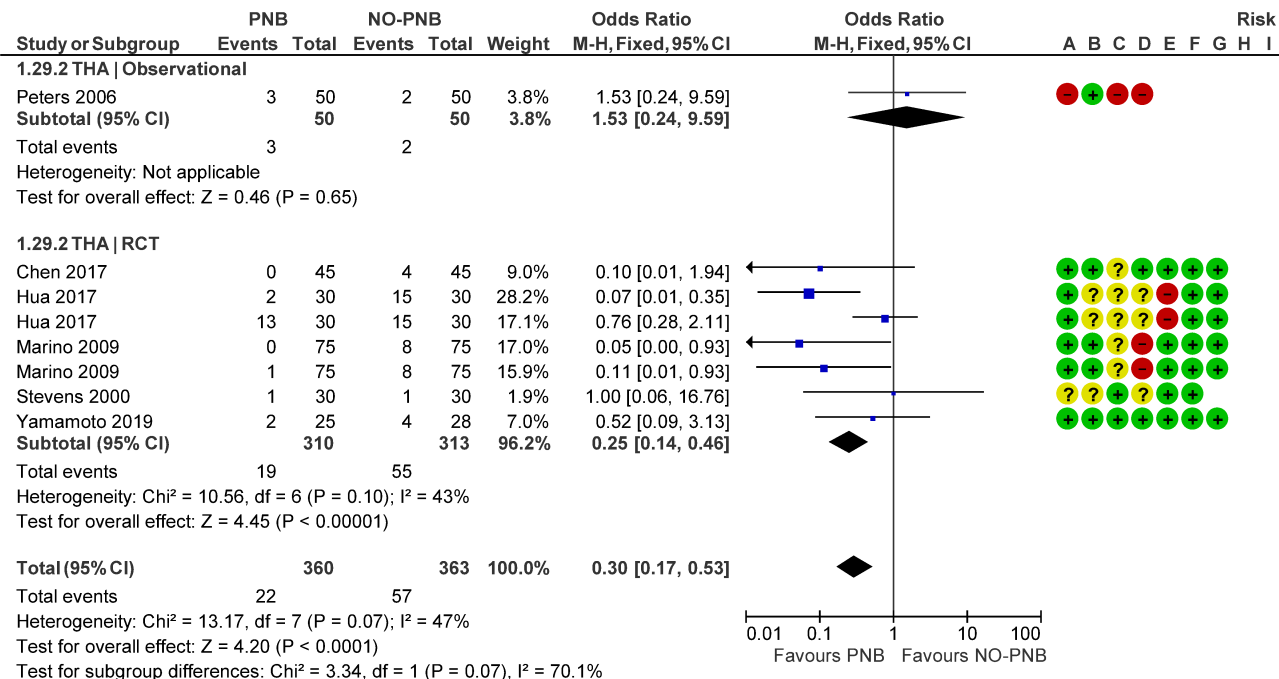

Risk of bias legend

- (A) Random sequence generation (selection bias)
- (B) Allocation concealment (selection bias)
- (C) Blinding of participants and personnel (performance bias)
- (D) Blinding of outcome assessment (detection bias)
- (E) Incomplete outcome data (attrition bias)
- (F) Selective reporting (reporting bias)
- (G) Other bias
- (H) Observational Study: Failure to develop and apply appropriate eligibility criteria
- (I) Observational Study: Flawed measurement of exposure or outcome
- (J) Observational Study: Incomplete follow-up
- (K) Observational Study: Failure to adequately control for confounding
- (L) RCT: Selective outcome reporting
- (M) RCT: Sequence Generation
- (N) RCT: Other sources of bias
- (O) RCT: Blinding of outcome assessors
- (P) RCT: Blinding of participants and personnel
- (Q) RCT: Allocation concealment
- (R) RCT: Incomplete outcome data



PNB versus no PNB for THA/TKA

23-Feb-2021

1.30 Cognitive dysfunction (composite) | TKA

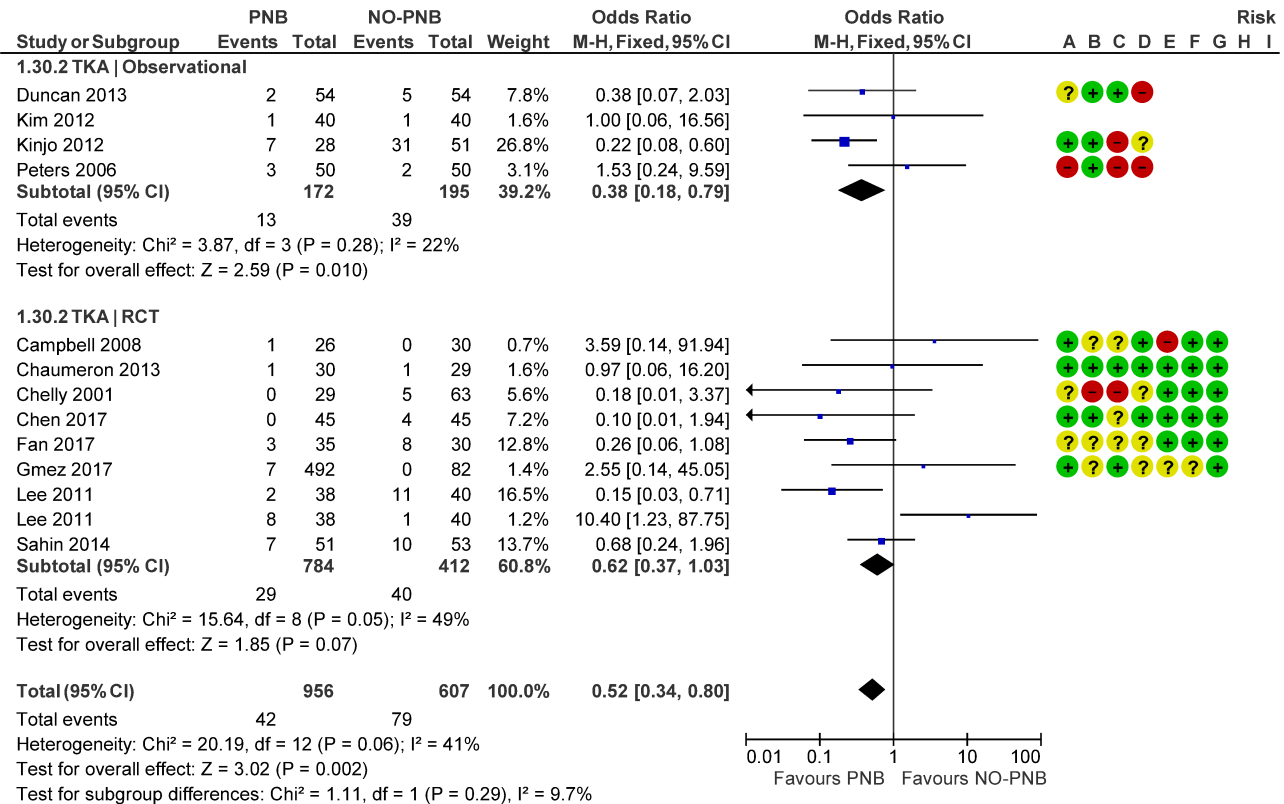

Risk of bias legend

- (A) Random sequence generation (selection bias)
- (B) Allocation concealment (selection bias)
- (C) Blinding of participants and personnel (performance bias)
- (D) Blinding of outcome assessment (detection bias)
- (E) Incomplete outcome data (attrition bias)
- (F) Selective reporting (reporting bias)
- (G) Other bias
- (H) Observational Study: Failure to develop and apply appropriate eligibility criteria
- (I) Observational Study: Flawed measurement of exposure or outcome
- (J) Observational Study: Incomplete follow-up
- (K) Observational Study: Failure to adequately control for confounding
- (L) RCT: Selective outcome reporting
- (M) RCT: Sequence Generation
- (N) RCT: Other sources of bias
- (O) RCT: Blinding of outcome assessors
- (P) RCT: Blinding of participants and personnel
- (Q) RCT: Allocation concealment
- (R) RCT: Incomplete outcome data

PNB versus no PNB for THA/TKA

23-Feb-2021

1.31 Cognitive dysfunction (composite) | Total

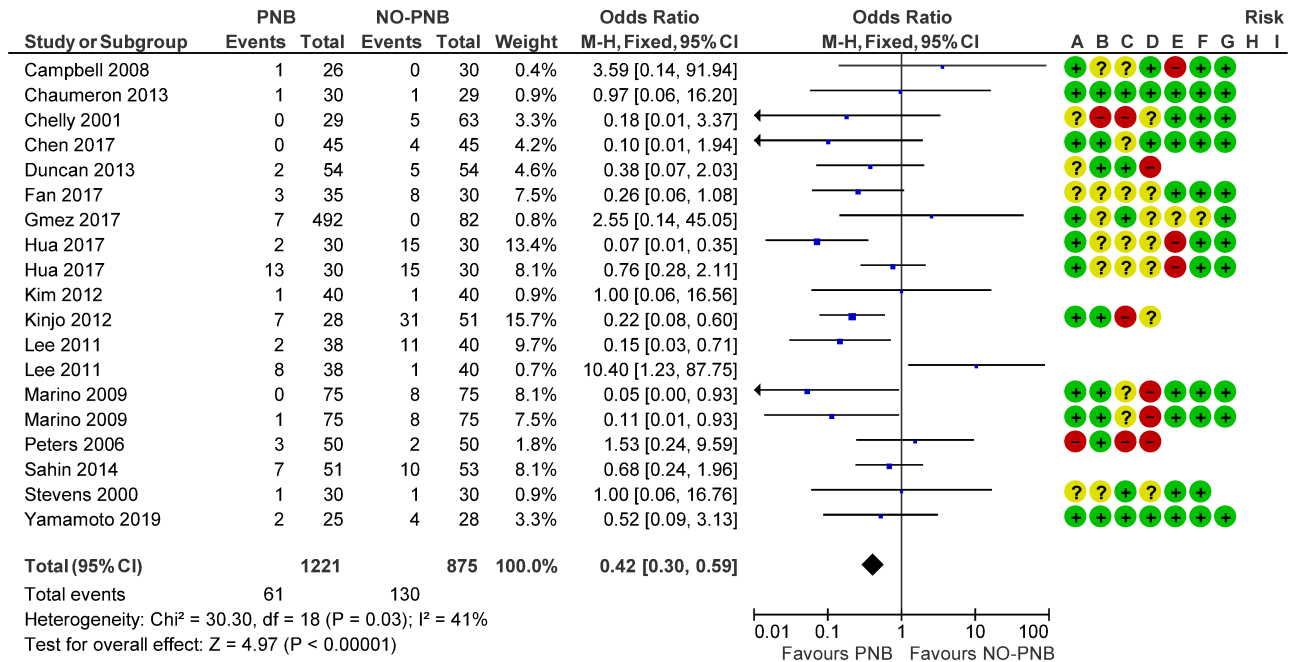

Risk of bias legend

- (A) Random sequence generation (selection bias)
- (B) Allocation concealment (selection bias)
- (C) Blinding of participants and personnel (performance bias)
- (D) Blinding of outcome assessment (detection bias)
- (E) Incomplete outcome data (attrition bias)
- (F) Selective reporting (reporting bias)
- (G) Other bias
- (H) Observational Study: Failure to develop and apply appropriate eligibility criteria
- (I) Observational Study: Flawed measurement of exposure or outcome
- (J) Observational Study: Incomplete follow-up
- (K) Observational Study: Failure to adequately control for confounding
- (L) RCT: Selective outcome reporting
- (M) RCT: Sequence Generation
- (N) RCT: Other sources of bias
- (O) RCT: Blinding of outcome assessors
- (P) RCT: Blinding of participants and personnel
- (Q) RCT: Allocation concealment
- (R) RCT: Incomplete outcome data

PNB versus no PNB for THA/TKA

23-Feb-2021

1.32 Delirium | THA

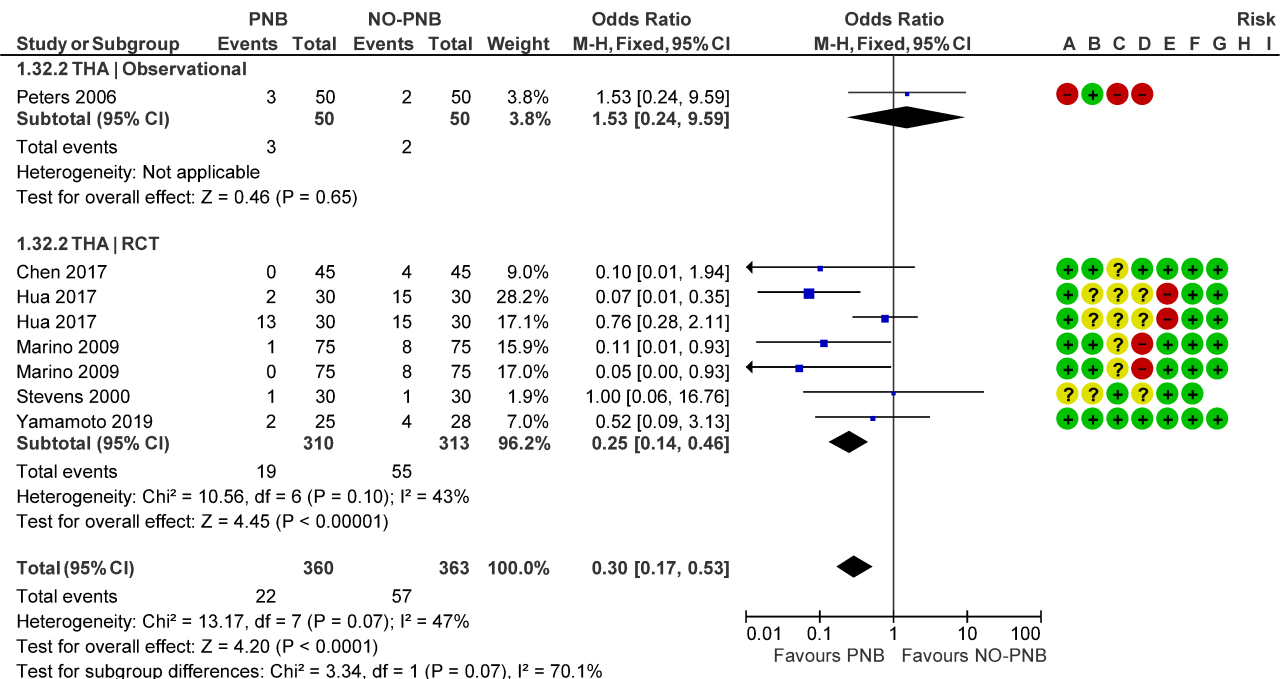

Risk of bias legend

- (A) Random sequence generation (selection bias)
- (B) Allocation concealment (selection bias)
- (C) Blinding of participants and personnel (performance bias)
- (D) Blinding of outcome assessment (detection bias)
- (E) Incomplete outcome data (attrition bias)
- (F) Selective reporting (reporting bias)
- (G) Other bias
- (H) Observational Study: Failure to develop and apply appropriate eligibility criteria
- (I) Observational Study: Flawed measurement of exposure or outcome
- (J) Observational Study: Incomplete follow-up
- (K) Observational Study: Failure to adequately control for confounding
- (L) RCT: Selective outcome reporting
- (M) RCT: Sequence Generation
- (N) RCT: Other sources of bias
- (O) RCT: Blinding of outcome assessors
- (P) RCT: Blinding of participants and personnel
- (Q) RCT: Allocation concealment
- (R) RCT: Incomplete outcome data

PNB versus no PNB for THA/TKA

23-Feb-2021

1.33 Delirium | TKA

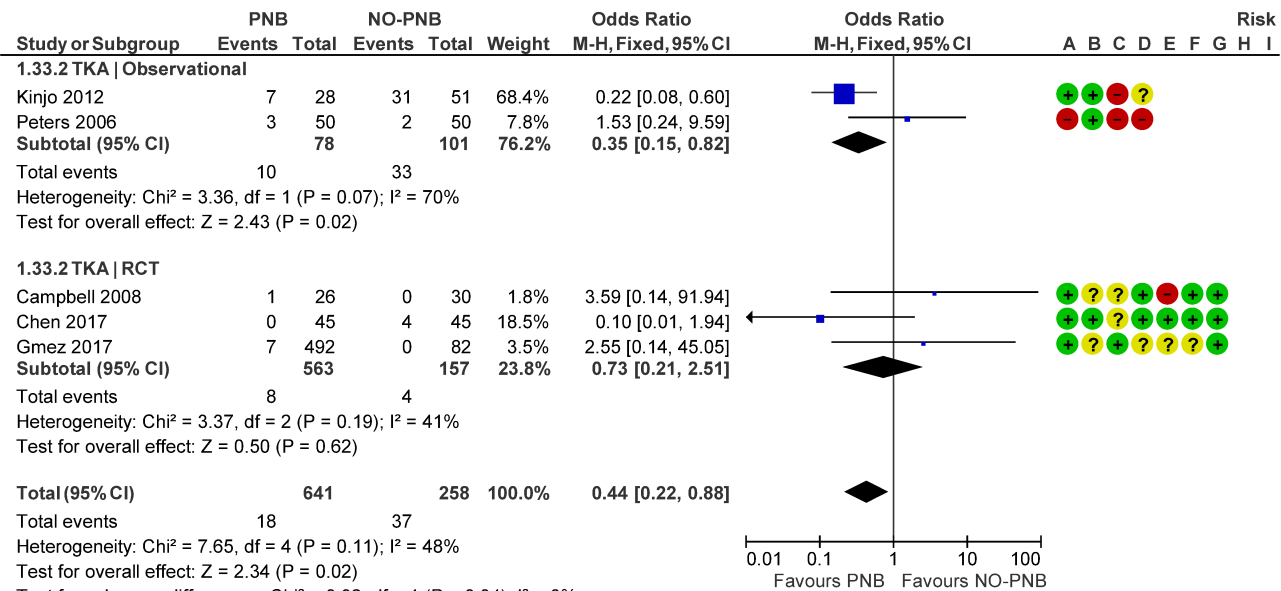

Risk of bias legend

- (A) Random sequence generation (selection bias)
- (B) Allocation concealment (selection bias)
- (C) Blinding of participants and personnel (performance bias)
- (D) Blinding of outcome assessment (detection bias)
- (E) Incomplete outcome data (attrition bias)
- (F) Selective reporting (reporting bias)
- (G) Other bias
- (H) Observational Study: Failure to develop and apply appropriate eligibility criteria
- (I) Observational Study: Flawed measurement of exposure or outcome
- (J) Observational Study: Incomplete follow-up
- (K) Observational Study: Failure to adequately control for confounding
- (L) RCT: Selective outcome reporting
- (M) RCT: Sequence Generation
- (N) RCT: Other sources of bias
- (O) RCT: Blinding of outcome assessors
- (P) RCT: Blinding of participants and personnel
- (Q) RCT: Allocation concealment
- (R) RCT: Incomplete outcome data

PNB versus no PNB for THA/TKA

23-Feb-2021

1.34 Delirium | Total

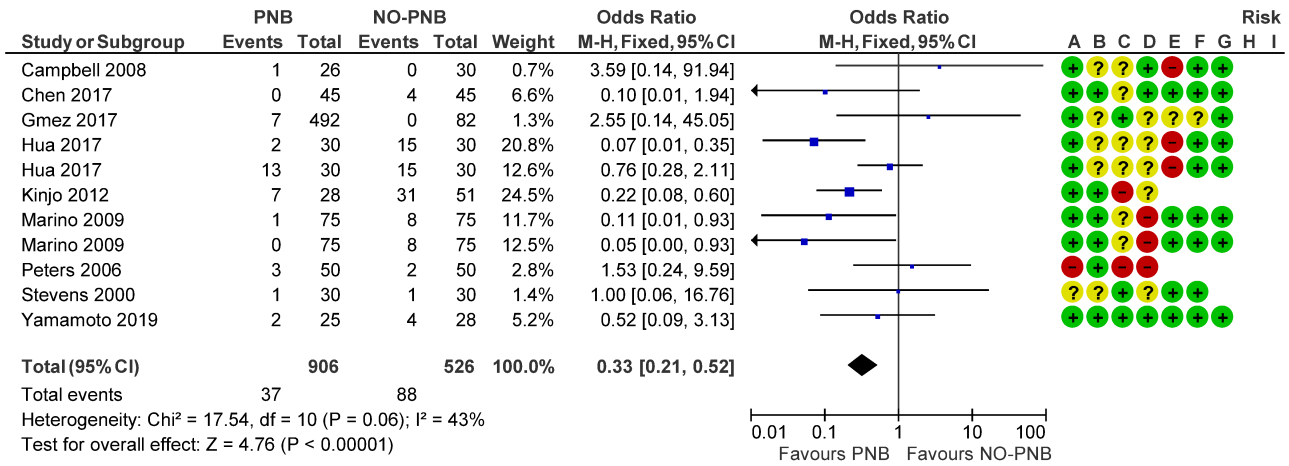

Risk of bias legend

- (A) Random sequence generation (selection bias)
- (B) Allocation concealment (selection bias)
- (C) Blinding of participants and personnel (performance bias)
- (D) Blinding of outcome assessment (detection bias)
- (E) Incomplete outcome data (attrition bias)
- (F) Selective reporting (reporting bias)
- (G) Other bias
- (H) Observational Study: Failure to develop and apply appropriate eligibility criteria
- (I) Observational Study: Flawed measurement of exposure or outcome
- (J) Observational Study: Incomplete follow-up
- (K) Observational Study: Failure to adequately control for confounding
- (L) RCT: Selective outcome reporting
- (M) RCT: Sequence Generation
- (N) RCT: Other sources of bias
- (O) RCT: Blinding of outcome assessors
- (P) RCT: Blinding of participants and personnel
- (Q) RCT: Allocation concealment
- (R) RCT: Incomplete outcome data

PNB versus no PNB for THA/TKA

23-Feb-2021

1.35 Delirium | GA/NA (THA/TKA)

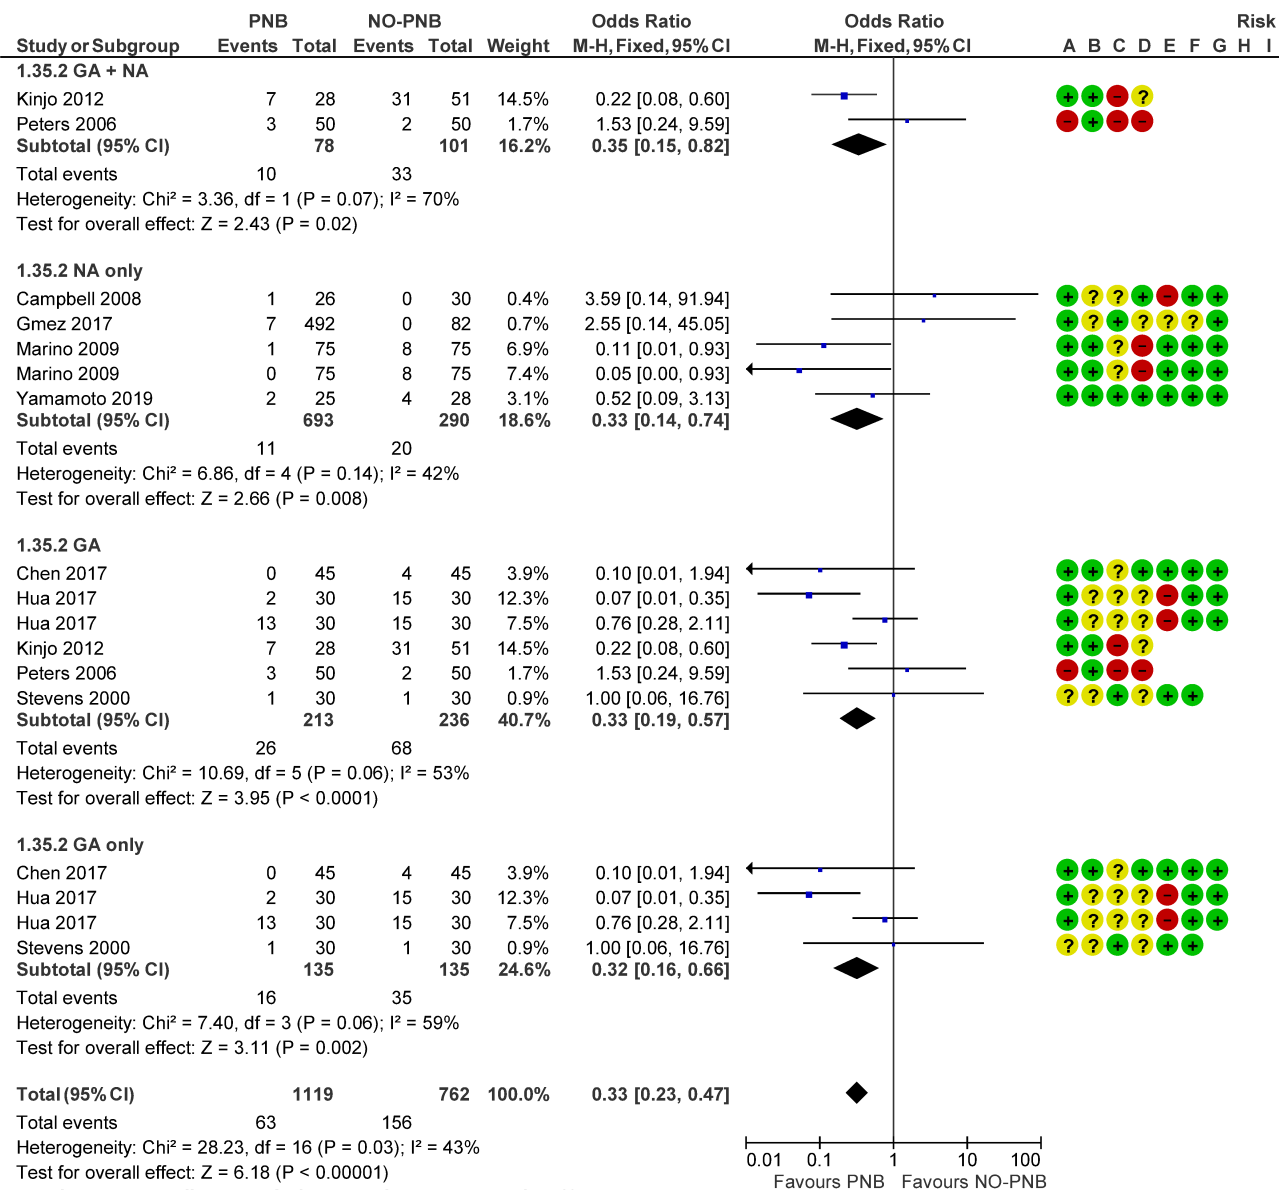

Risk of bias legend

- (A) Random sequence generation (selection bias)
- (B) Allocation concealment (selection bias)
- (C) Blinding of participants and personnel (performance bias)
- (D) Blinding of outcome assessment (detection bias)
- (E) Incomplete outcome data (attrition bias)
- (F) Selective reporting (reporting bias)
- (G) Other bias
- (H) Observational Study: Failure to develop and apply appropriate eligibility criteria
- (I) Observational Study: Flawed measurement of exposure or outcome
- (J) Observational Study: Incomplete follow-up
- (K) Observational Study: Failure to adequately control for confounding
- (L) RCT: Selective outcome reporting
- (M) RCT: Sequence Generation
- (N) RCT: Other sources of bias

PNB versus no PNB for THA/TKA

23-Feb-2021

- (N) RCT: Other sources of bias
- (O) RCT: Blinding of outcome assessors
- (P) RCT: Blinding of participants and personnel
- (Q) RCT: Allocation concealment
- (R) RCT: Incomplete outcome data

1.36 Stroke | THA

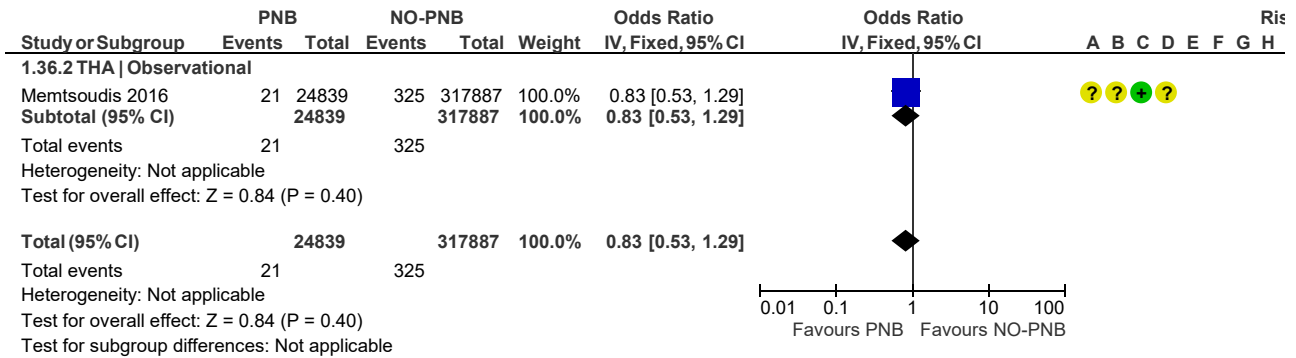

Risk of bias legend

- (A) Random sequence generation (selection bias)
- (B) Allocation concealment (selection bias)
- (C) Blinding of participants and personnel (performance bias)
- (D) Blinding of outcome assessment (detection bias)
- (E) Incomplete outcome data (attrition bias)
- (F) Selective reporting (reporting bias)
- (G) Other bias
- (H) Observational Study: Failure to develop and apply appropriate eligibility criteria
- (I) Observational Study: Flawed measurement of exposure or outcome
- (J) Observational Study: Incomplete follow-up
- (K) Observational Study: Failure to adequately control for confounding
- (L) RCT: Selective outcome reporting
- (M) RCT: Sequence Generation
- (N) RCT: Other sources of bias
- (O) RCT: Blinding of outcome assessors
- (P) RCT: Blinding of participants and personnel
- (Q) RCT: Allocation concealment
- (R) RCT: Incomplete outcome data

PNB versus no PNB for THA/TKA

23-Feb-2021

1.37 Stroke | TKA

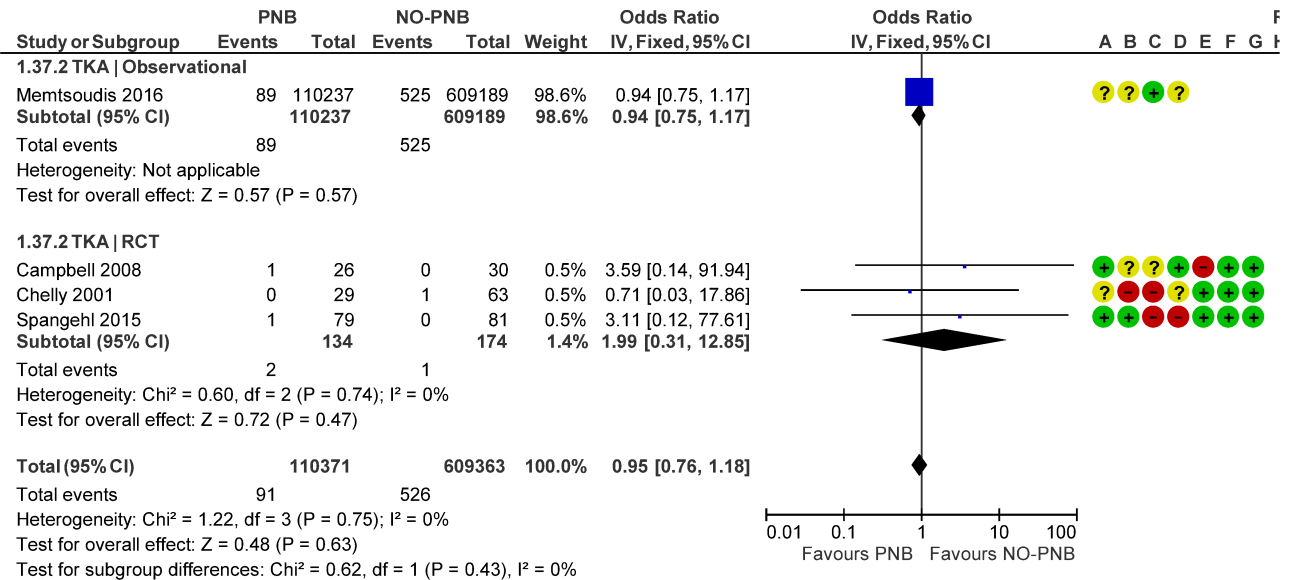

Risk of bias legend

- (A) Random sequence generation (selection bias)
- (B) Allocation concealment (selection bias)
- (C) Blinding of participants and personnel (performance bias)
- (D) Blinding of outcome assessment (detection bias)
- (E) Incomplete outcome data (attrition bias)
- (F) Selective reporting (reporting bias)
- (G) Other bias
- (H) Observational Study: Failure to develop and apply appropriate eligibility criteria
- (I) Observational Study: Flawed measurement of exposure or outcome
- (J) Observational Study: Incomplete follow-up
- (K) Observational Study: Failure to adequately control for confounding
- (L) RCT: Selective outcome reporting
- (M) RCT: Sequence Generation
- (N) RCT: Other sources of bias
- (O) RCT: Blinding of outcome assessors
- (P) RCT: Blinding of participants and personnel
- (Q) RCT: Allocation concealment
- (R) RCT: Incomplete outcome data



PNB versus no PNB for THA/TKA

23-Feb-2021

1.38 Stroke | Total

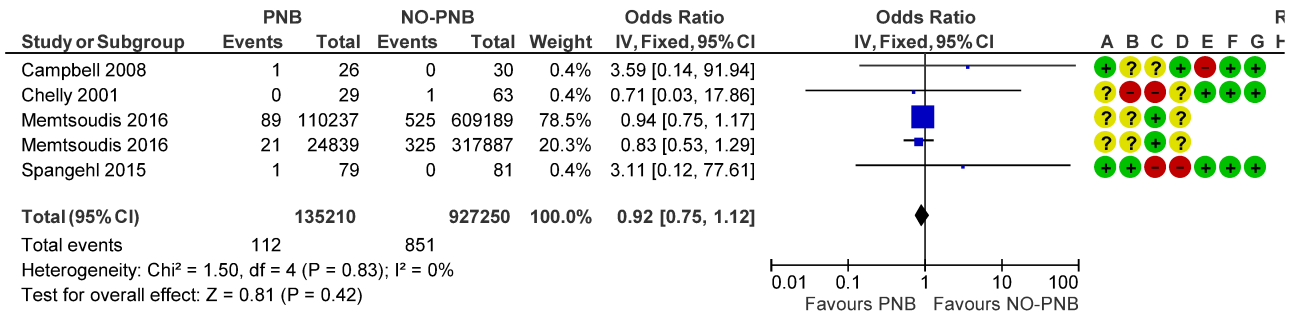

Risk of bias legend

- (A) Random sequence generation (selection bias)
- (B) Allocation concealment (selection bias)
- (C) Blinding of participants and personnel (performance bias)
- (D) Blinding of outcome assessment (detection bias)
- (E) Incomplete outcome data (attrition bias)
- (F) Selective reporting (reporting bias)
- (G) Other bias
- (H) Observational Study: Failure to develop and apply appropriate eligibility criteria
- (I) Observational Study: Flawed measurement of exposure or outcome
- (J) Observational Study: Incomplete follow-up
- (K) Observational Study: Failure to adequately control for confounding
- (L) RCT: Selective outcome reporting
- (M) RCT: Sequence Generation
- (N) RCT: Other sources of bias
- (O) RCT: Blinding of outcome assessors
- (P) RCT: Blinding of participants and personnel
- (Q) RCT: Allocation concealment
- (R) RCT: Incomplete outcome data

PNB versus no PNB for THA/TKA

23-Feb-2021

1.39 Stroke | GA/NA (THA/TKA)

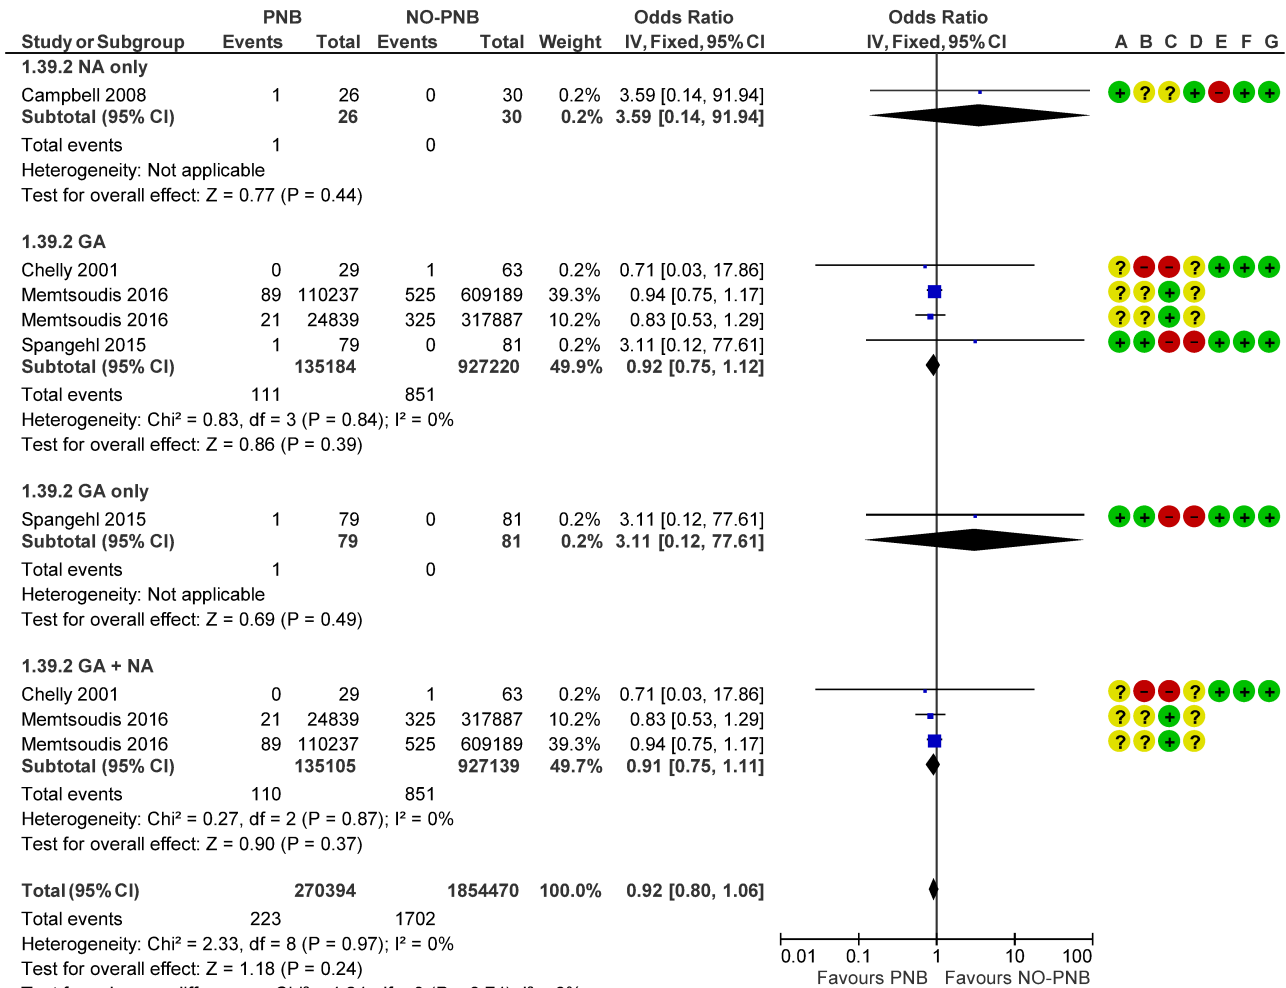

Risk of bias legend

- (A) Random sequence generation (selection bias)
- (B) Allocation concealment (selection bias)
- (C) Blinding of participants and personnel (performance bias)
- (D) Blinding of outcome assessment (detection bias)
- (E) Incomplete outcome data (attrition bias)
- (F) Selective reporting (reporting bias)
- (G) Other bias
- (H) Observational Study: Failure to develop and apply appropriate eligibility criteria
- (I) Observational Study: Flawed measurement of exposure or outcome
- (J) Observational Study: Incomplete follow-up
- (K) Observational Study: Failure to adequately control for confounding
- (L) RCT: Selective outcome reporting
- (M) RCT: Sequence Generation
- (N) RCT: Other sources of bias
- (O) RCT: Blinding of outcome assessors
- (P) RCT: Blinding of participants and personnel
- (Q) RCT: Allocation concealment
- (R) RCT: Incomplete outcome data

PNB versus no PNB for THA/TKA

23-Feb-2021

1.40 Perioperative Nerve Injury | THA

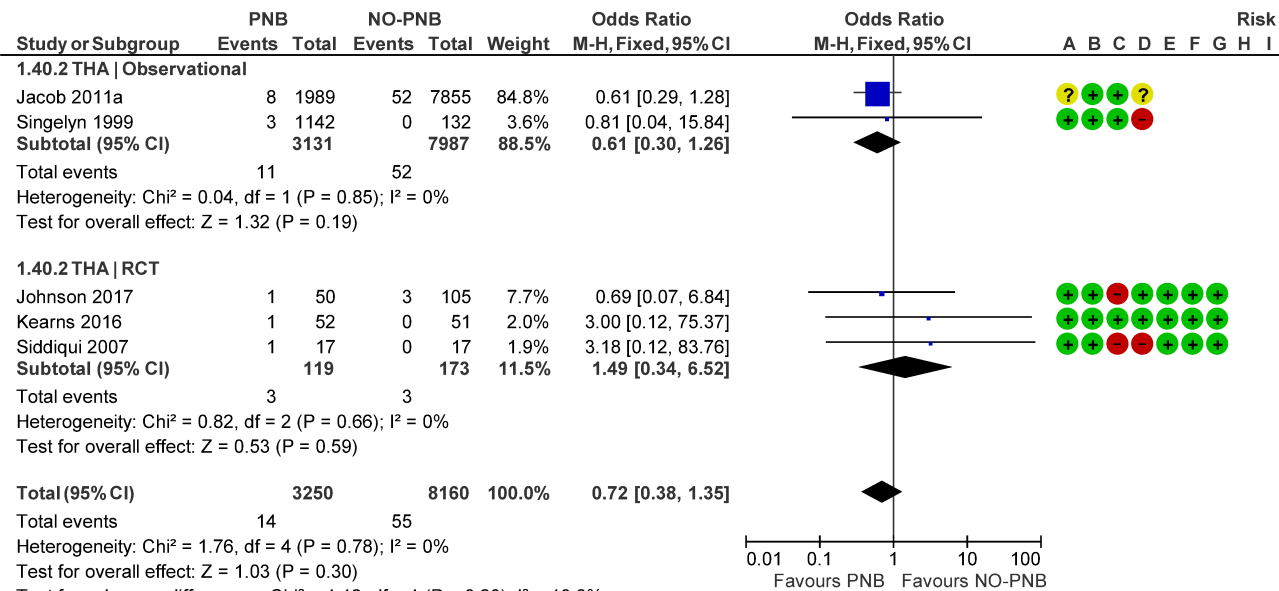

Risk of bias legend

- (A) Random sequence generation (selection bias)
- (B) Allocation concealment (selection bias)
- (C) Blinding of participants and personnel (performance bias)
- (D) Blinding of outcome assessment (detection bias)
- (E) Incomplete outcome data (attrition bias)
- (F) Selective reporting (reporting bias)
- (G) Other bias
- (H) Observational Study: Failure to develop and apply appropriate eligibility criteria
- (I) Observational Study: Flawed measurement of exposure or outcome
- (J) Observational Study: Incomplete follow-up
- (K) Observational Study: Failure to adequately control for confounding
- (L) RCT: Selective outcome reporting
- (M) RCT: Sequence Generation
- (N) RCT: Other sources of bias
- (O) RCT: Blinding of outcome assessors
- (P) RCT: Blinding of participants and personnel
- (Q) RCT: Allocation concealment
- (R) RCT: Incomplete outcome data

PNB versus no PNB for THA/TKA

23-Feb-2021

1.41 Perioperative Nerve Injury | TKA

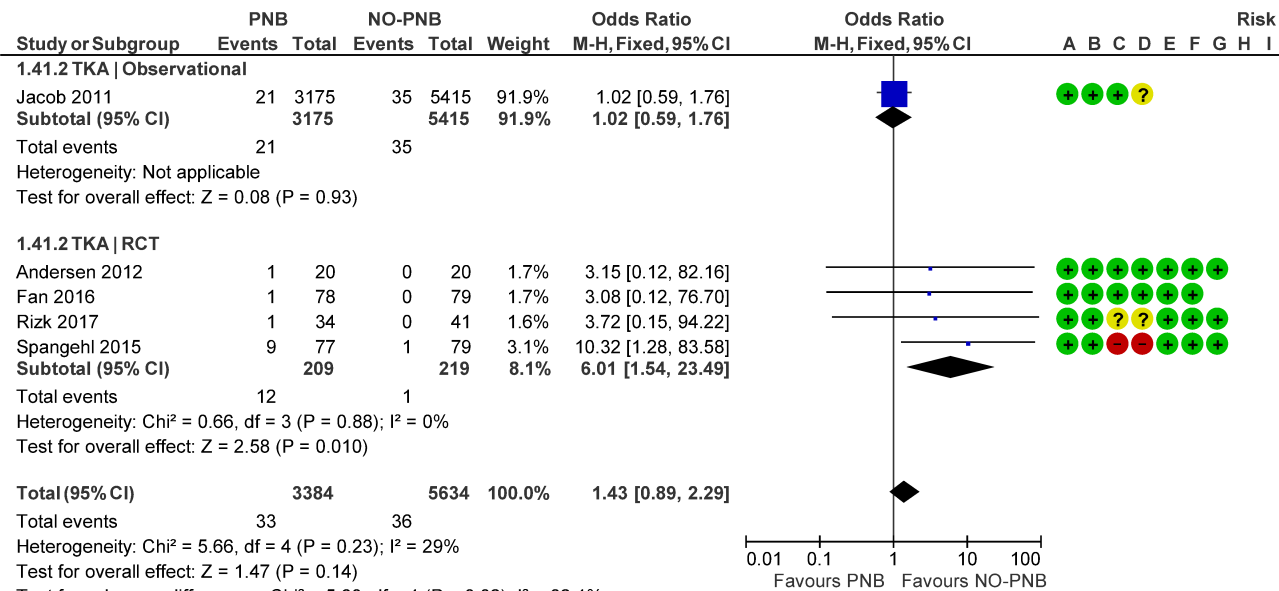

Risk of bias legend

- (A) Random sequence generation (selection bias)
- (B) Allocation concealment (selection bias)
- (C) Blinding of participants and personnel (performance bias)
- (D) Blinding of outcome assessment (detection bias)
- (E) Incomplete outcome data (attrition bias)
- (F) Selective reporting (reporting bias)
- (G) Other bias
- (H) Observational Study: Failure to develop and apply appropriate eligibility criteria
- (I) Observational Study: Flawed measurement of exposure or outcome
- (J) Observational Study: Incomplete follow-up
- (K) Observational Study: Failure to adequately control for confounding
- (L) RCT: Selective outcome reporting
- (M) RCT: Sequence Generation
- (N) RCT: Other sources of bias
- (O) RCT: Blinding of outcome assessors
- (P) RCT: Blinding of participants and personnel
- (Q) RCT: Allocation concealment
- (R) RCT: Incomplete outcome data

PNB versus no PNB for THA/TKA

23-Feb-2021

1.42 Perioperative Nerve Injury | GA/NA (THA/TKA)

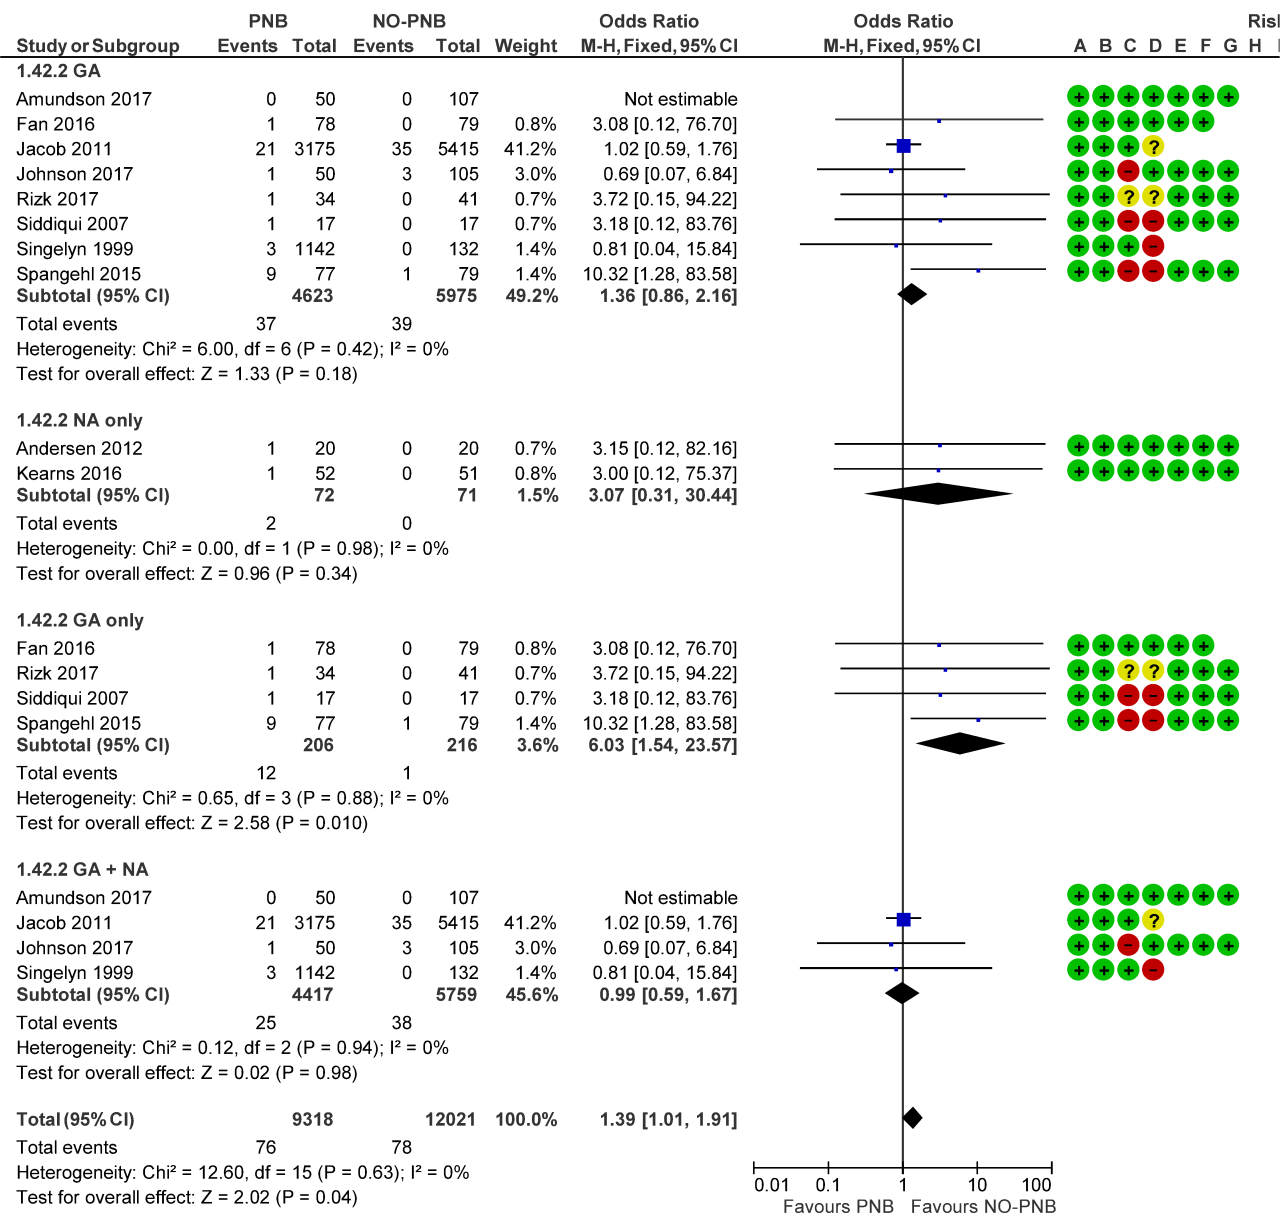

Risk of bias legend

- (A) Random sequence generation (selection bias)
- (B) Allocation concealment (selection bias)
- (C) Blinding of participants and personnel (performance bias)
- (D) Blinding of outcome assessment (detection bias)
- (E) Incomplete outcome data (attrition bias)
- (F) Selective reporting (reporting bias)
- (G) Other bias
- (H) Observational Study: Failure to develop and apply appropriate eligibility criteria
- (I) Observational Study: Flawed measurement of exposure or outcome
- (J) Observational Study: Incomplete follow-up
- (K) Observational Study: Failure to adequately control for confounding
- (L) RCT: Selective outcome reporting
- (M) RCT: Sequence Generation

## PNB versus no PNB for THA/TKA

23-Feb-2021

---

(M) RCT: Sequence generation

(N) RCT: Other sources of bias

(O) RCT: Blinding of outcome assessors

(P) RCT: Blinding of participants and personnel

(Q) RCT: Allocation concealment

(R) RCT: Incomplete outcome data

PNB versus no PNB for THA/TKA

23-Feb-2021

1.43 Perioperative Nerve Injury | Total

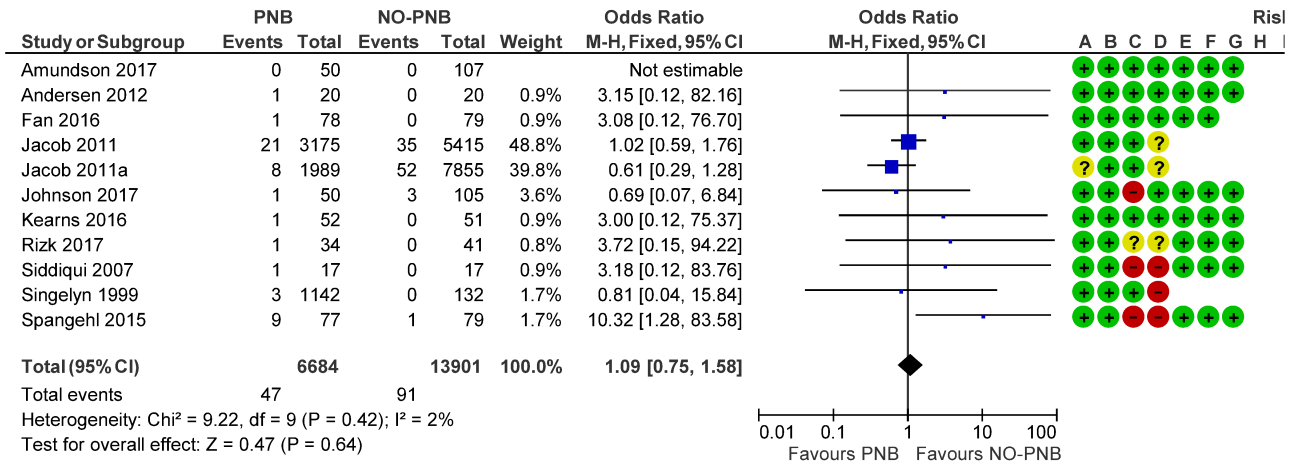

Risk of bias legend

- (A) Random sequence generation (selection bias)
- (B) Allocation concealment (selection bias)
- (C) Blinding of participants and personnel (performance bias)
- (D) Blinding of outcome assessment (detection bias)
- (E) Incomplete outcome data (attrition bias)
- (F) Selective reporting (reporting bias)
- (G) Other bias
- (H) Observational Study: Failure to develop and apply appropriate eligibility criteria
- (I) Observational Study: Flawed measurement of exposure or outcome
- (J) Observational Study: Incomplete follow-up
- (K) Observational Study: Failure to adequately control for confounding
- (L) RCT: Selective outcome reporting
- (M) RCT: Sequence Generation
- (N) RCT: Other sources of bias
- (O) RCT: Blinding of outcome assessors
- (P) RCT: Blinding of participants and personnel
- (Q) RCT: Allocation concealment
- (R) RCT: Incomplete outcome data

PNB versus no PNB for THA/TKA

23-Feb-2021

1.44 Sepsis | THA

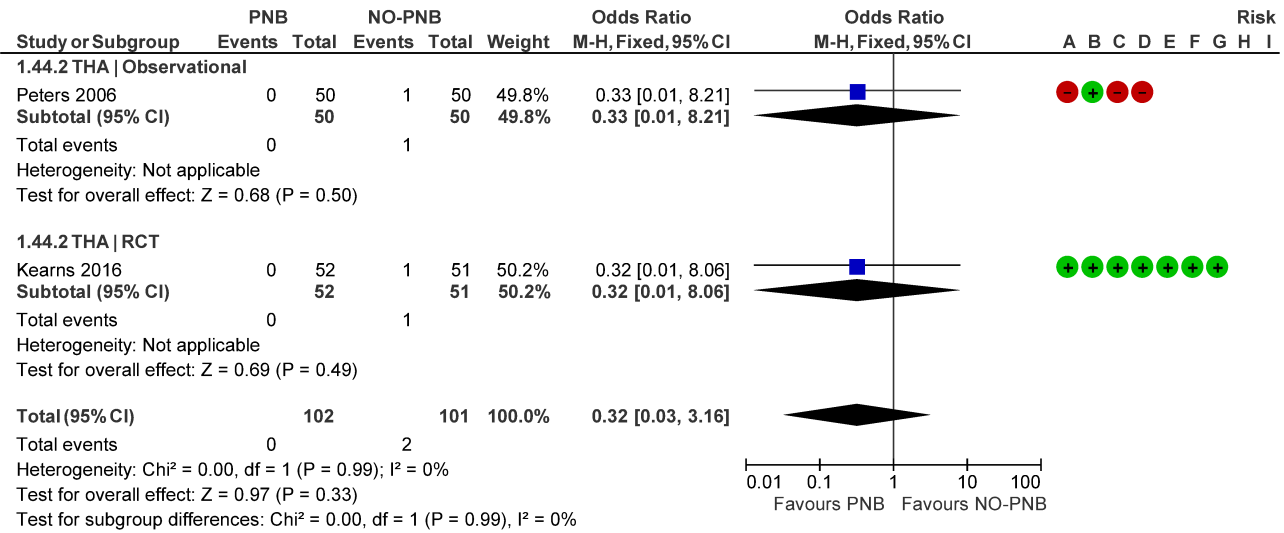

Risk of bias legend

- (A) Random sequence generation (selection bias)
- (B) Allocation concealment (selection bias)
- (C) Blinding of participants and personnel (performance bias)
- (D) Blinding of outcome assessment (detection bias)
- (E) Incomplete outcome data (attrition bias)
- (F) Selective reporting (reporting bias)
- (G) Other bias
- (H) Observational Study: Failure to develop and apply appropriate eligibility criteria
- (I) Observational Study: Flawed measurement of exposure or outcome
- (J) Observational Study: Incomplete follow-up
- (K) Observational Study: Failure to adequately control for confounding
- (L) RCT: Selective outcome reporting
- (M) RCT: Sequence Generation
- (N) RCT: Other sources of bias
- (O) RCT: Blinding of outcome assessors
- (P) RCT: Blinding of participants and personnel
- (Q) RCT: Allocation concealment
- (R) RCT: Incomplete outcome data



PNB versus no PNB for THA/TKA

23-Feb-2021

1.45 Sepsis | TKA

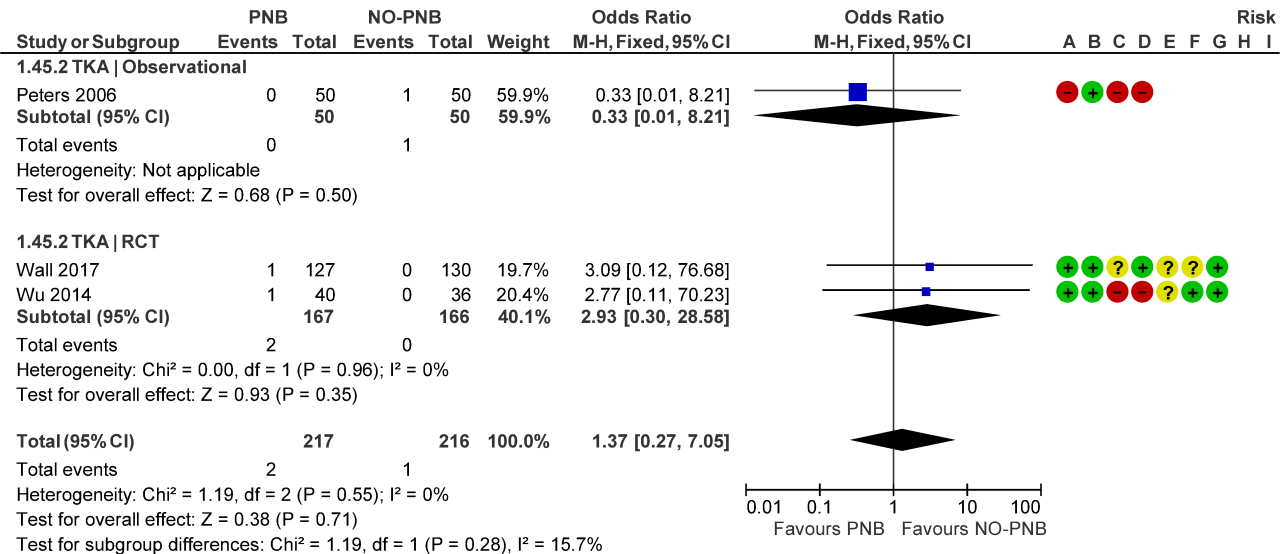

Risk of bias legend

- (A) Random sequence generation (selection bias)
- (B) Allocation concealment (selection bias)
- (C) Blinding of participants and personnel (performance bias)
- (D) Blinding of outcome assessment (detection bias)
- (E) Incomplete outcome data (attrition bias)
- (F) Selective reporting (reporting bias)
- (G) Other bias
- (H) Observational Study: Failure to develop and apply appropriate eligibility criteria
- (I) Observational Study: Flawed measurement of exposure or outcome
- (J) Observational Study: Incomplete follow-up
- (K) Observational Study: Failure to adequately control for confounding
- (L) RCT: Selective outcome reporting
- (M) RCT: Sequence Generation
- (N) RCT: Other sources of bias
- (O) RCT: Blinding of outcome assessors
- (P) RCT: Blinding of participants and personnel
- (Q) RCT: Allocation concealment
- (R) RCT: Incomplete outcome data

PNB versus no PNB for THA/TKA

23-Feb-2021

1.46 Sepsis | GA/NA (THA/TKA)

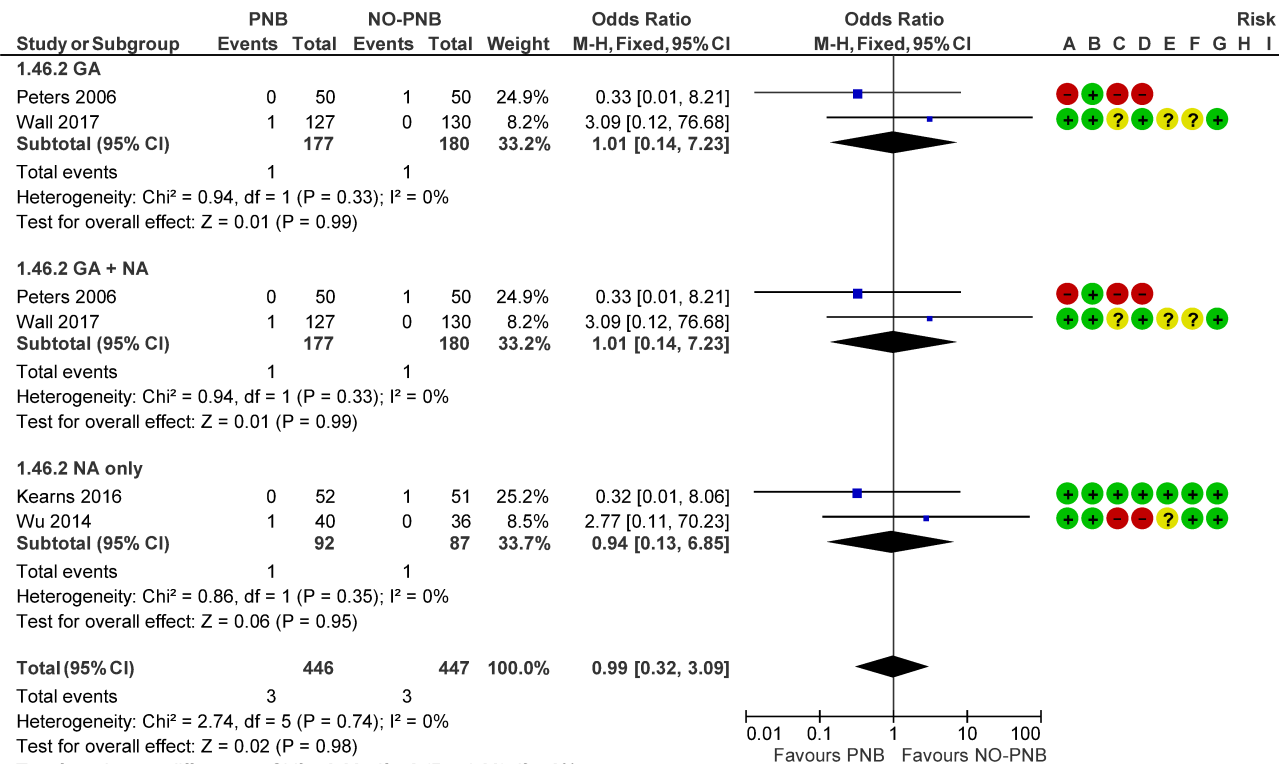

Risk of bias legend

- (A) Random sequence generation (selection bias)
- (B) Allocation concealment (selection bias)
- (C) Blinding of participants and personnel (performance bias)
- (D) Blinding of outcome assessment (detection bias)
- (E) Incomplete outcome data (attrition bias)
- (F) Selective reporting (reporting bias)
- (G) Other bias
- (H) Observational Study: Failure to develop and apply appropriate eligibility criteria
- (I) Observational Study: Flawed measurement of exposure or outcome
- (J) Observational Study: Incomplete follow-up
- (K) Observational Study: Failure to adequately control for confounding
- (L) RCT: Selective outcome reporting
- (M) RCT: Sequence Generation
- (N) RCT: Other sources of bias
- (O) RCT: Blinding of outcome assessors
- (P) RCT: Blinding of participants and personnel
- (Q) RCT: Allocation concealment
- (R) RCT: Incomplete outcome data

PNB versus no PNB for THA/TKA

23-Feb-2021

1.47 Sepsis | Total

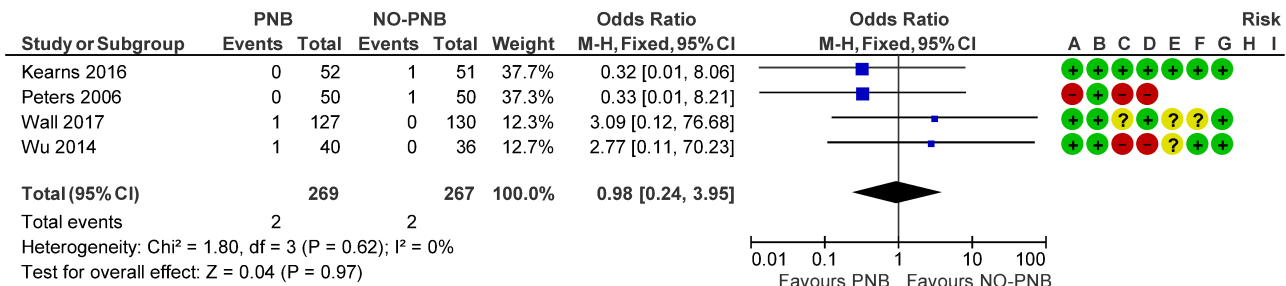

Risk of bias legend

- (A) Random sequence generation (selection bias)
- (B) Allocation concealment (selection bias)
- (C) Blinding of participants and personnel (performance bias)
- (D) Blinding of outcome assessment (detection bias)
- (E) Incomplete outcome data (attrition bias)
- (F) Selective reporting (reporting bias)
- (G) Other bias
- (H) Observational Study: Failure to develop and apply appropriate eligibility criteria
- (I) Observational Study: Flawed measurement of exposure or outcome
- (J) Observational Study: Incomplete follow-up
- (K) Observational Study: Failure to adequately control for confounding
- (L) RCT: Selective outcome reporting
- (M) RCT: Sequence Generation
- (N) RCT: Other sources of bias
- (O) RCT: Blinding of outcome assessors
- (P) RCT: Blinding of participants and personnel
- (Q) RCT: Allocation concealment
- (R) RCT: Incomplete outcome data

PNB versus no PNB for THA/TKA

23-Feb-2021

1.48 Thromboembolism (composite) | THA

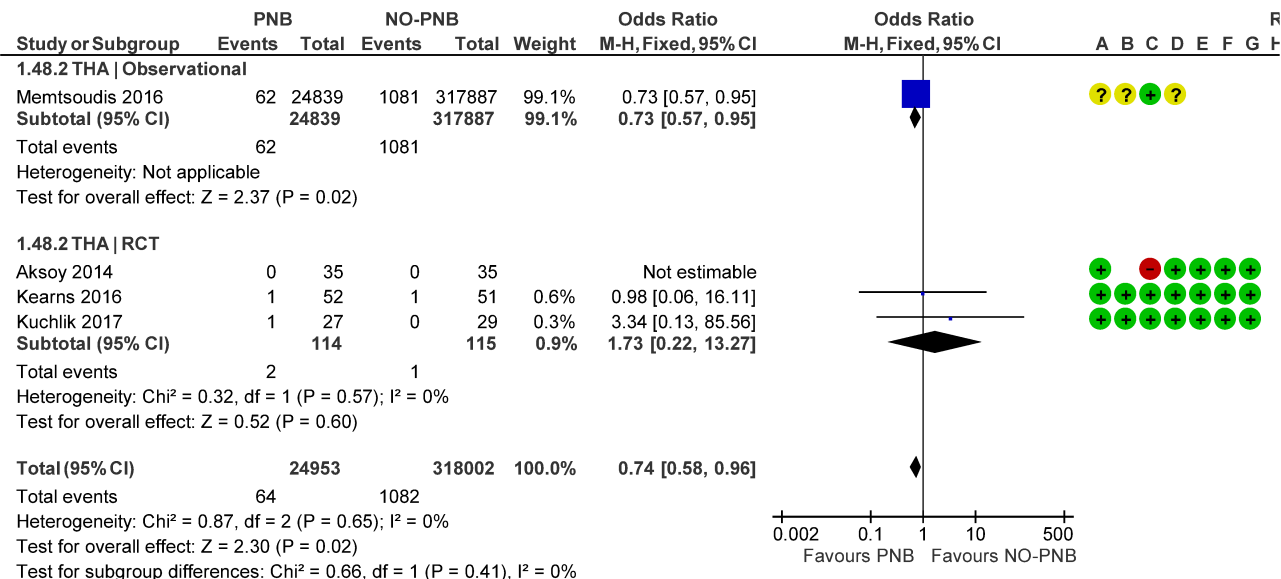

Risk of bias legend

- (A) Random sequence generation (selection bias)
- (B) Allocation concealment (selection bias)
- (C) Blinding of participants and personnel (performance bias)
- (D) Blinding of outcome assessment (detection bias)
- (E) Incomplete outcome data (attrition bias)
- (F) Selective reporting (reporting bias)
- (G) Other bias
- (H) Observational Study: Failure to develop and apply appropriate eligibility criteria
- (I) Observational Study: Flawed measurement of exposure or outcome
- (J) Observational Study: Incomplete follow-up
- (K) Observational Study: Failure to adequately control for confounding
- (L) RCT: Selective outcome reporting
- (M) RCT: Sequence Generation
- (N) RCT: Other sources of bias
- (O) RCT: Blinding of outcome assessors
- (P) RCT: Blinding of participants and personnel
- (Q) RCT: Allocation concealment
- (R) RCT: Incomplete outcome data



**PNB versus no PNB for THA/TKA**

23-Feb-2021

(W) RCT: Allocation concealment  
(R) RCT: Incomplete outcome data

PNB versus no PNB for THA/TKA

23-Feb-2021

1.50 Thromboembolism (composite) | GA/NA (THA/TKA)

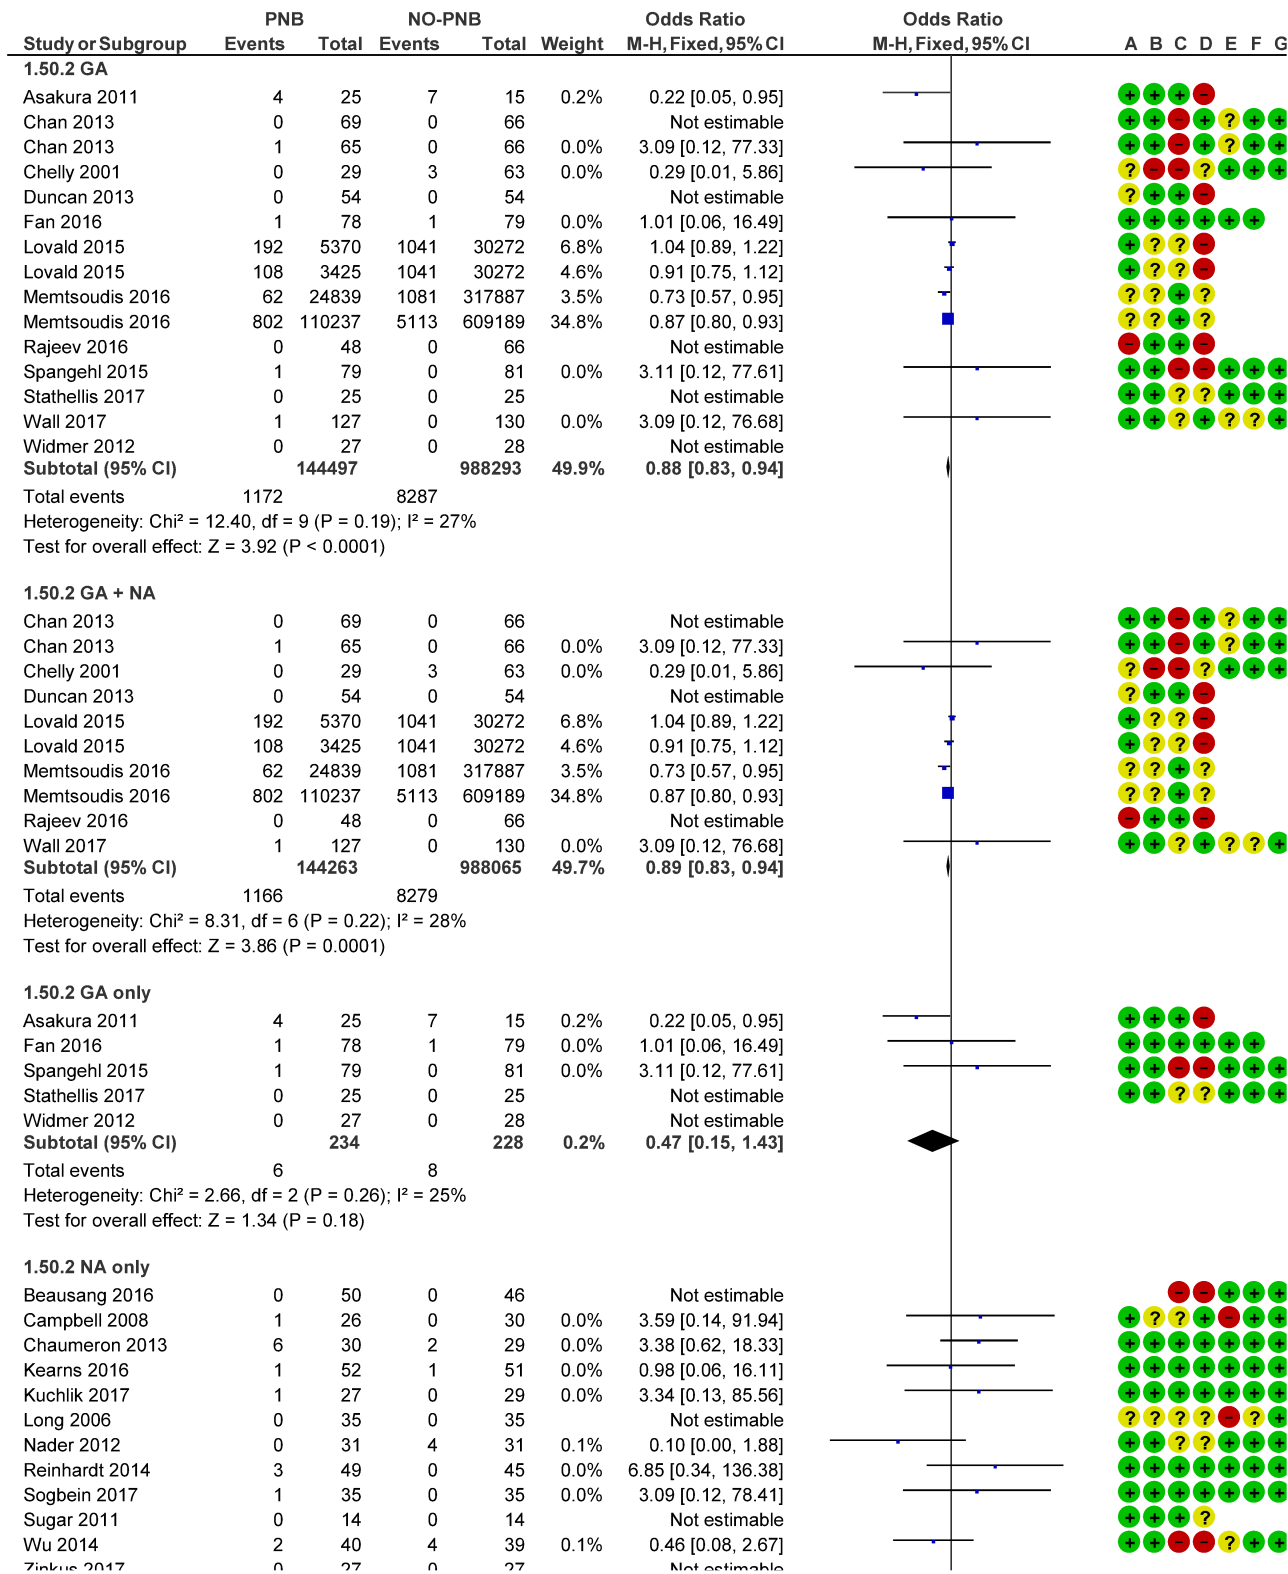

## PNB versus no PNB for THA/TKA

23-Feb-2021

| Subtotal (95% CI) | n   | N   | OR   | 95% CI            |
|-------------------|-----|-----|------|-------------------|
| Subtotal (95% CI) | 416 | 411 | 0.3% | 1.30 [0.63, 2.69] |

Total events 15 11  
 Heterogeneity:  $\text{Chi}^2 = 7.70$ ,  $\text{df} = 7$  ( $P = 0.36$ );  $I^2 = 9\%$   
 Test for overall effect:  $Z = 0.70$  ( $P = 0.48$ )

|                |        |         |        |                   |
|----------------|--------|---------|--------|-------------------|
| Total (95% CI) | 289410 | 1976997 | 100.0% | 0.88 [0.85, 0.92] |
|----------------|--------|---------|--------|-------------------|

Total events 2359 16585  
 Heterogeneity:  $\text{Chi}^2 = 33.59$ ,  $\text{df} = 27$  ( $P = 0.18$ );  $I^2 = 20\%$   
 Test for overall effect:  $Z = 5.50$  ( $P < 0.00001$ )  
 Test for subgroup differences:  $\text{Chi}^2 = 2.33$ ,  $\text{df} = 3$  ( $P = 0.51$ ),  $I^2 = 0\%$

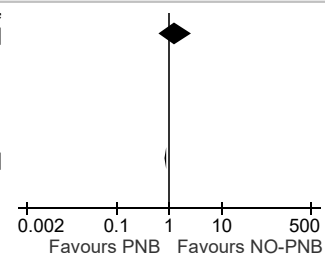Risk of bias legend

- (A) Random sequence generation (selection bias)
- (B) Allocation concealment (selection bias)
- (C) Blinding of participants and personnel (performance bias)
- (D) Blinding of outcome assessment (detection bias)
- (E) Incomplete outcome data (attrition bias)
- (F) Selective reporting (reporting bias)
- (G) Other bias
- (H) Observational Study: Failure to develop and apply appropriate eligibility criteria
- (I) Observational Study: Flawed measurement of exposure or outcome
- (J) Observational Study: Incomplete follow-up
- (K) Observational Study: Failure to adequately control for confounding
- (L) RCT: Selective outcome reporting
- (M) RCT: Sequence Generation
- (N) RCT: Other sources of bias
- (O) RCT: Blinding of outcome assessors
- (P) RCT: Blinding of participants and personnel
- (Q) RCT: Allocation concealment
- (R) RCT: Incomplete outcome data



PNB versus no PNB for THA/TKA

23-Feb-2021

1.51 Thromboembolism (composite) | Total

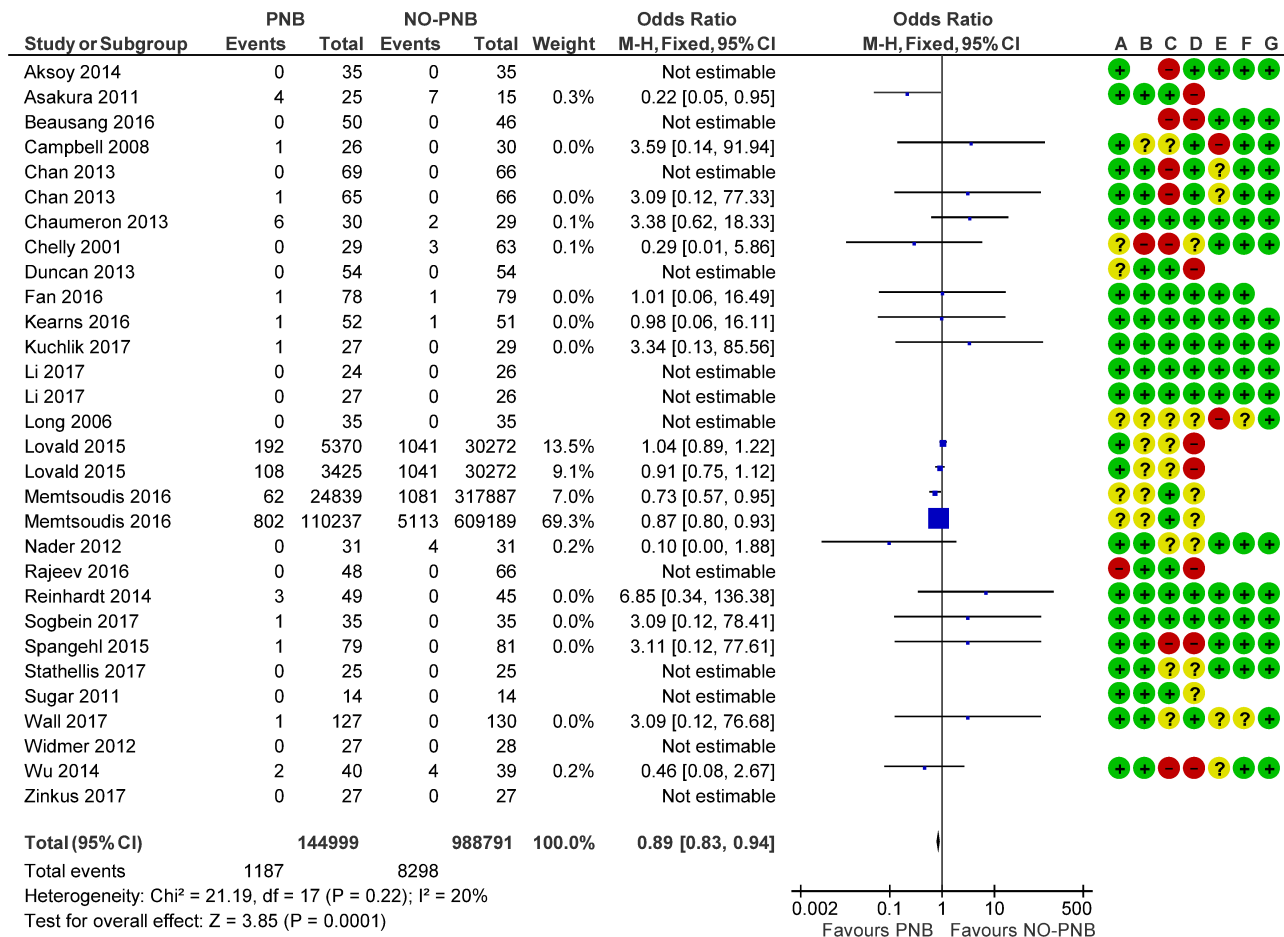

Risk of bias legend

- (A) Random sequence generation (selection bias)
- (B) Allocation concealment (selection bias)
- (C) Blinding of participants and personnel (performance bias)
- (D) Blinding of outcome assessment (detection bias)
- (E) Incomplete outcome data (attrition bias)
- (F) Selective reporting (reporting bias)
- (G) Other bias
- (H) Observational Study: Failure to develop and apply appropriate eligibility criteria
- (I) Observational Study: Flawed measurement of exposure or outcome
- (J) Observational Study: Incomplete follow-up
- (K) Observational Study: Failure to adequately control for confounding
- (L) RCT: Selective outcome reporting
- (M) RCT: Sequence Generation
- (N) RCT: Other sources of bias
- (O) RCT: Blinding of outcome assessors
- (P) RCT: Blinding of participants and personnel
- (Q) RCT: Allocation concealment
- (R) RCT: Incomplete outcome data

PNB versus no PNB for THA/TKA

23-Feb-2021

1.52 Hematoma | THA

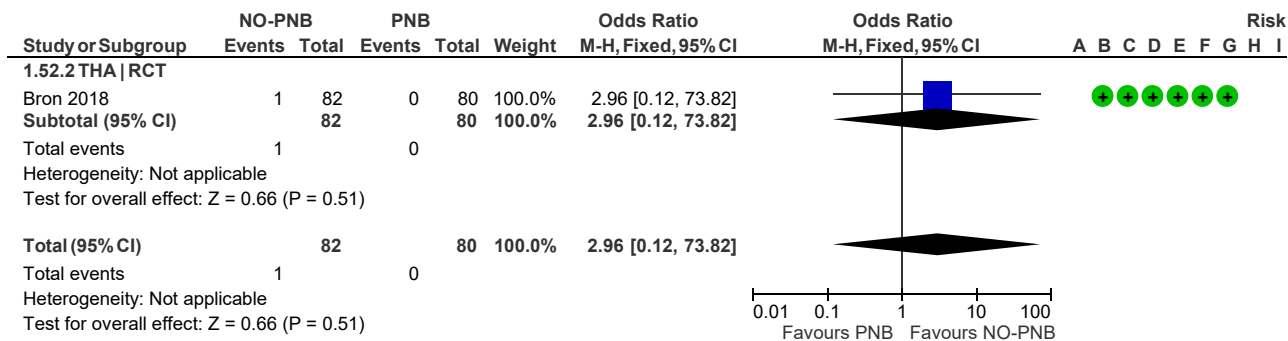

Risk of bias legend

- (A) Random sequence generation (selection bias)
- (B) Allocation concealment (selection bias)
- (C) Blinding of participants and personnel (performance bias)
- (D) Blinding of outcome assessment (detection bias)
- (E) Incomplete outcome data (attrition bias)
- (F) Selective reporting (reporting bias)
- (G) Other bias
- (H) Observational Study: Failure to develop and apply appropriate eligibility criteria
- (I) Observational Study: Flawed measurement of exposure or outcome
- (J) Observational Study: Incomplete follow-up
- (K) Observational Study: Failure to adequately control for confounding
- (L) RCT: Selective outcome reporting
- (M) RCT: Sequence Generation
- (N) RCT: Other sources of bias
- (O) RCT: Blinding of outcome assessors
- (P) RCT: Blinding of participants and personnel
- (Q) RCT: Allocation concealment
- (R) RCT: Incomplete outcome data



PNB versus no PNB for THA/TKA

23-Feb-2021

1.54 Hematoma | GA/NA (THA/TKA)

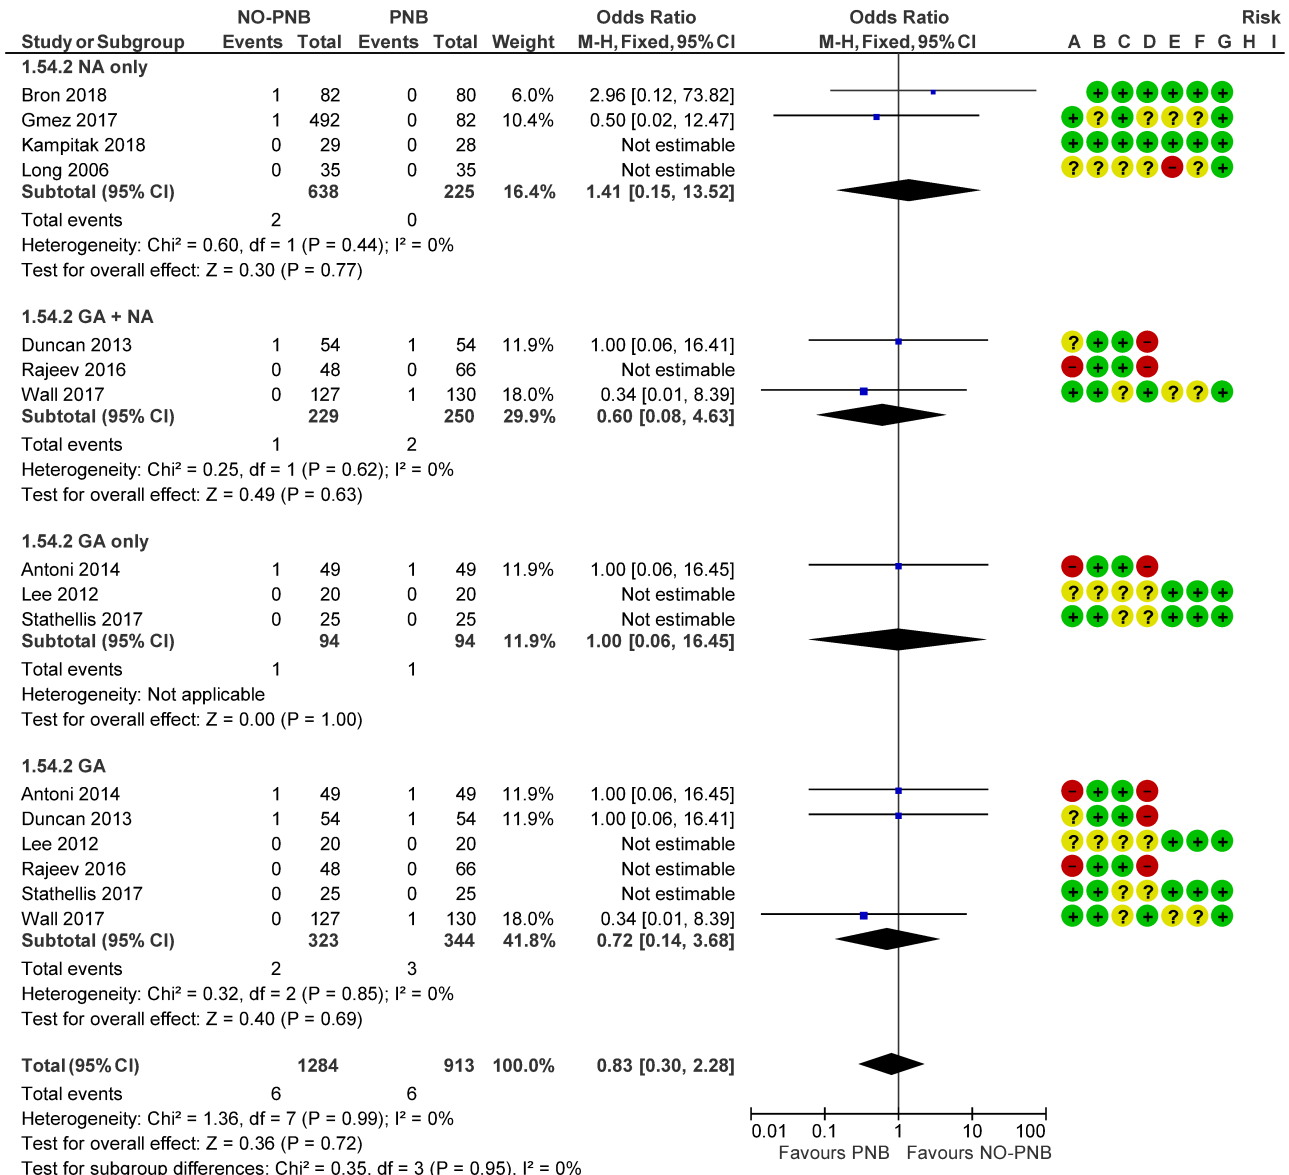

Risk of bias legend

- (A) Random sequence generation (selection bias)
- (B) Allocation concealment (selection bias)
- (C) Blinding of participants and personnel (performance bias)
- (D) Blinding of outcome assessment (detection bias)
- (E) Incomplete outcome data (attrition bias)
- (F) Selective reporting (reporting bias)
- (G) Other bias
- (H) Observational Study: Failure to develop and apply appropriate eligibility criteria
- (I) Observational Study: Flawed measurement of exposure or outcome
- (J) Observational Study: Incomplete follow-up
- (K) Observational Study: Failure to adequately control for confounding
- (L) RCT: Selective outcome reporting
- (M) RCT: Sequence Generation
- (N) RCT: Other sources of bias
- (O) RCT: Blinding of outcome assessment

**PNB versus no PNB for THA/TKA**

23-Feb-2021

- (U) RCT: Blinding of outcome assessors
- (P) RCT: Blinding of participants and personnel
- (Q) RCT: Allocation concealment
- (R) RCT: Incomplete outcome data

PNB versus no PNB for THA/TKA

23-Feb-2021

1.55 Hematoma | TKA

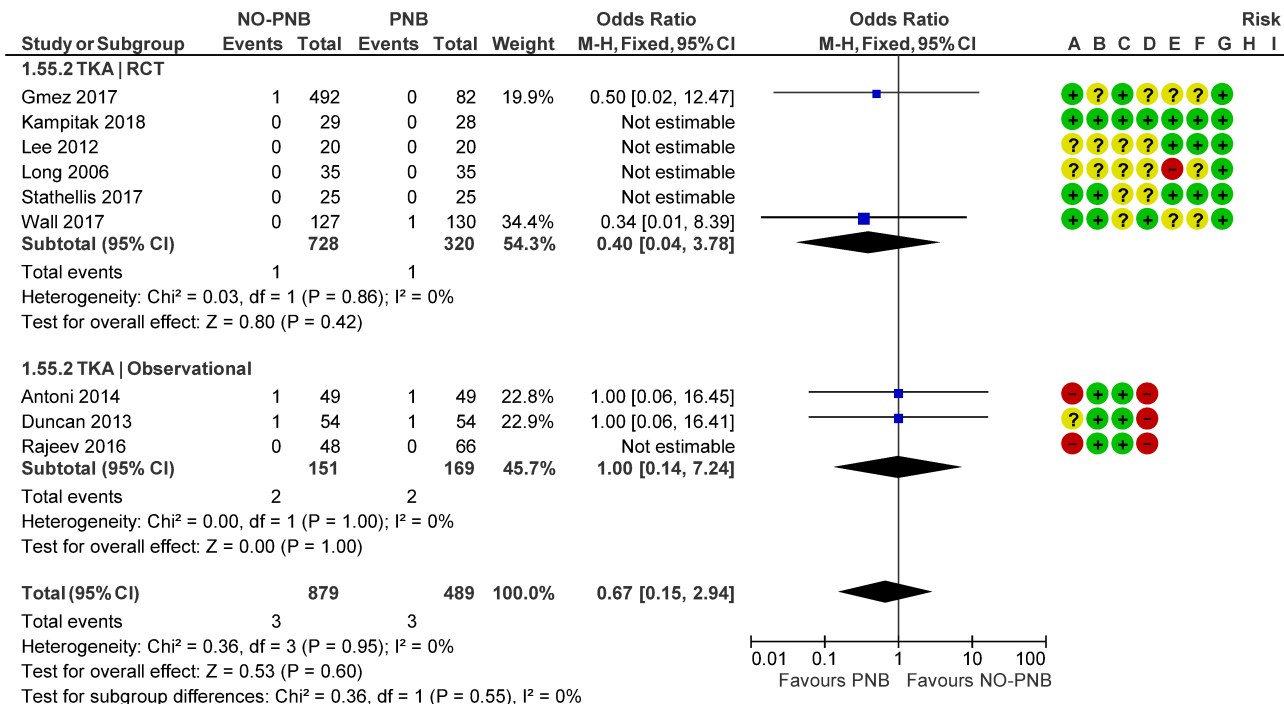

Risk of bias legend

- (A) Random sequence generation (selection bias)
- (B) Allocation concealment (selection bias)
- (C) Blinding of participants and personnel (performance bias)
- (D) Blinding of outcome assessment (detection bias)
- (E) Incomplete outcome data (attrition bias)
- (F) Selective reporting (reporting bias)
- (G) Other bias
- (H) Observational Study: Failure to develop and apply appropriate eligibility criteria
- (I) Observational Study: Flawed measurement of exposure or outcome
- (J) Observational Study: Incomplete follow-up
- (K) Observational Study: Failure to adequately control for confounding
- (L) RCT: Selective outcome reporting
- (M) RCT: Sequence Generation
- (N) RCT: Other sources of bias
- (O) RCT: Blinding of outcome assessors
- (P) RCT: Blinding of participants and personnel
- (Q) RCT: Allocation concealment
- (R) RCT: Incomplete outcome data

PNB versus no PNB for THA/TKA

23-Feb-2021

1.56 Surgical site infection | Total

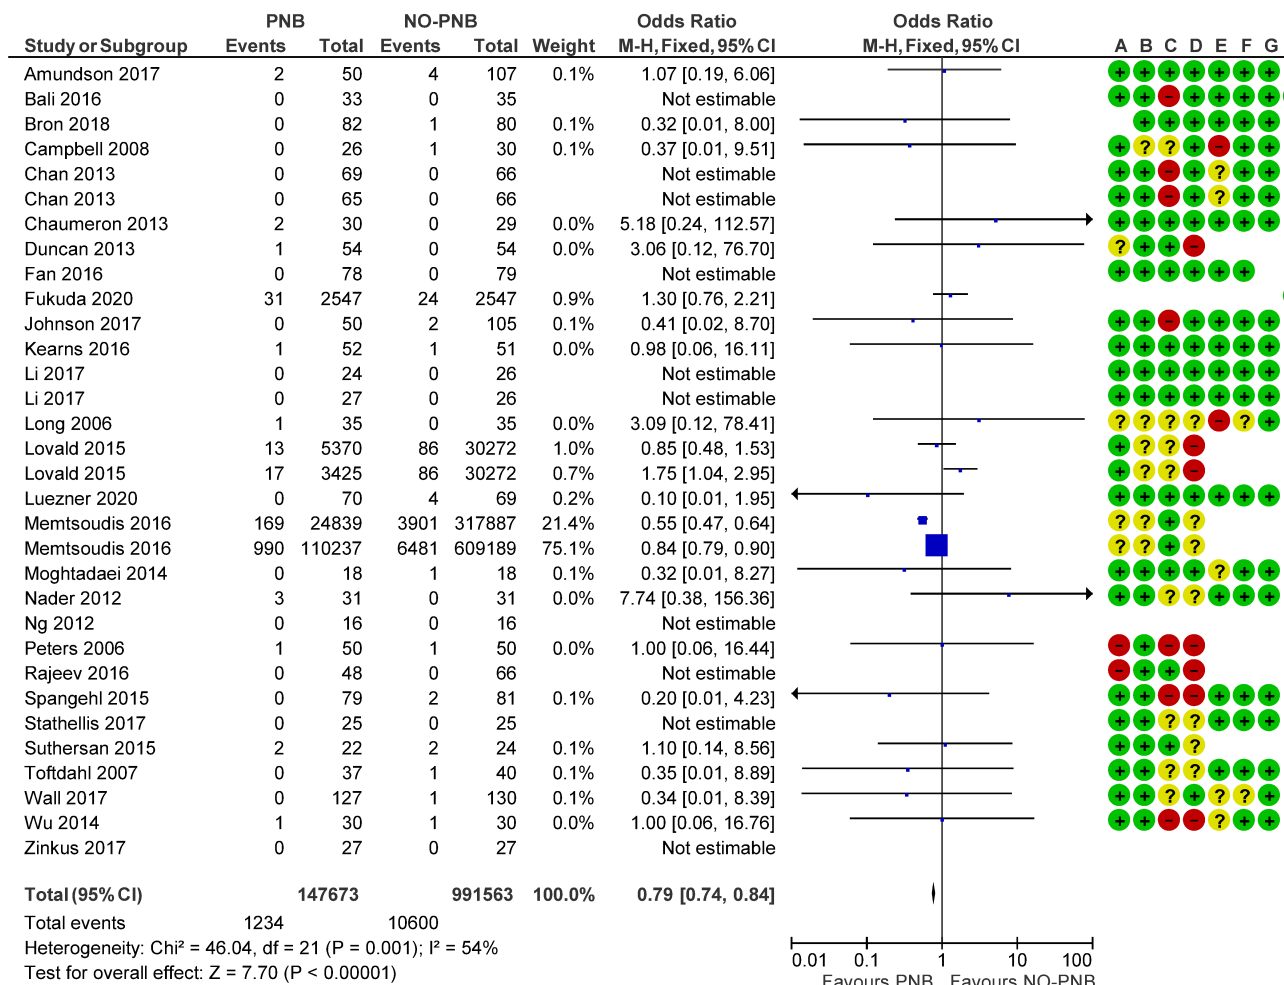

Risk of bias legend

- (A) Random sequence generation (selection bias)
- (B) Allocation concealment (selection bias)
- (C) Blinding of participants and personnel (performance bias)
- (D) Blinding of outcome assessment (detection bias)
- (E) Incomplete outcome data (attrition bias)
- (F) Selective reporting (reporting bias)
- (G) Other bias
- (H) Observational Study: Failure to develop and apply appropriate eligibility criteria
- (I) Observational Study: Flawed measurement of exposure or outcome
- (J) Observational Study: Incomplete follow-up
- (K) Observational Study: Failure to adequately control for confounding
- (L) RCT: Selective outcome reporting
- (M) RCT: Sequence Generation
- (N) RCT: Other sources of bias
- (O) RCT: Blinding of outcome assessors
- (P) RCT: Blinding of participants and personnel
- (Q) RCT: Allocation concealment
- (R) RCT: Incomplete outcome data

PNB versus no PNB for THA/TKA

23-Feb-2021

1.57 Surgical site infection | TKA

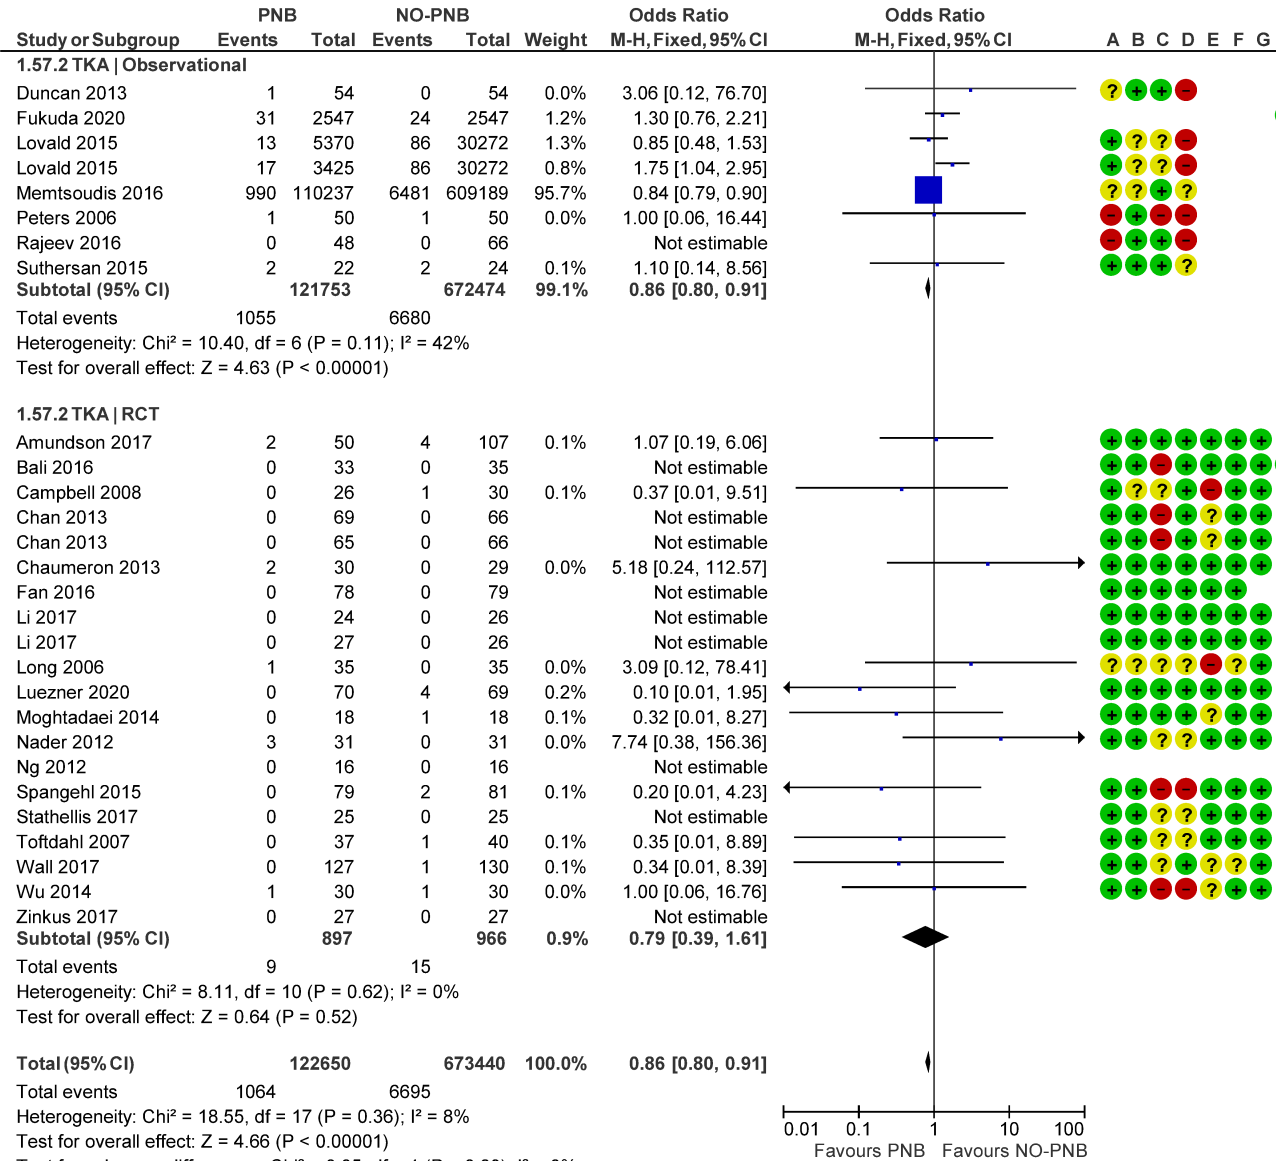

Risk of bias legend

- (A) Random sequence generation (selection bias)
- (B) Allocation concealment (selection bias)
- (C) Blinding of participants and personnel (performance bias)
- (D) Blinding of outcome assessment (detection bias)
- (E) Incomplete outcome data (attrition bias)
- (F) Selective reporting (reporting bias)
- (G) Other bias
- (H) Observational Study: Failure to develop and apply appropriate eligibility criteria
- (I) Observational Study: Flawed measurement of exposure or outcome
- (J) Observational Study: Incomplete follow-up
- (K) Observational Study: Failure to adequately control for confounding
- (L) RCT: Selective outcome reporting
- (M) RCT: Sequence Generation
- (N) RCT: Other sources of bias
- (O) RCT: Blinding of outcome assessment



**PNB versus no PNB for THA/TKA**

23-Feb-2021

- (U) RCT: Blinding of outcome assessors
- (P) RCT: Blinding of participants and personnel
- (Q) RCT: Allocation concealment
- (R) RCT: Incomplete outcome data

PNB versus no PNB for THA/TKA

23-Feb-2021

1.58 Surgical site infection | GA/NA (THA/TKA)

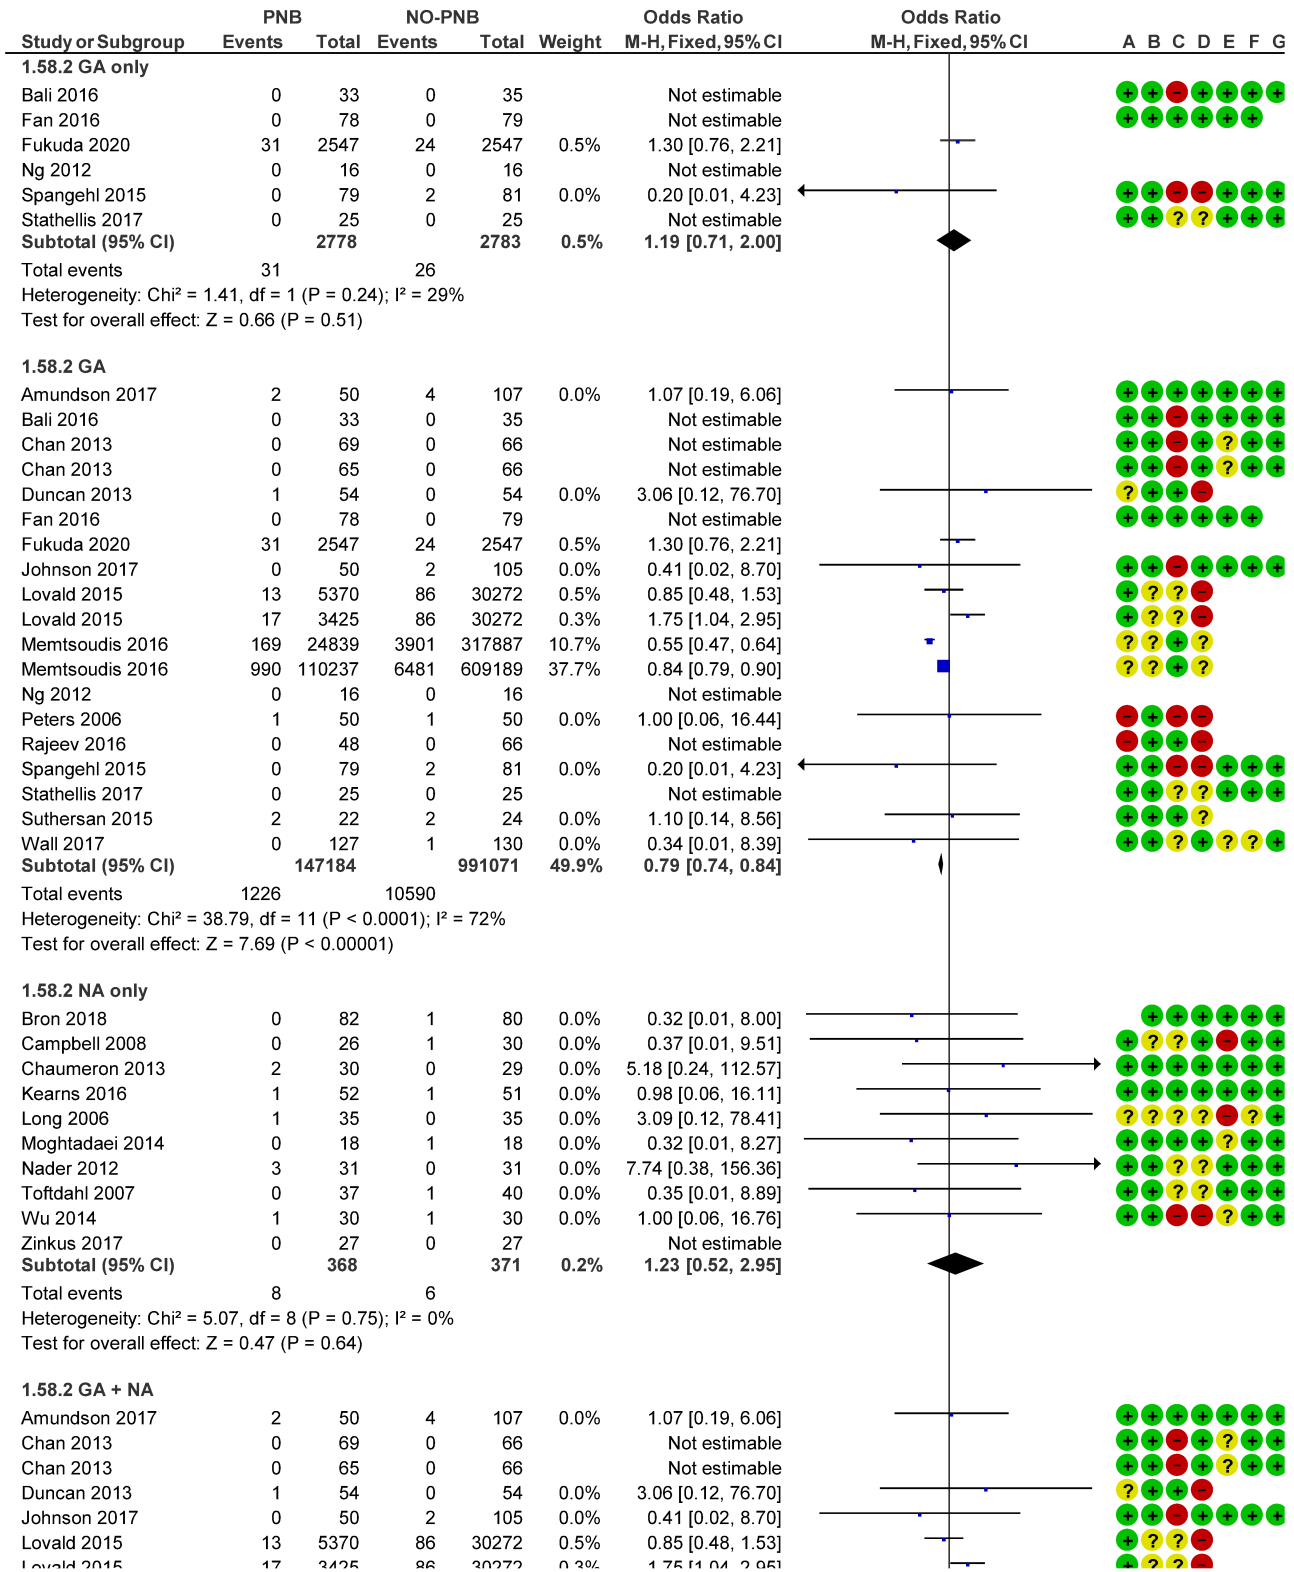

PNB versus no PNB for THA/TKA

23-Feb-2021

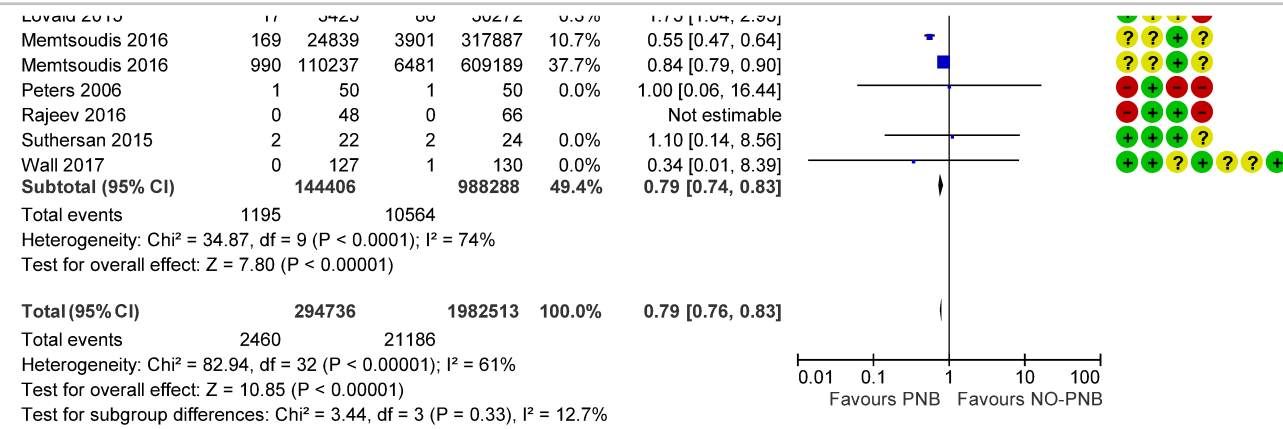

Risk of bias legend

- (A) Random sequence generation (selection bias)
- (B) Allocation concealment (selection bias)
- (C) Blinding of participants and personnel (performance bias)
- (D) Blinding of outcome assessment (detection bias)
- (E) Incomplete outcome data (attrition bias)
- (F) Selective reporting (reporting bias)
- (G) Other bias
- (H) Observational Study: Failure to develop and apply appropriate eligibility criteria
- (I) Observational Study: Flawed measurement of exposure or outcome
- (J) Observational Study: Incomplete follow-up
- (K) Observational Study: Failure to adequately control for confounding
- (L) RCT: Selective outcome reporting
- (M) RCT: Sequence Generation
- (N) RCT: Other sources of bias
- (O) RCT: Blinding of outcome assessors
- (P) RCT: Blinding of participants and personnel
- (Q) RCT: Allocation concealment
- (R) RCT: Incomplete outcome data

PNB versus no PNB for THA/TKA

23-Feb-2021

1.59 Surgical site infection | THA

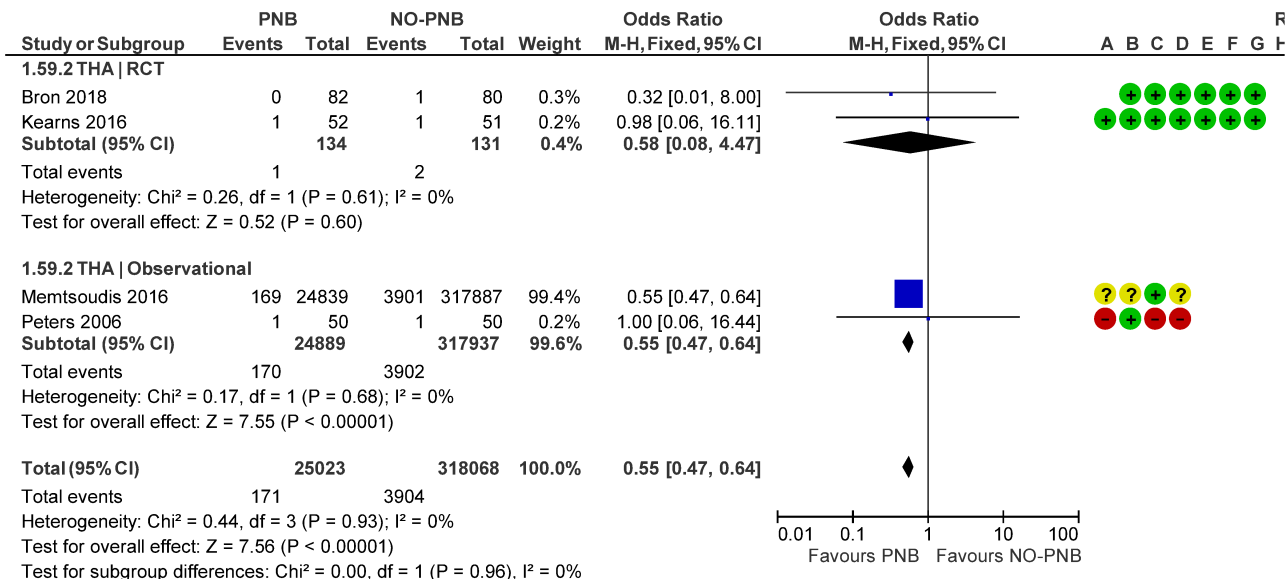

Risk of bias legend

- (A) Random sequence generation (selection bias)
- (B) Allocation concealment (selection bias)
- (C) Blinding of participants and personnel (performance bias)
- (D) Blinding of outcome assessment (detection bias)
- (E) Incomplete outcome data (attrition bias)
- (F) Selective reporting (reporting bias)
- (G) Other bias
- (H) Observational Study: Failure to develop and apply appropriate eligibility criteria
- (I) Observational Study: Flawed measurement of exposure or outcome
- (J) Observational Study: Incomplete follow-up
- (K) Observational Study: Failure to adequately control for confounding
- (L) RCT: Selective outcome reporting
- (M) RCT: Sequence Generation
- (N) RCT: Other sources of bias
- (O) RCT: Blinding of outcome assessors
- (P) RCT: Blinding of participants and personnel
- (Q) RCT: Allocation concealment
- (R) RCT: Incomplete outcome data

PNB versus no PNB for THA/TKA

23-Feb-2021

1.60 Infection (composite) | Total

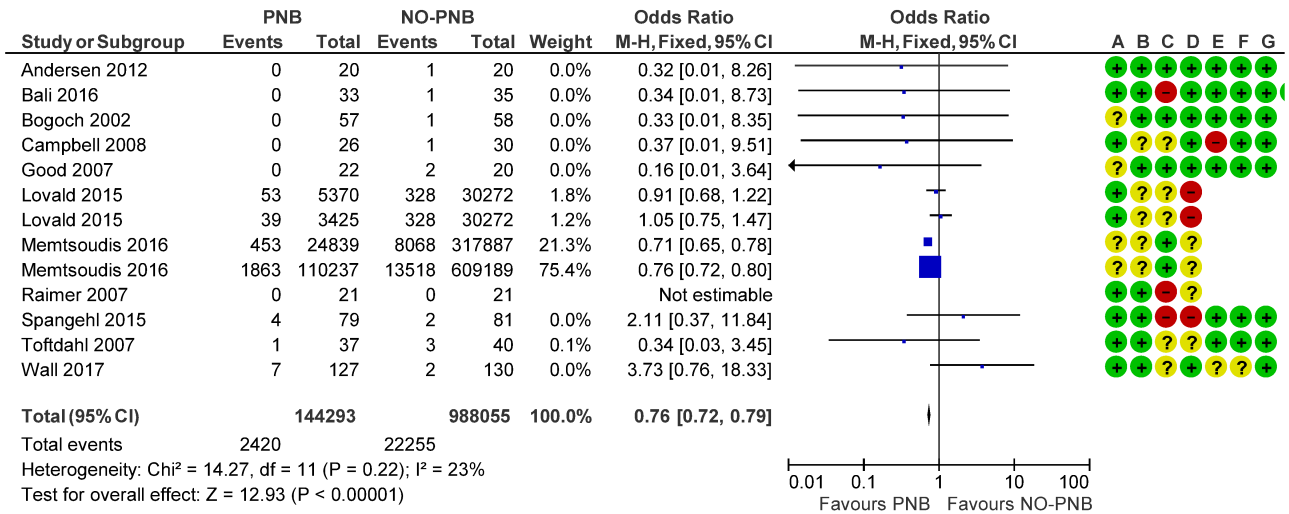

Risk of bias legend

- (A) Random sequence generation (selection bias)
- (B) Allocation concealment (selection bias)
- (C) Blinding of participants and personnel (performance bias)
- (D) Blinding of outcome assessment (detection bias)
- (E) Incomplete outcome data (attrition bias)
- (F) Selective reporting (reporting bias)
- (G) Other bias
- (H) Observational Study: Failure to develop and apply appropriate eligibility criteria
- (I) Observational Study: Flawed measurement of exposure or outcome
- (J) Observational Study: Incomplete follow-up
- (K) Observational Study: Failure to adequately control for confounding
- (L) RCT: Selective outcome reporting
- (M) RCT: Sequence Generation
- (N) RCT: Other sources of bias
- (O) RCT: Blinding of outcome assessors
- (P) RCT: Blinding of participants and personnel
- (Q) RCT: Allocation concealment
- (R) RCT: Incomplete outcome data

PNB versus no PNB for THA/TKA

23-Feb-2021

1.61 Infection (composite) | GA/NA (THA/TKA)

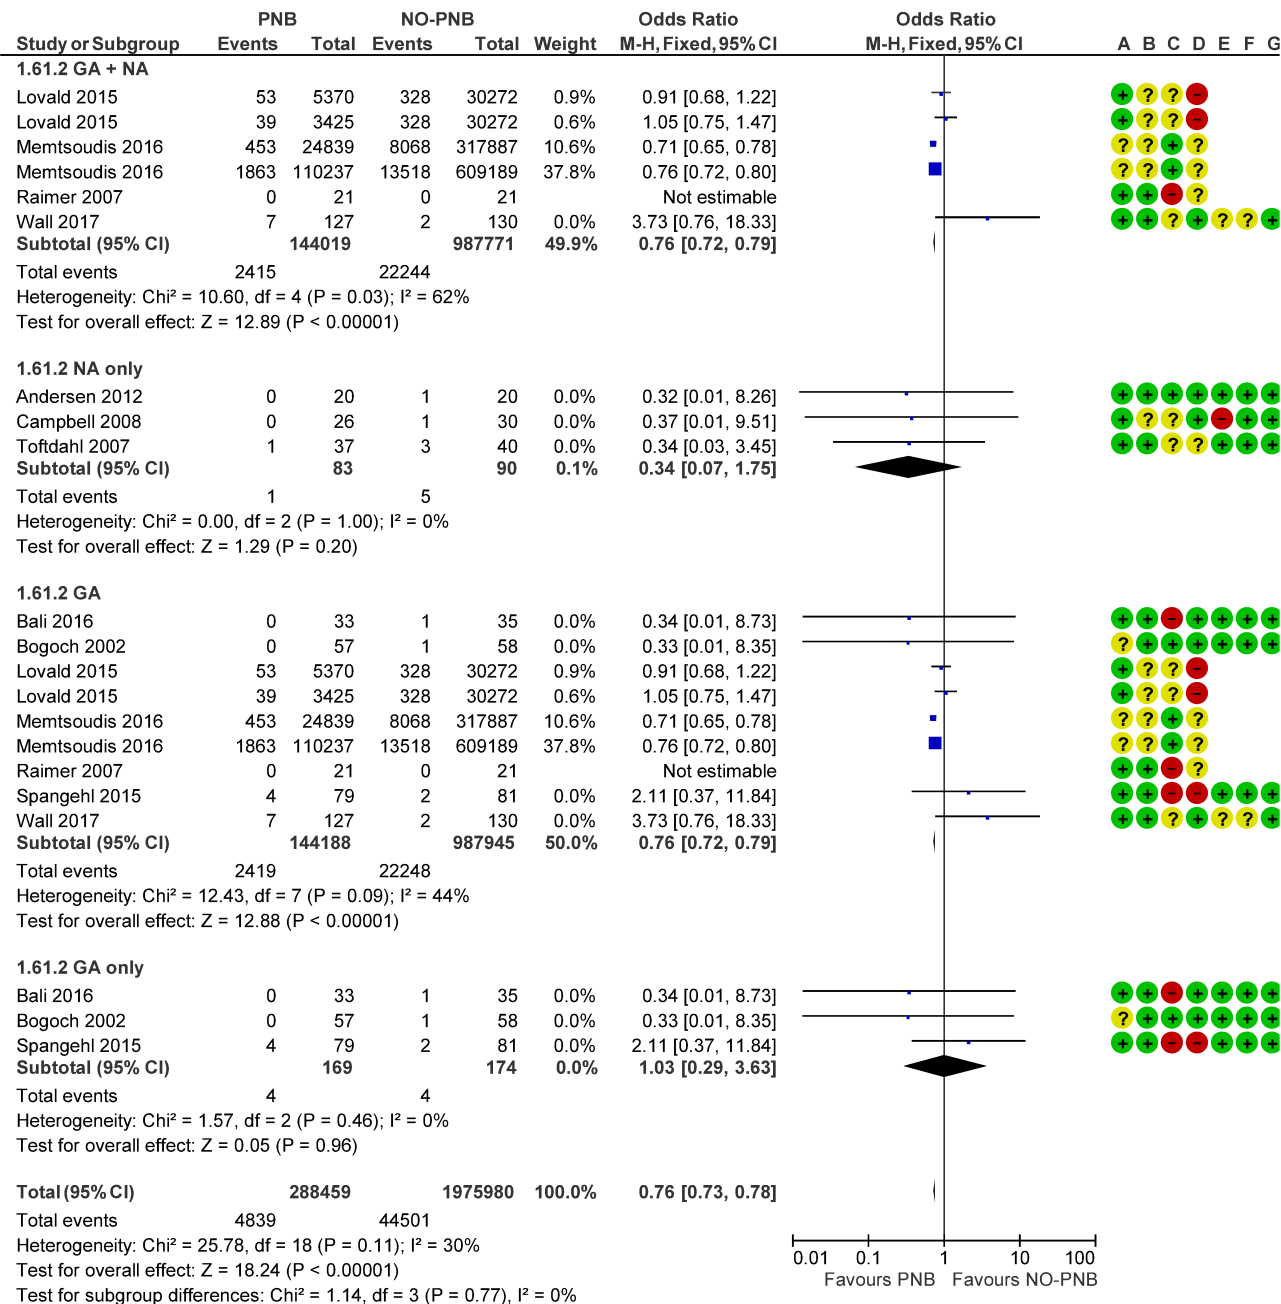

Risk of bias legend

- (A) Random sequence generation (selection bias)
- (B) Allocation concealment (selection bias)
- (C) Blinding of participants and personnel (performance bias)
- (D) Blinding of outcome assessment (detection bias)
- (E) Incomplete outcome data (attrition bias)
- (F) Selective reporting (reporting bias)
- (G) Other bias
- (H) Observational Study: Failure to develop and apply appropriate eligibility criteria
- (I) Observational Study: Flawed measurement of exposure or outcome
- (J) Observational Study: Incomplete follow-up

## PNB versus no PNB for THA/TKA

23-Feb-2021

- (J) Observational Study: Incomplete follow-up
- (K) Observational Study: Failure to adequately control for confounding
- (L) RCT: Selective outcome reporting
- (M) RCT: Sequence Generation
- (N) RCT: Other sources of bias
- (O) RCT: Blinding of outcome assessors
- (P) RCT: Blinding of participants and personnel
- (Q) RCT: Allocation concealment
- (R) RCT: Incomplete outcome data

PNB versus no PNB for THA/TKA

23-Feb-2021

1.62 Infection (composite) | TKA

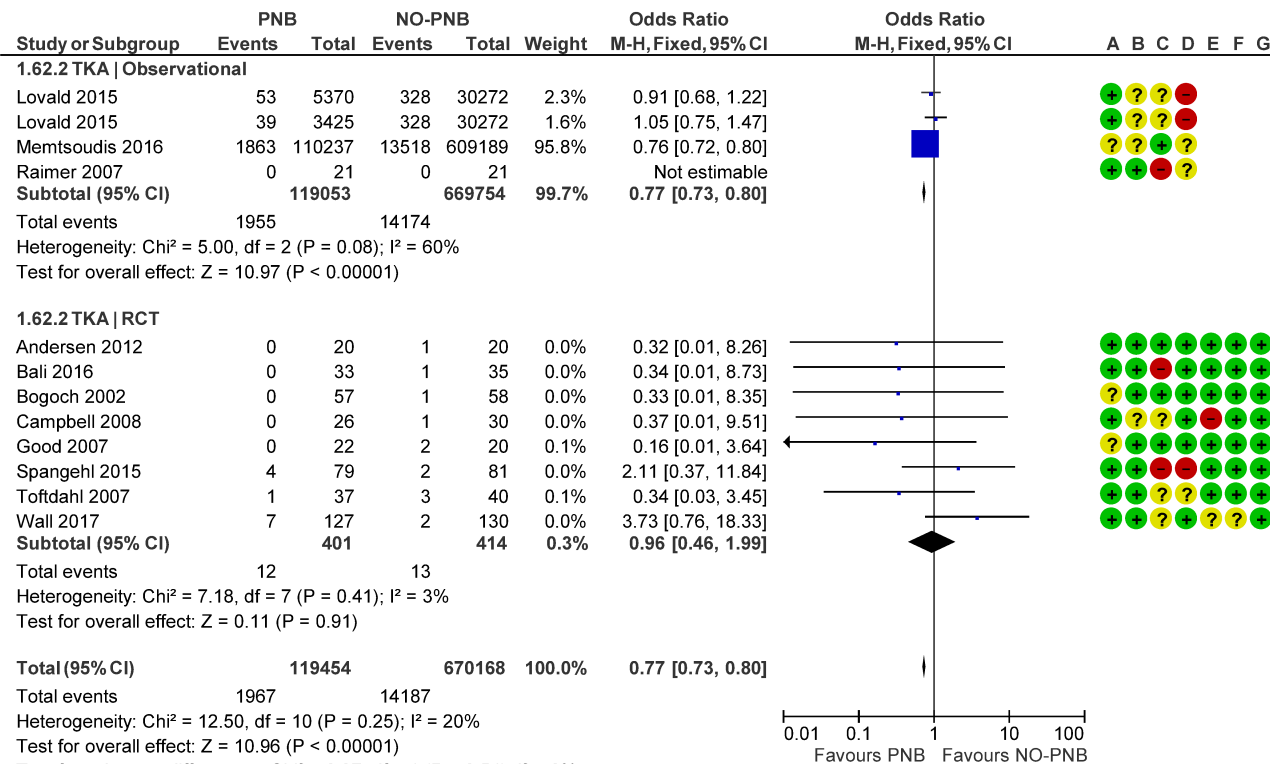

Risk of bias legend

- (A) Random sequence generation (selection bias)
- (B) Allocation concealment (selection bias)
- (C) Blinding of participants and personnel (performance bias)
- (D) Blinding of outcome assessment (detection bias)
- (E) Incomplete outcome data (attrition bias)
- (F) Selective reporting (reporting bias)
- (G) Other bias
- (H) Observational Study: Failure to develop and apply appropriate eligibility criteria
- (I) Observational Study: Flawed measurement of exposure or outcome
- (J) Observational Study: Incomplete follow-up
- (K) Observational Study: Failure to adequately control for confounding
- (L) RCT: Selective outcome reporting
- (M) RCT: Sequence Generation
- (N) RCT: Other sources of bias
- (O) RCT: Blinding of outcome assessors
- (P) RCT: Blinding of participants and personnel
- (Q) RCT: Allocation concealment
- (R) RCT: Incomplete outcome data



PNB versus no PNB for THA/TKA

23-Feb-2021

1.63 Infection (composite) | THA

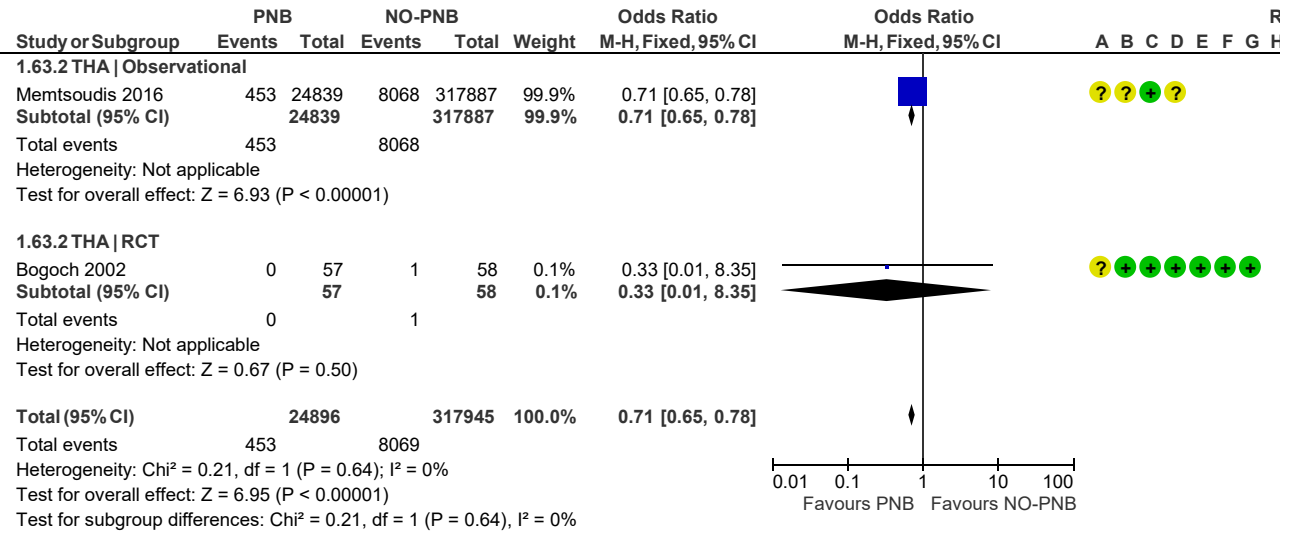

Risk of bias legend

- (A) Random sequence generation (selection bias)
- (B) Allocation concealment (selection bias)
- (C) Blinding of participants and personnel (performance bias)
- (D) Blinding of outcome assessment (detection bias)
- (E) Incomplete outcome data (attrition bias)
- (F) Selective reporting (reporting bias)
- (G) Other bias
- (H) Observational Study: Failure to develop and apply appropriate eligibility criteria
- (I) Observational Study: Flawed measurement of exposure or outcome
- (J) Observational Study: Incomplete follow-up
- (K) Observational Study: Failure to adequately control for confounding
- (L) RCT: Selective outcome reporting
- (M) RCT: Sequence Generation
- (N) RCT: Other sources of bias
- (O) RCT: Blinding of outcome assessors
- (P) RCT: Blinding of participants and personnel
- (Q) RCT: Allocation concealment
- (R) RCT: Incomplete outcome data

## PNB versus no PNB for THA/TKA

23-Feb-2021

## 1.64 Urinary tract infection | Total

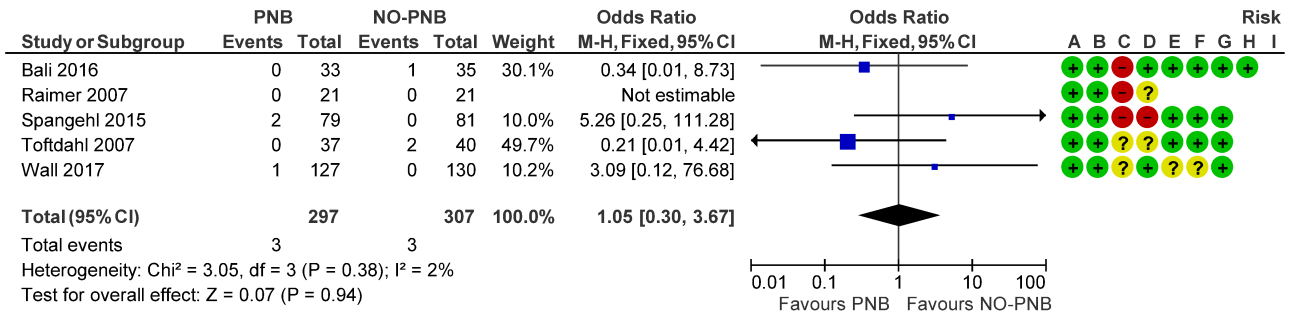Risk of bias legend

- (A) Random sequence generation (selection bias)
- (B) Allocation concealment (selection bias)
- (C) Blinding of participants and personnel (performance bias)
- (D) Blinding of outcome assessment (detection bias)
- (E) Incomplete outcome data (attrition bias)
- (F) Selective reporting (reporting bias)
- (G) Other bias
- (H) Observational Study: Failure to develop and apply appropriate eligibility criteria
- (I) Observational Study: Flawed measurement of exposure or outcome
- (J) Observational Study: Incomplete follow-up
- (K) Observational Study: Failure to adequately control for confounding
- (L) RCT: Selective outcome reporting
- (M) RCT: Sequence Generation
- (N) RCT: Other sources of bias
- (O) RCT: Blinding of outcome assessors
- (P) RCT: Blinding of participants and personnel
- (Q) RCT: Allocation concealment
- (R) RCT: Incomplete outcome data

PNB versus no PNB for THA/TKA

23-Feb-2021

1.65 Urinary tract infection | GA/NA (THA/TKA)

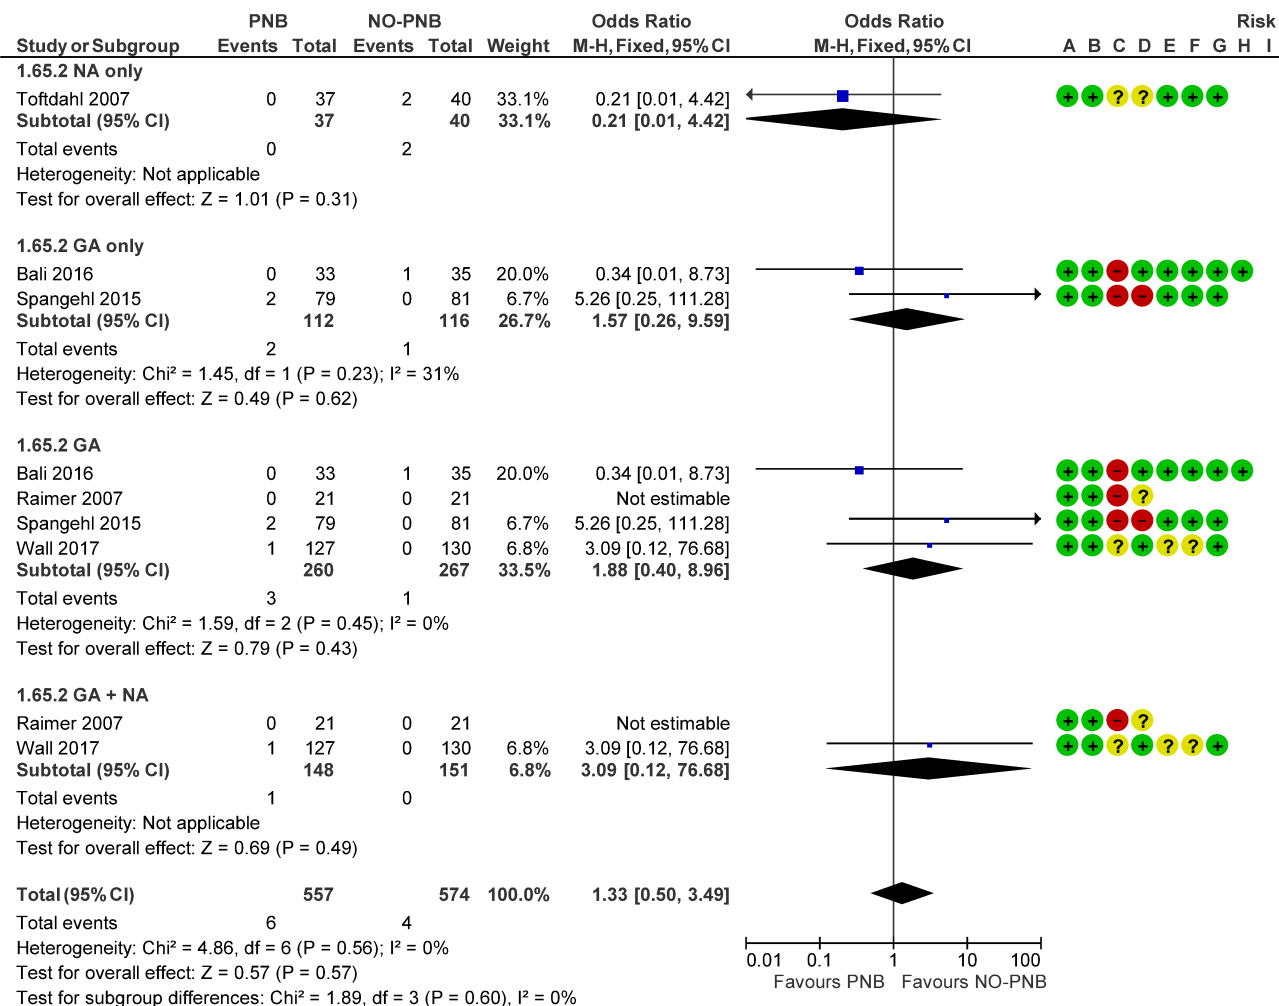

Risk of bias legend

- (A) Random sequence generation (selection bias)
- (B) Allocation concealment (selection bias)
- (C) Blinding of participants and personnel (performance bias)
- (D) Blinding of outcome assessment (detection bias)
- (E) Incomplete outcome data (attrition bias)
- (F) Selective reporting (reporting bias)
- (G) Other bias
- (H) Observational Study: Failure to develop and apply appropriate eligibility criteria
- (I) Observational Study: Flawed measurement of exposure or outcome
- (J) Observational Study: Incomplete follow-up
- (K) Observational Study: Failure to adequately control for confounding
- (L) RCT: Selective outcome reporting
- (M) RCT: Sequence Generation
- (N) RCT: Other sources of bias
- (O) RCT: Blinding of outcome assessors
- (P) RCT: Blinding of participants and personnel
- (Q) RCT: Allocation concealment
- (R) RCT: Incomplete outcome data

PNB versus no PNB for THA/TKA

23-Feb-2021

1.66 Urinary tract infection | TKA

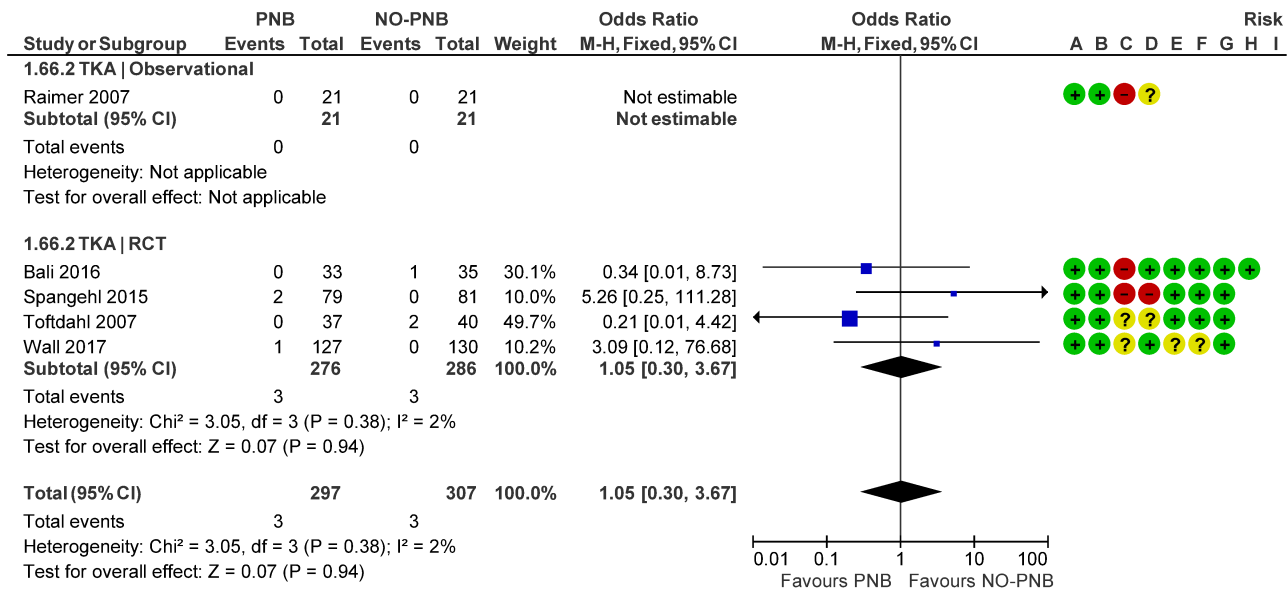

Risk of bias legend

- (A) Random sequence generation (selection bias)
- (B) Allocation concealment (selection bias)
- (C) Blinding of participants and personnel (performance bias)
- (D) Blinding of outcome assessment (detection bias)
- (E) Incomplete outcome data (attrition bias)
- (F) Selective reporting (reporting bias)
- (G) Other bias
- (H) Observational Study: Failure to develop and apply appropriate eligibility criteria
- (I) Observational Study: Flawed measurement of exposure or outcome
- (J) Observational Study: Incomplete follow-up
- (K) Observational Study: Failure to adequately control for confounding
- (L) RCT: Selective outcome reporting
- (M) RCT: Sequence Generation
- (N) RCT: Other sources of bias
- (O) RCT: Blinding of outcome assessors
- (P) RCT: Blinding of participants and personnel
- (Q) RCT: Allocation concealment
- (R) RCT: Incomplete outcome data

## PNB versus no PNB for THA/TKA

23-Feb-2021

## 1.67 Infection | Total

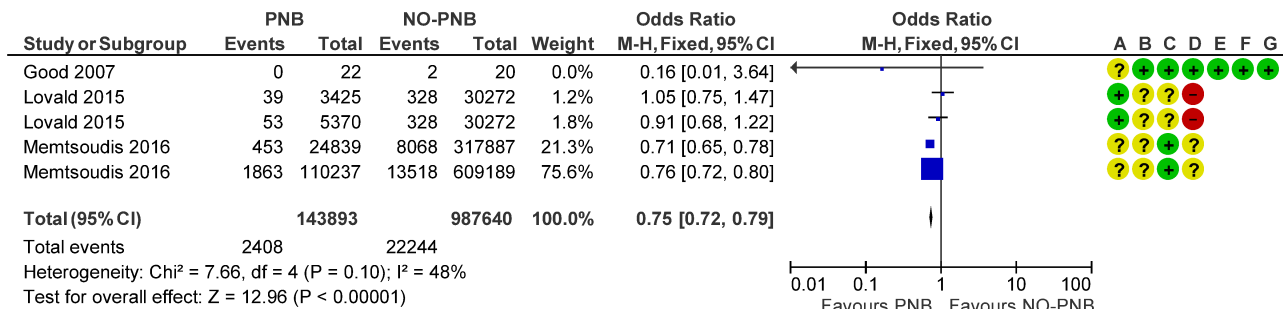

## Risk of bias legend

- (A) Random sequence generation (selection bias)
- (B) Allocation concealment (selection bias)
- (C) Blinding of participants and personnel (performance bias)
- (D) Blinding of outcome assessment (detection bias)
- (E) Incomplete outcome data (attrition bias)
- (F) Selective reporting (reporting bias)
- (G) Other bias
- (H) Observational Study: Failure to develop and apply appropriate eligibility criteria
- (I) Observational Study: Flawed measurement of exposure or outcome
- (J) Observational Study: Incomplete follow-up
- (K) Observational Study: Failure to adequately control for confounding
- (L) RCT: Selective outcome reporting
- (M) RCT: Sequence Generation
- (N) RCT: Other sources of bias
- (O) RCT: Blinding of outcome assessors
- (P) RCT: Blinding of participants and personnel
- (Q) RCT: Allocation concealment
- (R) RCT: Incomplete outcome data

PNB versus no PNB for THA/TKA

23-Feb-2021

1.68 Infection | GA/NA (THA/TKA)

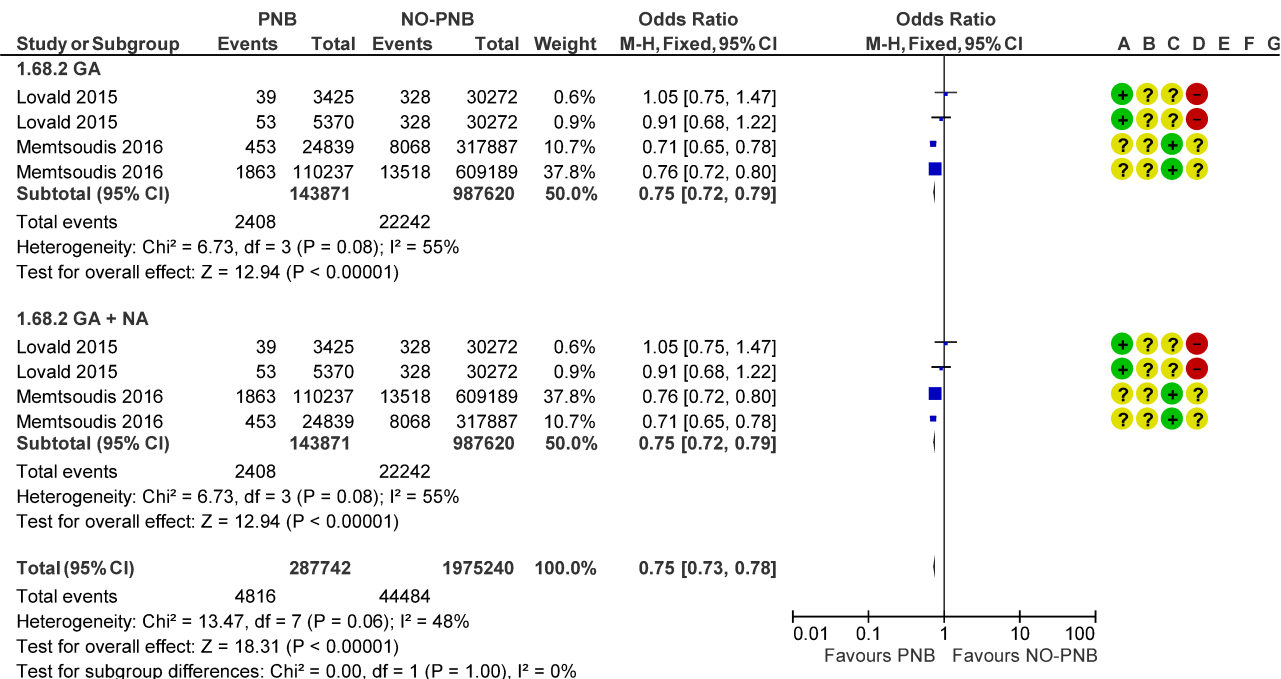

Risk of bias legend

- (A) Random sequence generation (selection bias)
- (B) Allocation concealment (selection bias)
- (C) Blinding of participants and personnel (performance bias)
- (D) Blinding of outcome assessment (detection bias)
- (E) Incomplete outcome data (attrition bias)
- (F) Selective reporting (reporting bias)
- (G) Other bias
- (H) Observational Study: Failure to develop and apply appropriate eligibility criteria
- (I) Observational Study: Flawed measurement of exposure or outcome
- (J) Observational Study: Incomplete follow-up
- (K) Observational Study: Failure to adequately control for confounding
- (L) RCT: Selective outcome reporting
- (M) RCT: Sequence Generation
- (N) RCT: Other sources of bias
- (O) RCT: Blinding of outcome assessors
- (P) RCT: Blinding of participants and personnel
- (Q) RCT: Allocation concealment
- (R) RCT: Incomplete outcome data

PNB versus no PNB for THA/TKA

23-Feb-2021

1.69 Infection | TKA

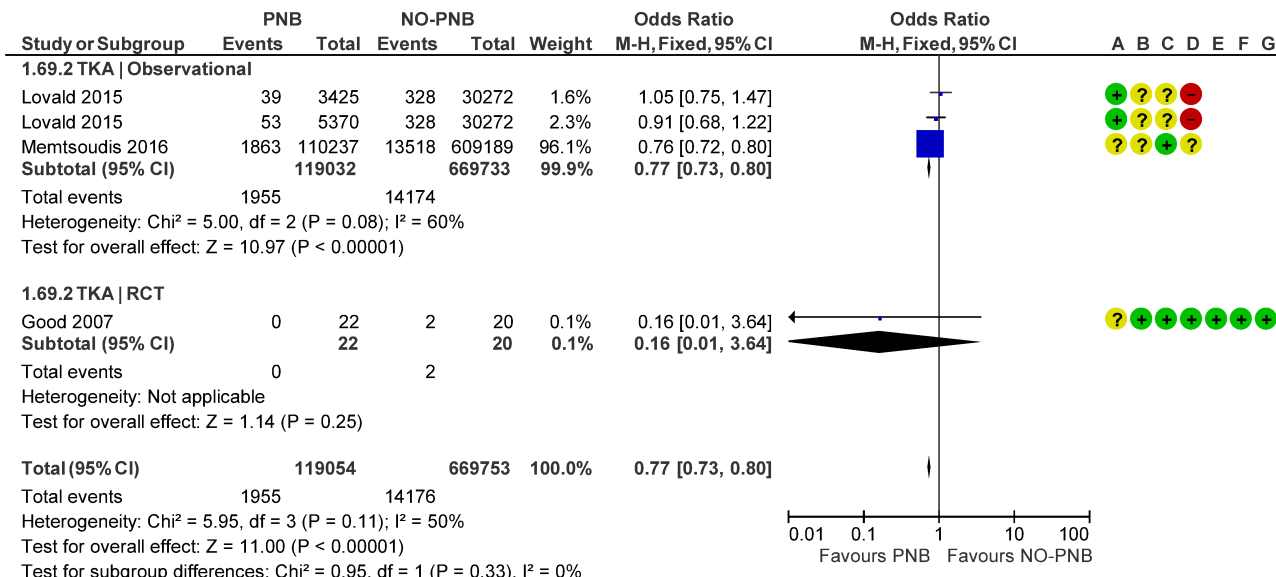

Risk of bias legend

- (A) Random sequence generation (selection bias)
- (B) Allocation concealment (selection bias)
- (C) Blinding of participants and personnel (performance bias)
- (D) Blinding of outcome assessment (detection bias)
- (E) Incomplete outcome data (attrition bias)
- (F) Selective reporting (reporting bias)
- (G) Other bias
- (H) Observational Study: Failure to develop and apply appropriate eligibility criteria
- (I) Observational Study: Flawed measurement of exposure or outcome
- (J) Observational Study: Incomplete follow-up
- (K) Observational Study: Failure to adequately control for confounding
- (L) RCT: Selective outcome reporting
- (M) RCT: Sequence Generation
- (N) RCT: Other sources of bias
- (O) RCT: Blinding of outcome assessors
- (P) RCT: Blinding of participants and personnel
- (Q) RCT: Allocation concealment
- (R) RCT: Incomplete outcome data

PNB versus no PNB for THA/TKA

23-Feb-2021

1.70 Infection | THA

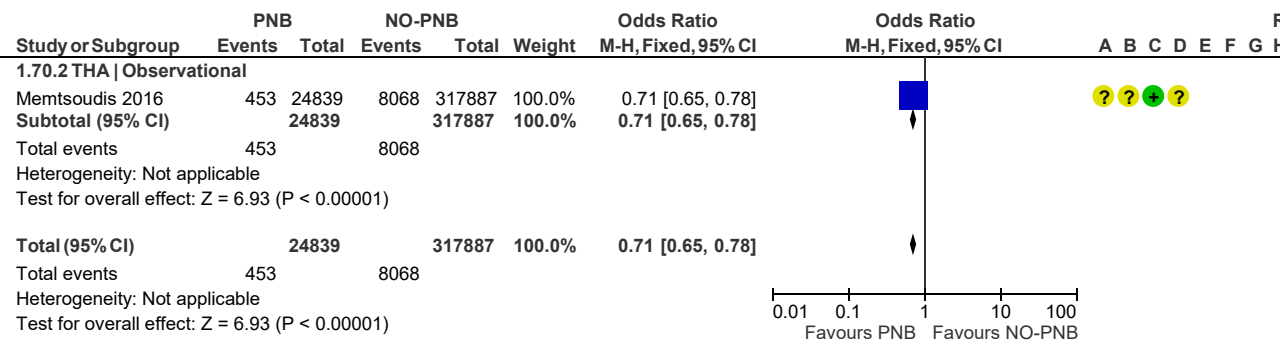

Risk of bias legend

- (A) Random sequence generation (selection bias)
- (B) Allocation concealment (selection bias)
- (C) Blinding of participants and personnel (performance bias)
- (D) Blinding of outcome assessment (detection bias)
- (E) Incomplete outcome data (attrition bias)
- (F) Selective reporting (reporting bias)
- (G) Other bias
- (H) Observational Study: Failure to develop and apply appropriate eligibility criteria
- (I) Observational Study: Flawed measurement of exposure or outcome
- (J) Observational Study: Incomplete follow-up
- (K) Observational Study: Failure to adequately control for confounding
- (L) RCT: Selective outcome reporting
- (M) RCT: Sequence Generation
- (N) RCT: Other sources of bias
- (O) RCT: Blinding of outcome assessors
- (P) RCT: Blinding of participants and personnel
- (Q) RCT: Allocation concealment
- (R) RCT: Incomplete outcome data



PNB versus no PNB for THA/TKA

23-Feb-2021

1.71 Gastrointestinal complications (composite) | Total

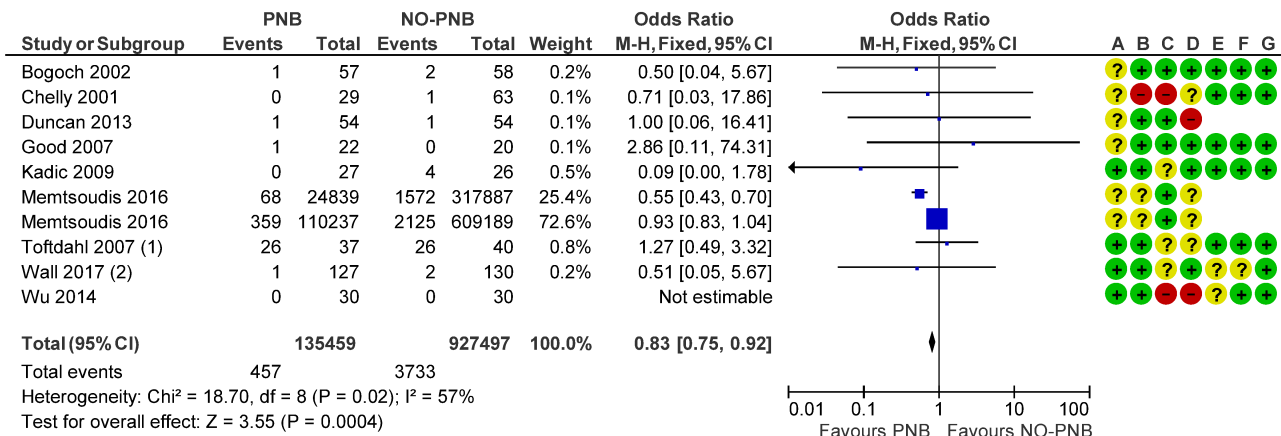

Footnotes

- (1) Constipation + Ulcer
- (2) Ileus

Risk of bias legend

- (A) Random sequence generation (selection bias)
- (B) Allocation concealment (selection bias)
- (C) Blinding of participants and personnel (performance bias)
- (D) Blinding of outcome assessment (detection bias)
- (E) Incomplete outcome data (attrition bias)
- (F) Selective reporting (reporting bias)
- (G) Other bias
- (H) Observational Study: Failure to develop and apply appropriate
- (I) Observational Study: Flawed measurement of exposure
- (J) Observational Study: Incomplete follow-up
- (K) Observational Study: Failure to adequately control for confounding
- (L) RCT: Selective outcome reporting
- (M) RCT: Sequence Generation
- (N) RCT: Other sources of bias
- (O) RCT: Blinding of outcome assessors
- (P) RCT: Blinding of participants and personnel
- (Q) RCT: Allocation concealment
- (R) RCT: Incomplete outcome data

PNB versus no PNB for THA/TKA

23-Feb-2021

1.72 Gastrointestinal complications (composite) | GA/NA (THA/TKA)

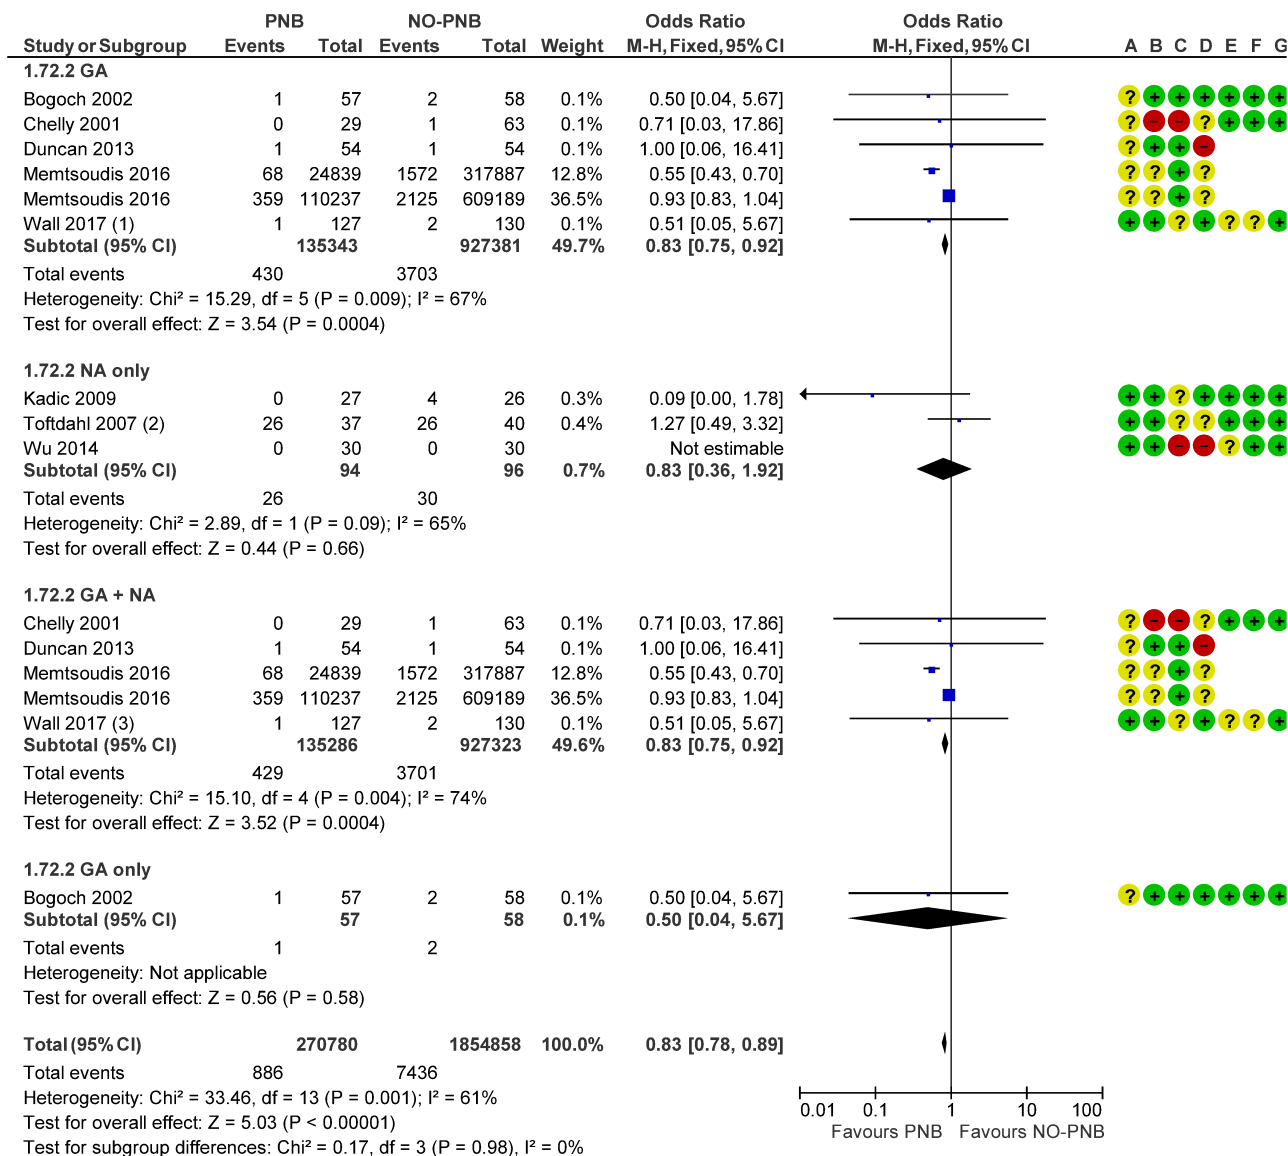

Footnotes

- (1) Ileus
- (2) Constipation + Ulcer
- (3) Ileus

Risk of bias legend

- (A) Random sequence generation (selection bias)
- (B) Allocation concealment (selection bias)
- (C) Blinding of participants and personnel (performance bias)
- (D) Blinding of outcome assessment (detection bias)
- (E) Incomplete outcome data (attrition bias)
- (F) Selective reporting (reporting bias)
- (G) Other bias
- (H) Observational Study: Failure to develop and apply appropriate
- (I) Observational Study: Flawed measurement of exposure
- (J) Observational Study: Incomplete follow-up
- (K) Observational Study: Failure to adequately control for confounding
- (L) RCT: Selective outcome reporting
- (M) RCT: Sequence Generation
- (N) RCT: Other sources of bias
- (O) RCT: Blinding of outcome assessors
- (P) RCT: Blinding of participants and personnel

PNB versus no PNB for THA/TKA

23-Feb-2021

- (P) RCT: Blinding of participants and personnel
- (Q) RCT: Allocation concealment
- (R) RCT: Incomplete outcome data

PNB versus no PNB for THA/TKA

23-Feb-2021

1.73 Gastrointestinal complications (composite) | TKA

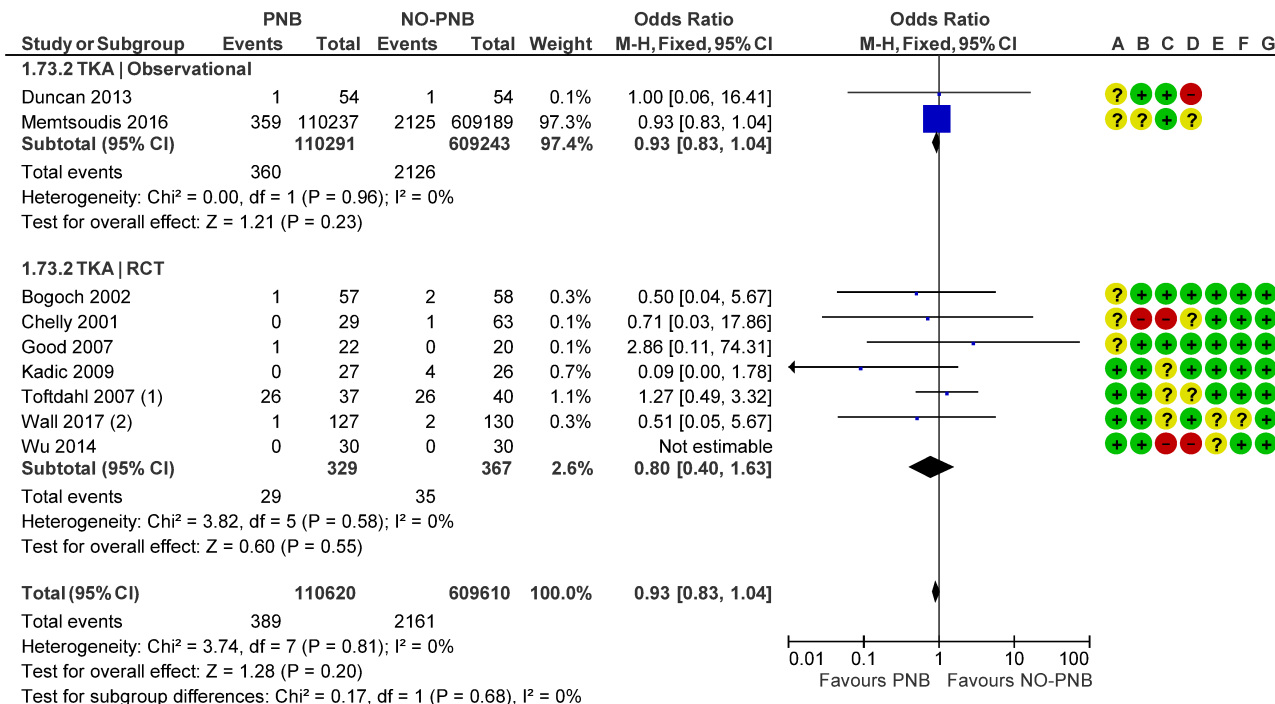

**Footnotes**  
 (1) Constipation + Ulcer  
 (2) Ileus

- Risk of bias legend**
- (A) Random sequence generation (selection bias)
  - (B) Allocation concealment (selection bias)
  - (C) Blinding of participants and personnel (performance bias)
  - (D) Blinding of outcome assessment (detection bias)
  - (E) Incomplete outcome data (attrition bias)
  - (F) Selective reporting (reporting bias)
  - (G) Other bias
  - (H) Observational Study: Failure to develop and apply appropriate
  - (I) Observational Study: Flawed measurement of exposure or
  - (J) Observational Study: Incomplete follow-up
  - (K) Observational Study: Failure to adequately control for confounding
  - (L) RCT: Selective outcome reporting
  - (M) RCT: Sequence Generation
  - (N) RCT: Other sources of bias
  - (O) RCT: Blinding of outcome assessors
  - (P) RCT: Blinding of participants and personnel
  - (Q) RCT: Allocation concealment
  - (R) RCT: Incomplete outcome data

PNB versus no PNB for THA/TKA

23-Feb-2021

1.74 Gastrointestinal complications (composite) | THA

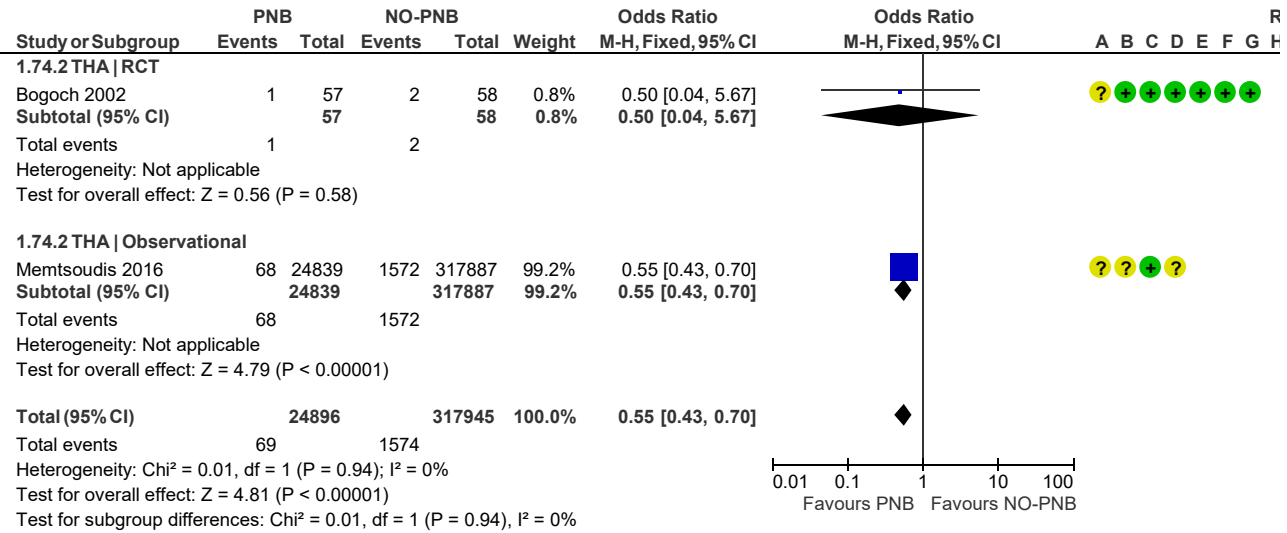

Risk of bias legend

- (A) Random sequence generation (selection bias)
- (B) Allocation concealment (selection bias)
- (C) Blinding of participants and personnel (performance bias)
- (D) Blinding of outcome assessment (detection bias)
- (E) Incomplete outcome data (attrition bias)
- (F) Selective reporting (reporting bias)
- (G) Other bias
- (H) Observational Study: Failure to develop and apply appropriate eligibility criteria
- (I) Observational Study: Flawed measurement of exposure or outcome
- (J) Observational Study: Incomplete follow-up
- (K) Observational Study: Failure to adequately control for confounding
- (L) RCT: Selective outcome reporting
- (M) RCT: Sequence Generation
- (N) RCT: Other sources of bias
- (O) RCT: Blinding of outcome assessors
- (P) RCT: Blinding of participants and personnel
- (Q) RCT: Allocation concealment
- (R) RCT: Incomplete outcome data

PNB versus no PNB for THA/TKA

23-Feb-2021

1.75 Renal complications (composite) | GA/NA (THA/TKA)

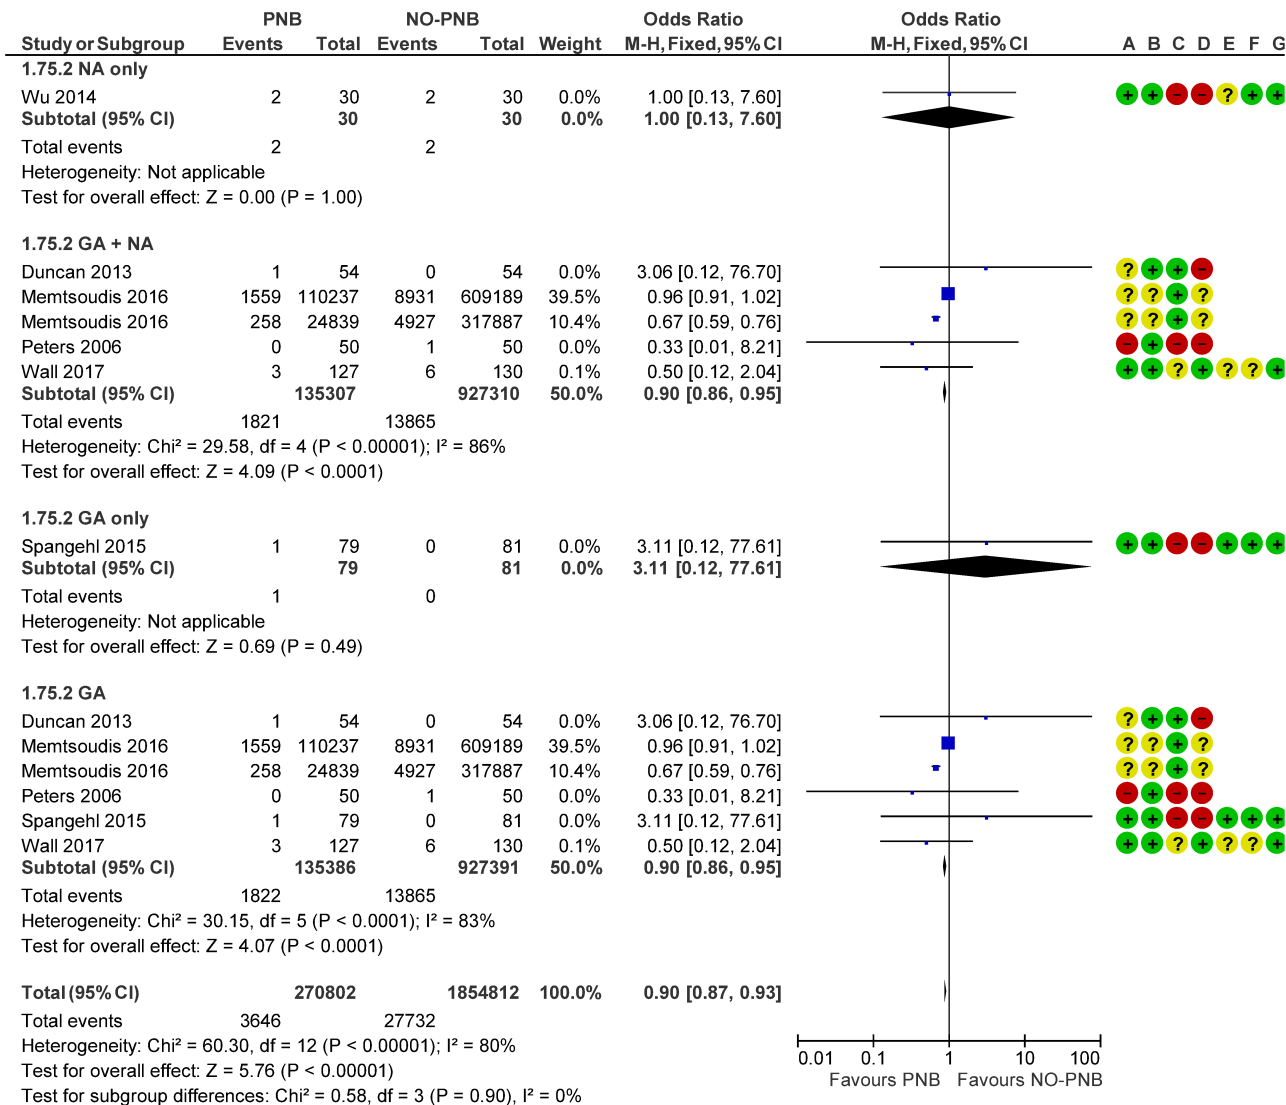

Risk of bias legend

- (A) Random sequence generation (selection bias)
- (B) Allocation concealment (selection bias)
- (C) Blinding of participants and personnel (performance bias)
- (D) Blinding of outcome assessment (detection bias)
- (E) Incomplete outcome data (attrition bias)
- (F) Selective reporting (reporting bias)
- (G) Other bias
- (H) Observational Study: Failure to develop and apply appropriate eligibility criteria
- (I) Observational Study: Flawed measurement of exposure or outcome
- (J) Observational Study: Incomplete follow-up
- (K) Observational Study: Failure to adequately control for confounding
- (L) RCT: Selective outcome reporting
- (M) RCT: Sequence Generation
- (N) RCT: Other sources of bias
- (O) RCT: Blinding of outcome assessors
- (P) RCT: Blinding of participants and personnel
- (Q) RCT: Allocation concealment
- (R) RCT: Incomplete outcome data

PNB versus no PNB for THA/TKA

23-Feb-2021

(R) RCT: incomplete outcome data

1.76 Renal complications (composite) | Total

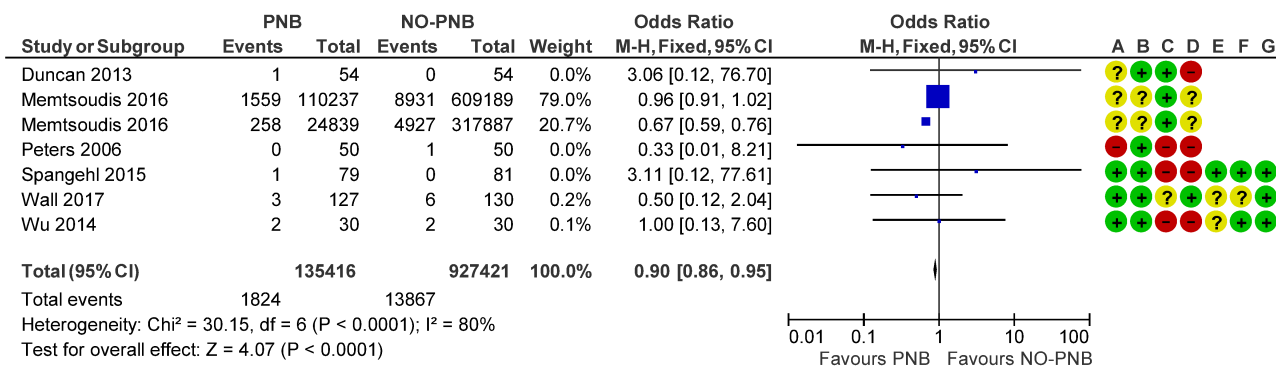

Risk of bias legend

- (A) Random sequence generation (selection bias)
- (B) Allocation concealment (selection bias)
- (C) Blinding of participants and personnel (performance bias)
- (D) Blinding of outcome assessment (detection bias)
- (E) Incomplete outcome data (attrition bias)
- (F) Selective reporting (reporting bias)
- (G) Other bias
- (H) Observational Study: Failure to develop and apply appropriate eligibility criteria
- (I) Observational Study: Flawed measurement of exposure or outcome
- (J) Observational Study: Incomplete follow-up
- (K) Observational Study: Failure to adequately control for confounding
- (L) RCT: Selective outcome reporting
- (M) RCT: Sequence Generation
- (N) RCT: Other sources of bias
- (O) RCT: Blinding of outcome assessors
- (P) RCT: Blinding of participants and personnel
- (Q) RCT: Allocation concealment
- (R) RCT: Incomplete outcome data

PNB versus no PNB for THA/TKA

23-Feb-2021

1.77 Renal complications (composite) | TKA

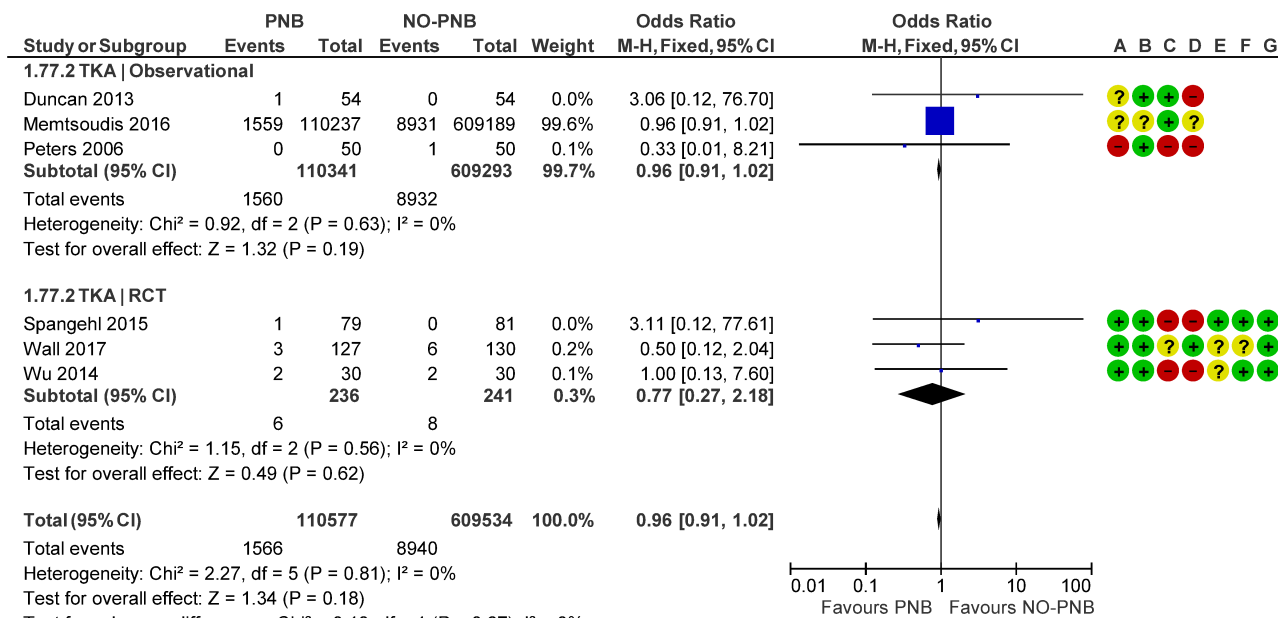

Risk of bias legend

- (A) Random sequence generation (selection bias)
- (B) Allocation concealment (selection bias)
- (C) Blinding of participants and personnel (performance bias)
- (D) Blinding of outcome assessment (detection bias)
- (E) Incomplete outcome data (attrition bias)
- (F) Selective reporting (reporting bias)
- (G) Other bias
- (H) Observational Study: Failure to develop and apply appropriate eligibility criteria
- (I) Observational Study: Flawed measurement of exposure or outcome
- (J) Observational Study: Incomplete follow-up
- (K) Observational Study: Failure to adequately control for confounding
- (L) RCT: Selective outcome reporting
- (M) RCT: Sequence Generation
- (N) RCT: Other sources of bias
- (O) RCT: Blinding of outcome assessors
- (P) RCT: Blinding of participants and personnel
- (Q) RCT: Allocation concealment
- (R) RCT: Incomplete outcome data



PNB versus no PNB for THA/TKA

23-Feb-2021

1.78 Renal complications (composite) | THA

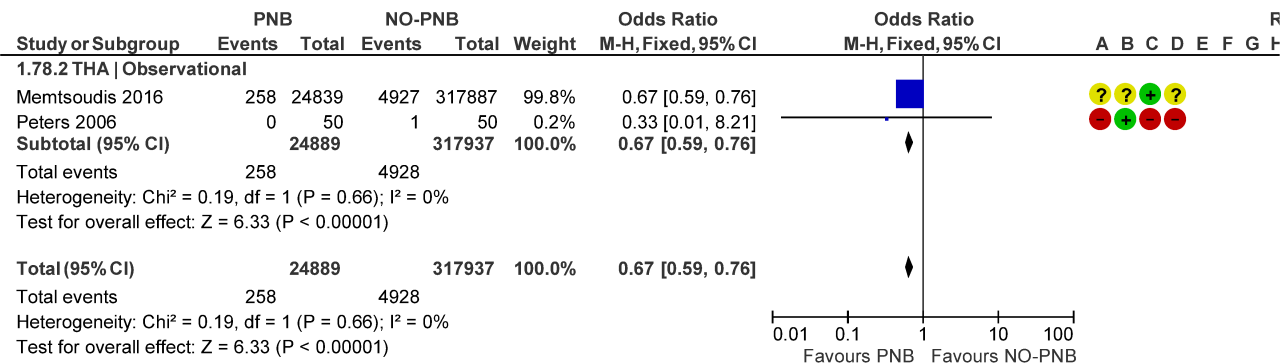

Risk of bias legend

- (A) Random sequence generation (selection bias)
- (B) Allocation concealment (selection bias)
- (C) Blinding of participants and personnel (performance bias)
- (D) Blinding of outcome assessment (detection bias)
- (E) Incomplete outcome data (attrition bias)
- (F) Selective reporting (reporting bias)
- (G) Other bias
- (H) Observational Study: Failure to develop and apply appropriate eligibility criteria
- (I) Observational Study: Flawed measurement of exposure or outcome
- (J) Observational Study: Incomplete follow-up
- (K) Observational Study: Failure to adequately control for confounding
- (L) RCT: Selective outcome reporting
- (M) RCT: Sequence Generation
- (N) RCT: Other sources of bias
- (O) RCT: Blinding of outcome assessors
- (P) RCT: Blinding of participants and personnel
- (Q) RCT: Allocation concealment
- (R) RCT: Incomplete outcome data

**PNB versus no PNB for THA/TKA**

23-Feb-2021

**1.79 Renal failure (composite) | GA/NA (THA/TKA)**

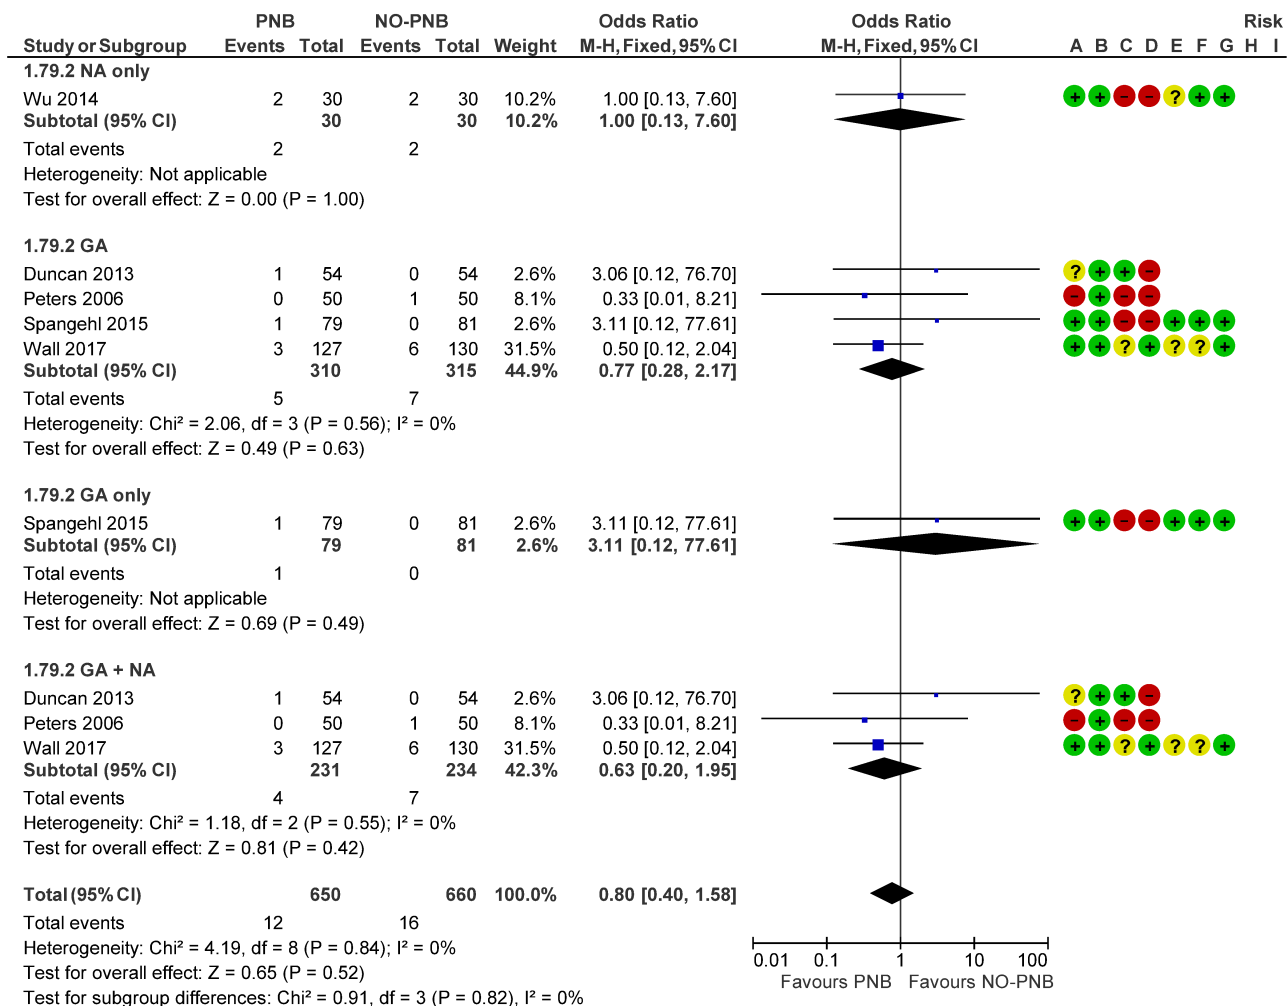

Risk of bias legend

- (A) Random sequence generation (selection bias)
- (B) Allocation concealment (selection bias)
- (C) Blinding of participants and personnel (performance bias)
- (D) Blinding of outcome assessment (detection bias)
- (E) Incomplete outcome data (attrition bias)
- (F) Selective reporting (reporting bias)
- (G) Other bias
- (H) Observational Study: Failure to develop and apply appropriate eligibility criteria
- (I) Observational Study: Flawed measurement of exposure or outcome
- (J) Observational Study: Incomplete follow-up
- (K) Observational Study: Failure to adequately control for confounding
- (L) RCT: Selective outcome reporting
- (M) RCT: Sequence Generation
- (N) RCT: Other sources of bias
- (O) RCT: Blinding of outcome assessors
- (P) RCT: Blinding of participants and personnel
- (Q) RCT: Allocation concealment
- (R) RCT: Incomplete outcome data

PNB versus no PNB for THA/TKA

23-Feb-2021

1.80 Renal failure (composite) | Total

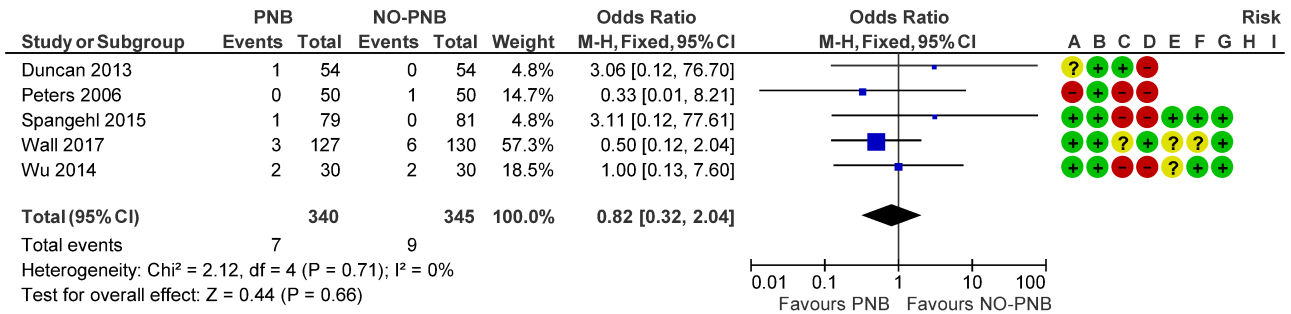

Risk of bias legend

- (A) Random sequence generation (selection bias)
- (B) Allocation concealment (selection bias)
- (C) Blinding of participants and personnel (performance bias)
- (D) Blinding of outcome assessment (detection bias)
- (E) Incomplete outcome data (attrition bias)
- (F) Selective reporting (reporting bias)
- (G) Other bias
- (H) Observational Study: Failure to develop and apply appropriate eligibility criteria
- (I) Observational Study: Flawed measurement of exposure or outcome
- (J) Observational Study: Incomplete follow-up
- (K) Observational Study: Failure to adequately control for confounding
- (L) RCT: Selective outcome reporting
- (M) RCT: Sequence Generation
- (N) RCT: Other sources of bias
- (O) RCT: Blinding of outcome assessors
- (P) RCT: Blinding of participants and personnel
- (Q) RCT: Allocation concealment
- (R) RCT: Incomplete outcome data

PNB versus no PNB for THA/TKA

23-Feb-2021

1.81 Renal failure (composite) | TKA

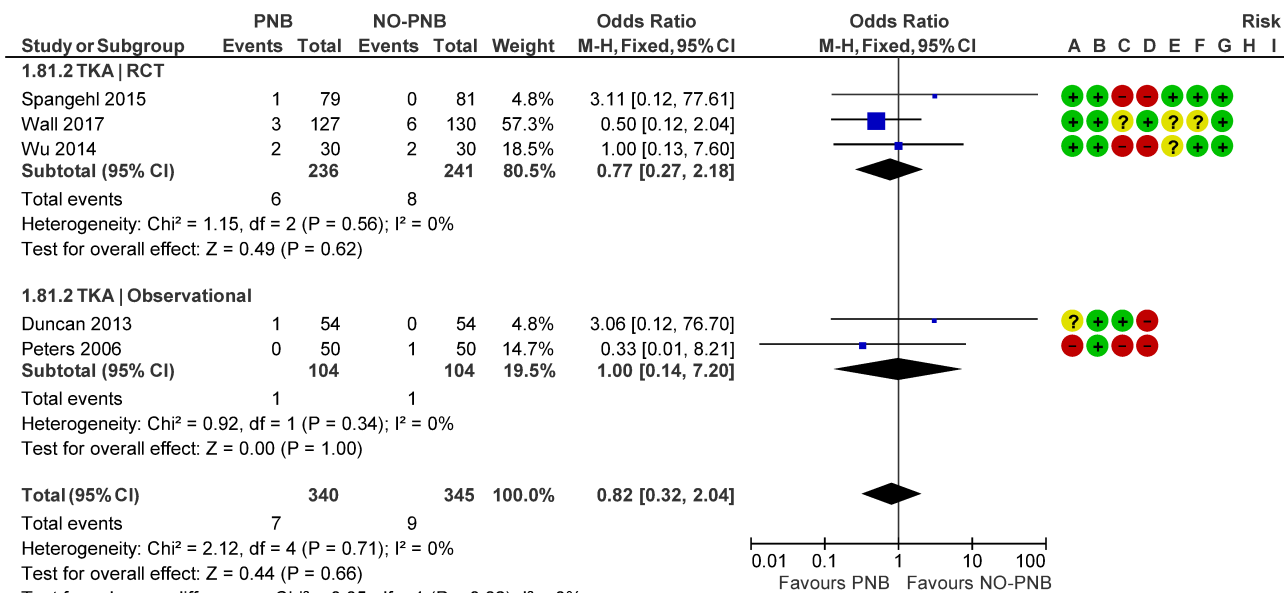

Risk of bias legend

- (A) Random sequence generation (selection bias)
- (B) Allocation concealment (selection bias)
- (C) Blinding of participants and personnel (performance bias)
- (D) Blinding of outcome assessment (detection bias)
- (E) Incomplete outcome data (attrition bias)
- (F) Selective reporting (reporting bias)
- (G) Other bias
- (H) Observational Study: Failure to develop and apply appropriate eligibility criteria
- (I) Observational Study: Flawed measurement of exposure or outcome
- (J) Observational Study: Incomplete follow-up
- (K) Observational Study: Failure to adequately control for confounding
- (L) RCT: Selective outcome reporting
- (M) RCT: Sequence Generation
- (N) RCT: Other sources of bias
- (O) RCT: Blinding of outcome assessors
- (P) RCT: Blinding of participants and personnel
- (Q) RCT: Allocation concealment
- (R) RCT: Incomplete outcome data

PNB versus no PNB for THA/TKA

23-Feb-2021

1.82 Renal failure (composite) | THA

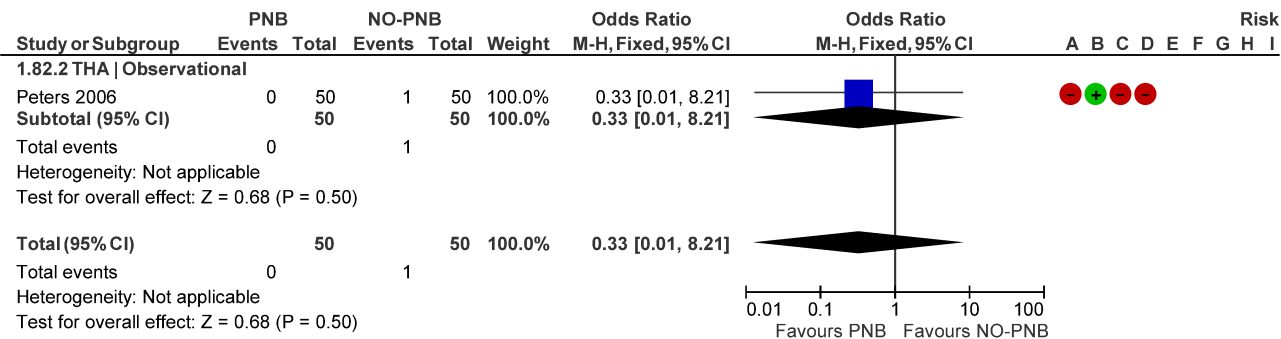

Risk of bias legend

- (A) Random sequence generation (selection bias)
- (B) Allocation concealment (selection bias)
- (C) Blinding of participants and personnel (performance bias)
- (D) Blinding of outcome assessment (detection bias)
- (E) Incomplete outcome data (attrition bias)
- (F) Selective reporting (reporting bias)
- (G) Other bias
- (H) Observational Study: Failure to develop and apply appropriate eligibility criteria
- (I) Observational Study: Flawed measurement of exposure or outcome
- (J) Observational Study: Incomplete follow-up
- (K) Observational Study: Failure to adequately control for confounding
- (L) RCT: Selective outcome reporting
- (M) RCT: Sequence Generation
- (N) RCT: Other sources of bias
- (O) RCT: Blinding of outcome assessors
- (P) RCT: Blinding of participants and personnel
- (Q) RCT: Allocation concealment
- (R) RCT: Incomplete outcome data

PNB versus no PNB for THA/TKA

23-Feb-2021

1.83 Critical care admission | GA/NA (THA/TKA)

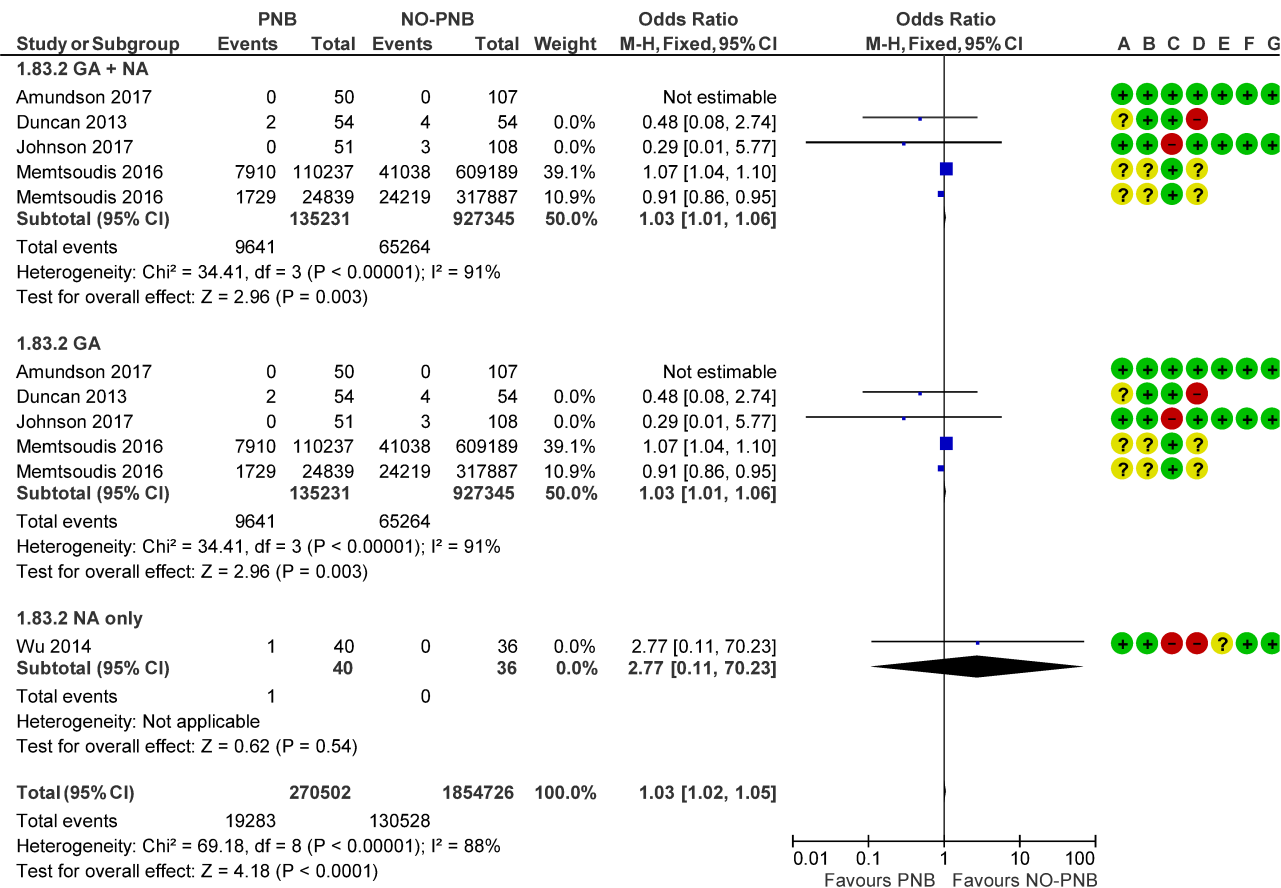

Risk of bias legend

- (A) Random sequence generation (selection bias)
- (B) Allocation concealment (selection bias)
- (C) Blinding of participants and personnel (performance bias)
- (D) Blinding of outcome assessment (detection bias)
- (E) Incomplete outcome data (attrition bias)
- (F) Selective reporting (reporting bias)
- (G) Other bias
- (H) Observational Study: Failure to develop and apply appropriate eligibility criteria
- (I) Observational Study: Flawed measurement of exposure or outcome
- (J) Observational Study: Incomplete follow-up
- (K) Observational Study: Failure to adequately control for confounding
- (L) RCT: Selective outcome reporting
- (M) RCT: Sequence Generation
- (N) RCT: Other sources of bias
- (O) RCT: Blinding of outcome assessors
- (P) RCT: Blinding of participants and personnel
- (Q) RCT: Allocation concealment
- (R) RCT: Incomplete outcome data

PNB versus no PNB for THA/TKA

23-Feb-2021

1.84 Critical care admission | Total

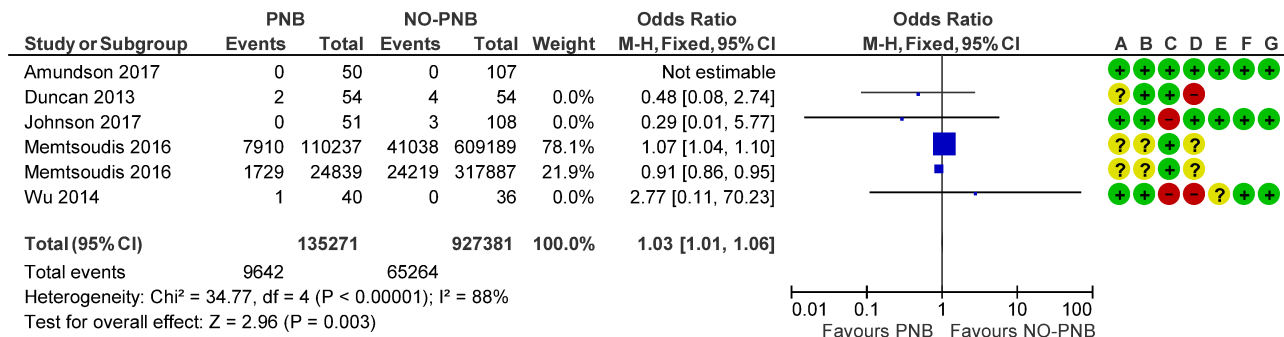

Risk of bias legend

- (A) Random sequence generation (selection bias)
- (B) Allocation concealment (selection bias)
- (C) Blinding of participants and personnel (performance bias)
- (D) Blinding of outcome assessment (detection bias)
- (E) Incomplete outcome data (attrition bias)
- (F) Selective reporting (reporting bias)
- (G) Other bias
- (H) Observational Study: Failure to develop and apply appropriate eligibility criteria
- (I) Observational Study: Flawed measurement of exposure or outcome
- (J) Observational Study: Incomplete follow-up
- (K) Observational Study: Failure to adequately control for confounding
- (L) RCT: Selective outcome reporting
- (M) RCT: Sequence Generation
- (N) RCT: Other sources of bias
- (O) RCT: Blinding of outcome assessors
- (P) RCT: Blinding of participants and personnel
- (Q) RCT: Allocation concealment
- (R) RCT: Incomplete outcome data

PNB versus no PNB for THA/TKA

23-Feb-2021

1.85 Critical care admission | TKA

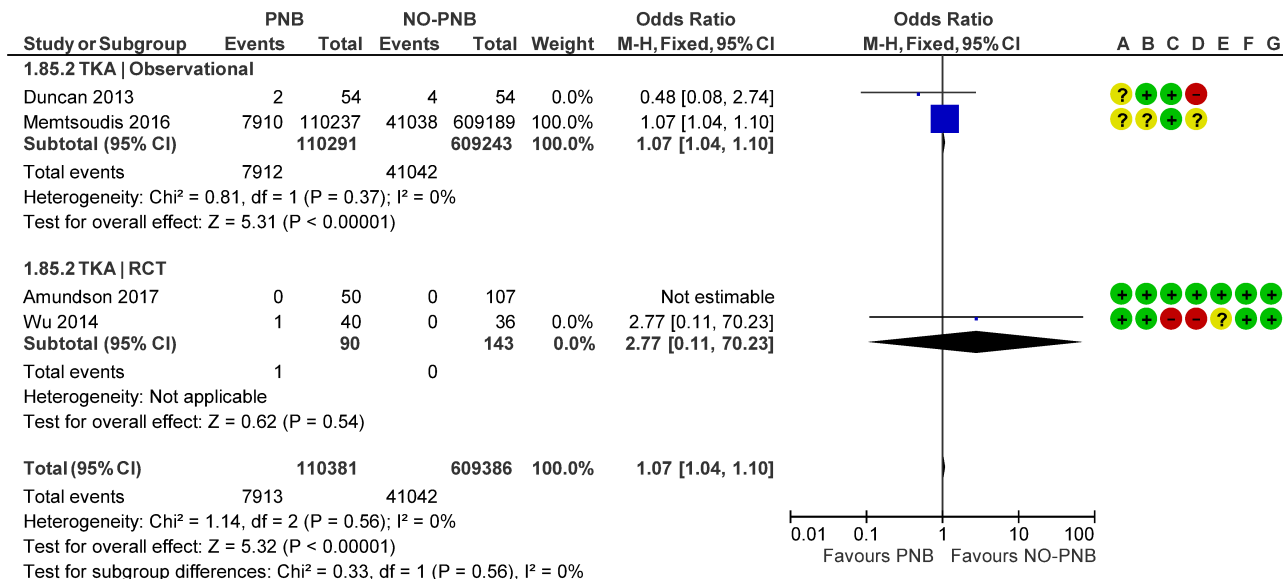

Risk of bias legend

- (A) Random sequence generation (selection bias)
- (B) Allocation concealment (selection bias)
- (C) Blinding of participants and personnel (performance bias)
- (D) Blinding of outcome assessment (detection bias)
- (E) Incomplete outcome data (attrition bias)
- (F) Selective reporting (reporting bias)
- (G) Other bias
- (H) Observational Study: Failure to develop and apply appropriate eligibility criteria
- (I) Observational Study: Flawed measurement of exposure or outcome
- (J) Observational Study: Incomplete follow-up
- (K) Observational Study: Failure to adequately control for confounding
- (L) RCT: Selective outcome reporting
- (M) RCT: Sequence Generation
- (N) RCT: Other sources of bias
- (O) RCT: Blinding of outcome assessors
- (P) RCT: Blinding of participants and personnel
- (Q) RCT: Allocation concealment
- (R) RCT: Incomplete outcome data



## PNB versus no PNB for THA/TKA

23-Feb-2021

## 1.86 Critical care admission | THA

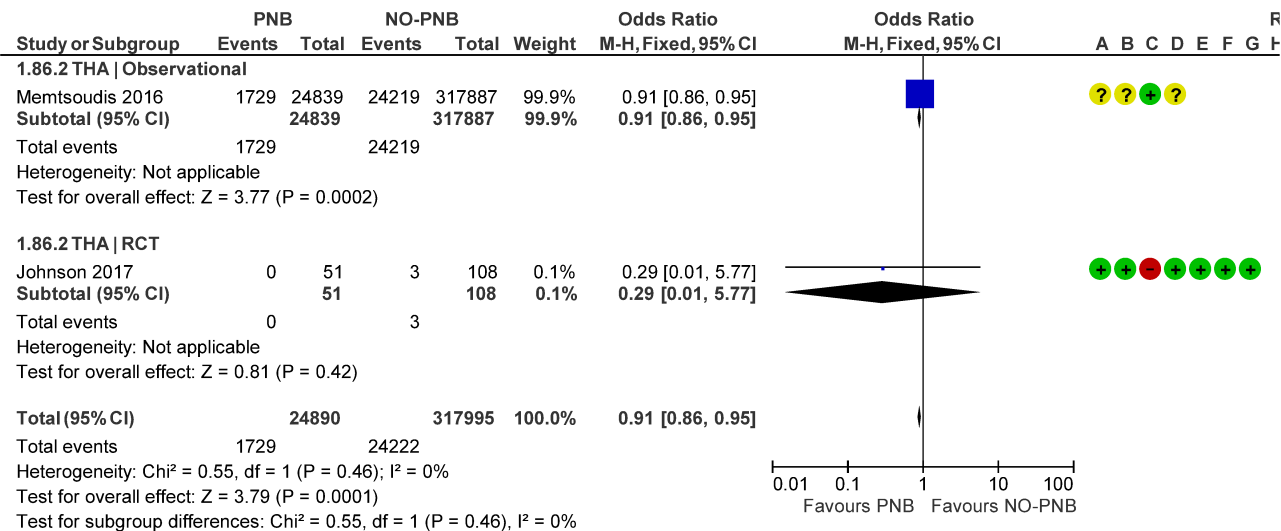

## Risk of bias legend

- (A) Random sequence generation (selection bias)
- (B) Allocation concealment (selection bias)
- (C) Blinding of participants and personnel (performance bias)
- (D) Blinding of outcome assessment (detection bias)
- (E) Incomplete outcome data (attrition bias)
- (F) Selective reporting (reporting bias)
- (G) Other bias
- (H) Observational Study: Failure to develop and apply appropriate eligibility criteria
- (I) Observational Study: Flawed measurement of exposure or outcome
- (J) Observational Study: Incomplete follow-up
- (K) Observational Study: Failure to adequately control for confounding
- (L) RCT: Selective outcome reporting
- (M) RCT: Sequence Generation
- (N) RCT: Other sources of bias
- (O) RCT: Blinding of outcome assessors
- (P) RCT: Blinding of participants and personnel
- (Q) RCT: Allocation concealment
- (R) RCT: Incomplete outcome data

PNB versus no PNB for THA/TKA

23-Feb-2021

1.87 Readmission|GA/NA (THA/TKA)

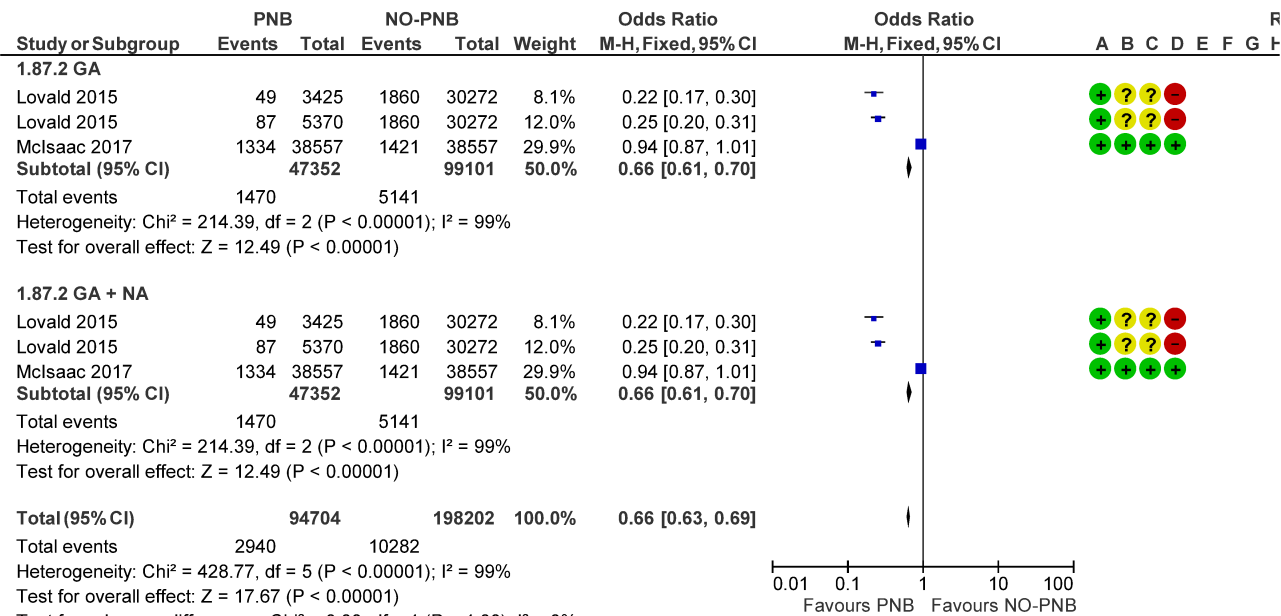

Risk of bias legend

- (A) Random sequence generation (selection bias)
- (B) Allocation concealment (selection bias)
- (C) Blinding of participants and personnel (performance bias)
- (D) Blinding of outcome assessment (detection bias)
- (E) Incomplete outcome data (attrition bias)
- (F) Selective reporting (reporting bias)
- (G) Other bias
- (H) Observational Study: Failure to develop and apply appropriate eligibility criteria
- (I) Observational Study: Flawed measurement of exposure or outcome
- (J) Observational Study: Incomplete follow-up
- (K) Observational Study: Failure to adequately control for confounding
- (L) RCT: Selective outcome reporting
- (M) RCT: Sequence Generation
- (N) RCT: Other sources of bias
- (O) RCT: Blinding of outcome assessors
- (P) RCT: Blinding of participants and personnel
- (Q) RCT: Allocation concealment
- (R) RCT: Incomplete outcome data

PNB versus no PNB for THA/TKA

23-Feb-2021

1.88 Readmission | TKA

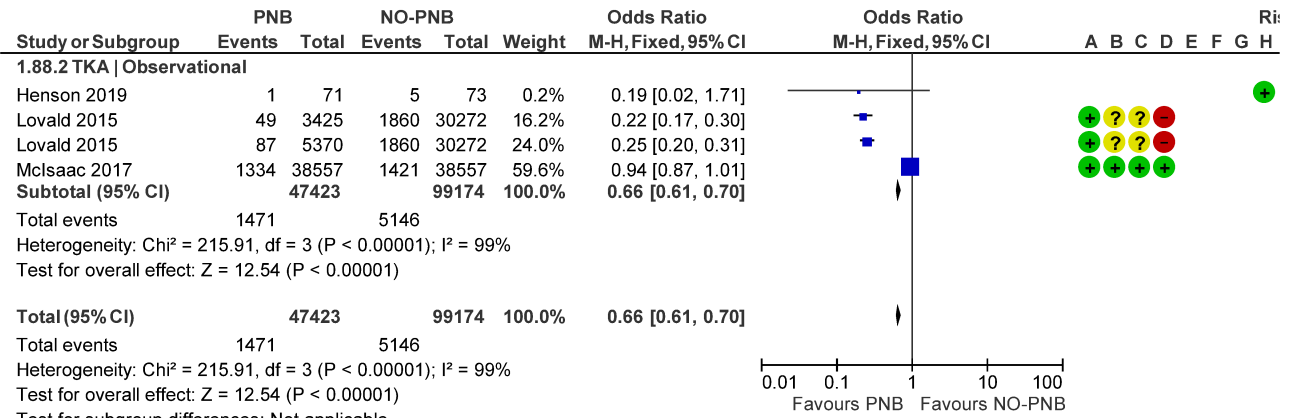

Risk of bias legend

- (A) Random sequence generation (selection bias)
- (B) Allocation concealment (selection bias)
- (C) Blinding of participants and personnel (performance bias)
- (D) Blinding of outcome assessment (detection bias)
- (E) Incomplete outcome data (attrition bias)
- (F) Selective reporting (reporting bias)
- (G) Other bias
- (H) Observational Study: Failure to develop and apply appropriate eligibility criteria
- (I) Observational Study: Flawed measurement of exposure or outcome
- (J) Observational Study: Incomplete follow-up
- (K) Observational Study: Failure to adequately control for confounding
- (L) RCT: Selective outcome reporting
- (M) RCT: Sequence Generation
- (N) RCT: Other sources of bias
- (O) RCT: Blinding of outcome assessors
- (P) RCT: Blinding of participants and personnel
- (Q) RCT: Allocation concealment
- (R) RCT: Incomplete outcome data

## PNB versus no PNB for THA/TKA

23-Feb-2021

## 1.89 Readmission | Total

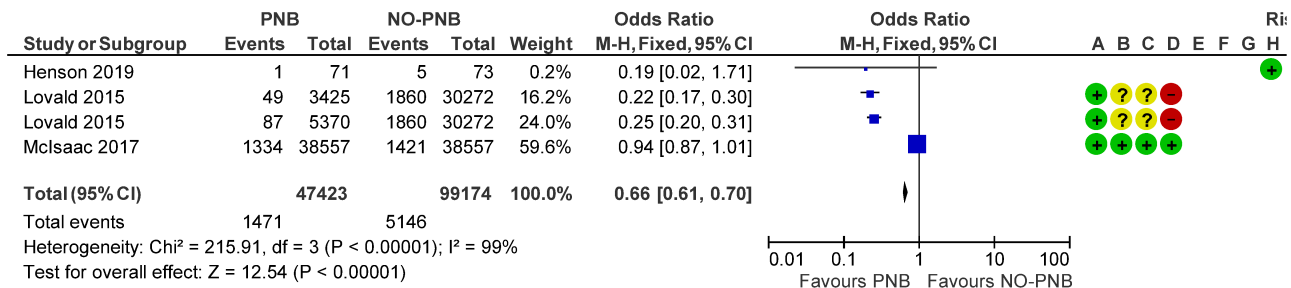

## Risk of bias legend

- (A) Random sequence generation (selection bias)
- (B) Allocation concealment (selection bias)
- (C) Blinding of participants and personnel (performance bias)
- (D) Blinding of outcome assessment (detection bias)
- (E) Incomplete outcome data (attrition bias)
- (F) Selective reporting (reporting bias)
- (G) Other bias
- (H) Observational Study: Failure to develop and apply appropriate eligibility criteria
- (I) Observational Study: Flawed measurement of exposure or outcome
- (J) Observational Study: Incomplete follow-up
- (K) Observational Study: Failure to adequately control for confounding
- (L) RCT: Selective outcome reporting
- (M) RCT: Sequence Generation
- (N) RCT: Other sources of bias
- (O) RCT: Blinding of outcome assessors
- (P) RCT: Blinding of participants and personnel
- (Q) RCT: Allocation concealment
- (R) RCT: Incomplete outcome data

PNB versus no PNB for THA/TKA

23-Feb-2021

1.90 Blood transfusion | TKA

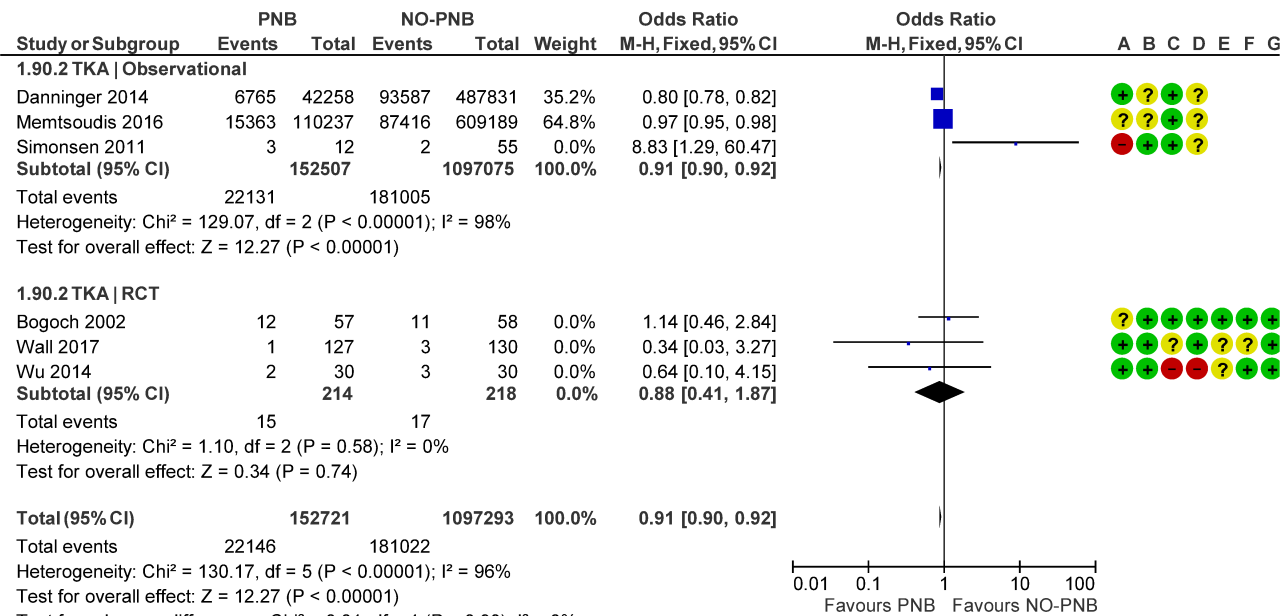

Risk of bias legend

- (A) Random sequence generation (selection bias)
- (B) Allocation concealment (selection bias)
- (C) Blinding of participants and personnel (performance bias)
- (D) Blinding of outcome assessment (detection bias)
- (E) Incomplete outcome data (attrition bias)
- (F) Selective reporting (reporting bias)
- (G) Other bias
- (H) Observational Study: Failure to develop and apply appropriate eligibility criteria
- (I) Observational Study: Flawed measurement of exposure or outcome
- (J) Observational Study: Incomplete follow-up
- (K) Observational Study: Failure to adequately control for confounding
- (L) RCT: Selective outcome reporting
- (M) RCT: Sequence Generation
- (N) RCT: Other sources of bias
- (O) RCT: Blinding of outcome assessors
- (P) RCT: Blinding of participants and personnel
- (Q) RCT: Allocation concealment
- (R) RCT: Incomplete outcome data

PNB versus no PNB for THA/TKA

23-Feb-2021

1.91 Blood transfusion | Total

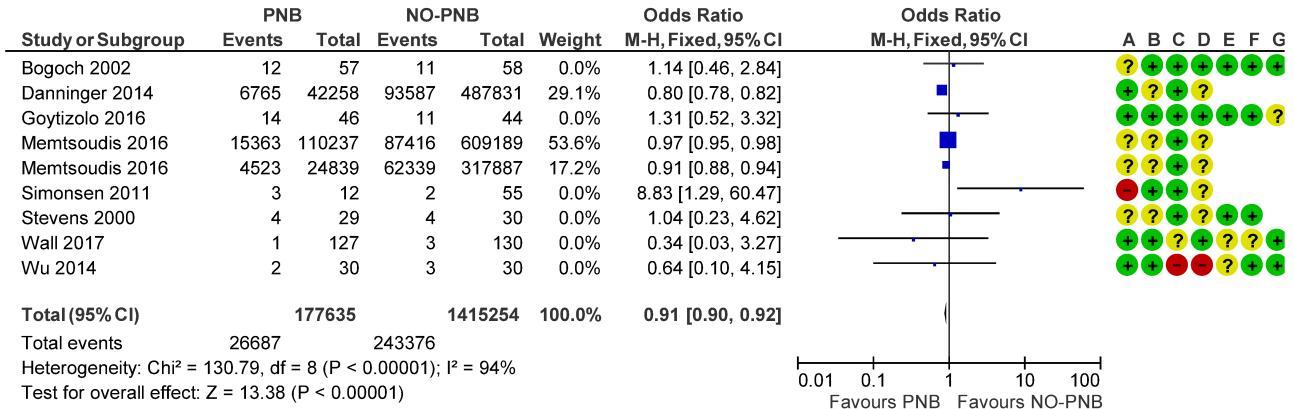

Risk of bias legend

- (A) Random sequence generation (selection bias)
- (B) Allocation concealment (selection bias)
- (C) Blinding of participants and personnel (performance bias)
- (D) Blinding of outcome assessment (detection bias)
- (E) Incomplete outcome data (attrition bias)
- (F) Selective reporting (reporting bias)
- (G) Other bias
- (H) Observational Study: Failure to develop and apply appropriate eligibility criteria
- (I) Observational Study: Flawed measurement of exposure or outcome
- (J) Observational Study: Incomplete follow-up
- (K) Observational Study: Failure to adequately control for confounding
- (L) RCT: Selective outcome reporting
- (M) RCT: Sequence Generation
- (N) RCT: Other sources of bias
- (O) RCT: Blinding of outcome assessors
- (P) RCT: Blinding of participants and personnel
- (Q) RCT: Allocation concealment
- (R) RCT: Incomplete outcome data

PNB versus no PNB for THA/TKA

23-Feb-2021

1.92 Blood transfusion | THA

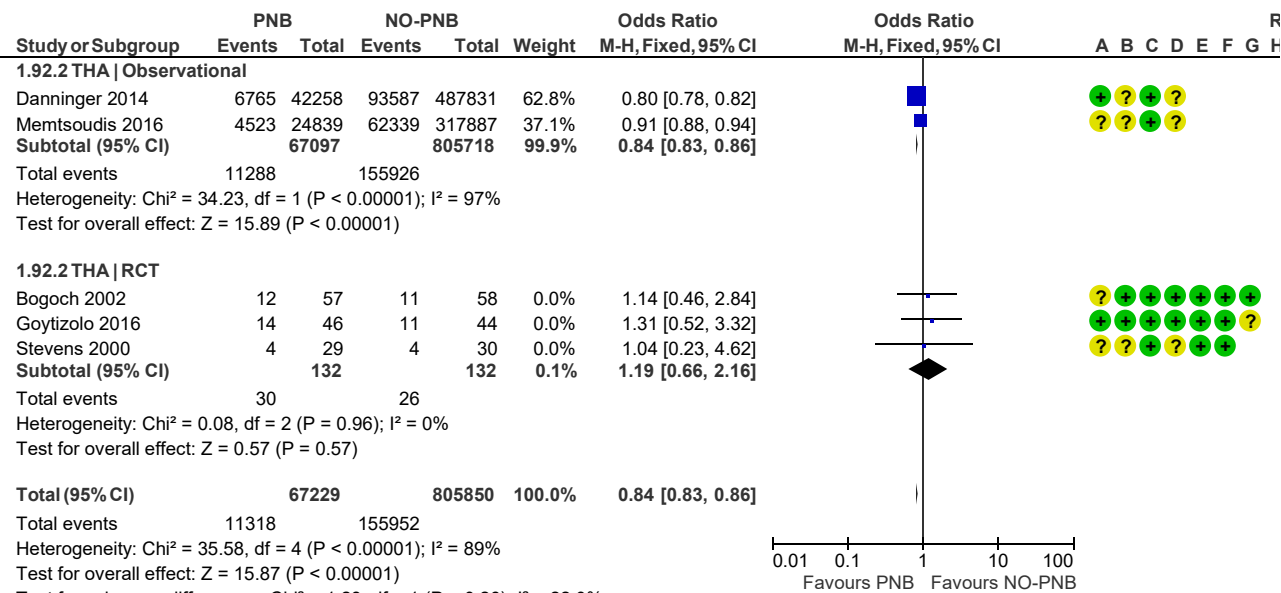

Risk of bias legend

- (A) Random sequence generation (selection bias)
- (B) Allocation concealment (selection bias)
- (C) Blinding of participants and personnel (performance bias)
- (D) Blinding of outcome assessment (detection bias)
- (E) Incomplete outcome data (attrition bias)
- (F) Selective reporting (reporting bias)
- (G) Other bias
- (H) Observational Study: Failure to develop and apply appropriate eligibility criteria
- (I) Observational Study: Flawed measurement of exposure or outcome
- (J) Observational Study: Incomplete follow-up
- (K) Observational Study: Failure to adequately control for confounding
- (L) RCT: Selective outcome reporting
- (M) RCT: Sequence Generation
- (N) RCT: Other sources of bias
- (O) RCT: Blinding of outcome assessors
- (P) RCT: Blinding of participants and personnel
- (Q) RCT: Allocation concealment
- (R) RCT: Incomplete outcome data

PNB versus no PNB for THA/TKA

23-Feb-2021

1.93 Blood transfusion | GA/NA (THA/TKA)

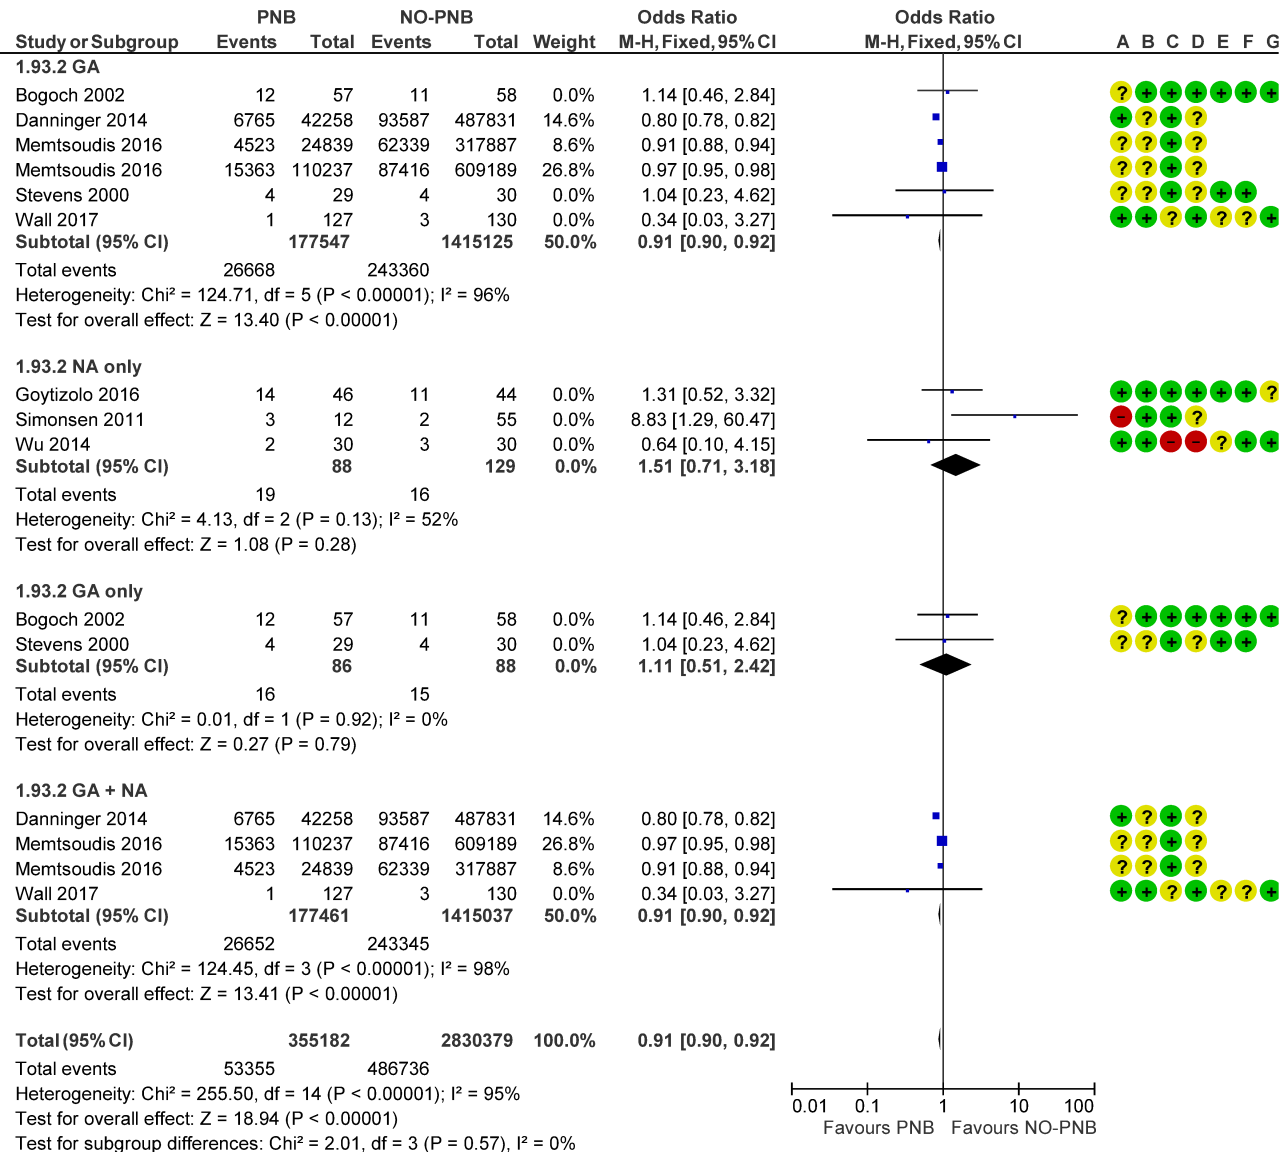

Risk of bias legend

- (A) Random sequence generation (selection bias)
- (B) Allocation concealment (selection bias)
- (C) Blinding of participants and personnel (performance bias)
- (D) Blinding of outcome assessment (detection bias)
- (E) Incomplete outcome data (attrition bias)
- (F) Selective reporting (reporting bias)
- (G) Other bias
- (H) Observational Study: Failure to develop and apply appropriate eligibility criteria
- (I) Observational Study: Flawed measurement of exposure or outcome
- (J) Observational Study: Incomplete follow-up
- (K) Observational Study: Failure to adequately control for confounding
- (L) RCT: Selective outcome reporting
- (M) RCT: Sequence Generation
- (N) RCT: Other sources of bias
- (O) RCT: Blinding of outcome assessors
- (P) RCT: Blinding of participants and personnel



**PNB versus no PNB for THA/TKA**

23-Feb-2021

- (P) RCT: Blinding of participants and personnel
- (Q) RCT: Allocation concealment
- (R) RCT: Incomplete outcome data

## PNB versus no PNB for THA/TKA

23-Feb-2021

## 1.94 Blood loss (total / intraop / postop) | TKA

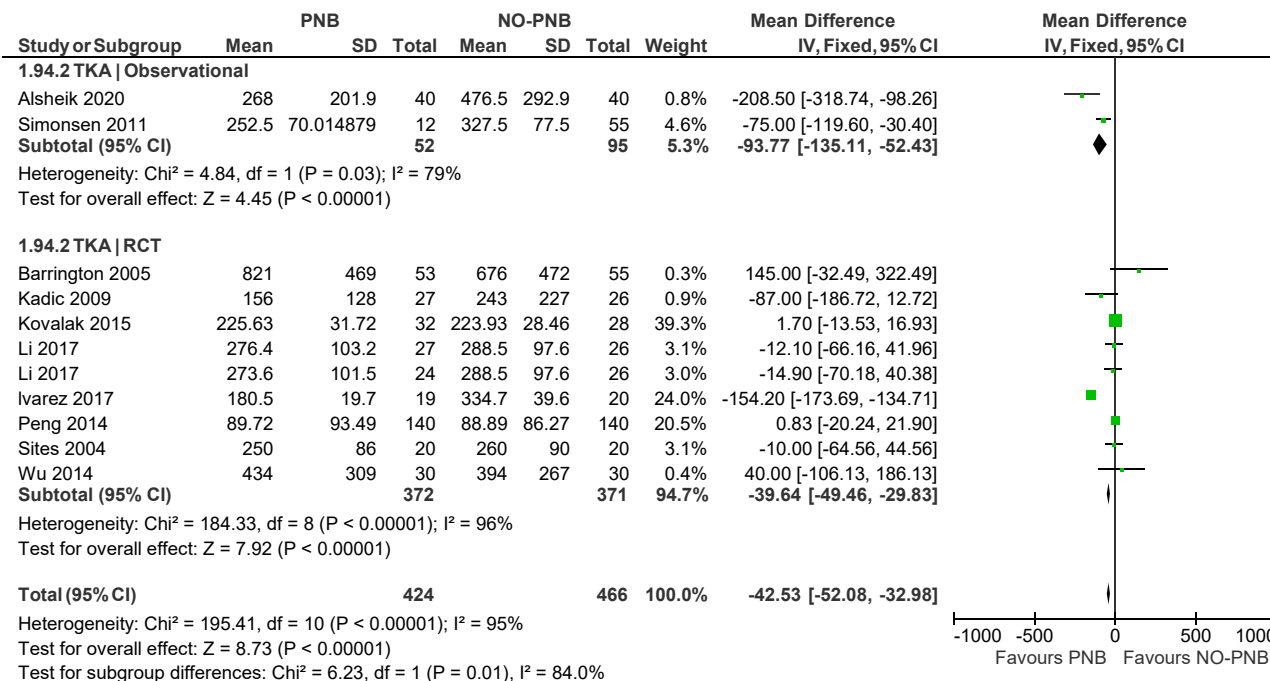Risk of bias legend

- (A) Random sequence generation (selection bias)
- (B) Allocation concealment (selection bias)
- (C) Blinding of participants and personnel (performance bias)
- (D) Blinding of outcome assessment (detection bias)
- (E) Incomplete outcome data (attrition bias)
- (F) Selective reporting (reporting bias)
- (G) Other bias
- (H) Observational Study: Failure to develop and apply appropriate eligibility criteria
- (I) Observational Study: Flawed measurement of exposure or outcome
- (J) Observational Study: Incomplete follow-up
- (K) Observational Study: Failure to adequately control for confounding
- (L) RCT: Selective outcome reporting
- (M) RCT: Sequence Generation
- (N) RCT: Other sources of bias
- (O) RCT: Blinding of outcome assessors
- (P) RCT: Blinding of participants and personnel
- (Q) RCT: Allocation concealment
- (R) RCT: Incomplete outcome data

PNB versus no PNB for THA/TKA

23-Feb-2021

1.95 Blood loss (total / intraop / postop) | THA

| Study or Subgroup                                                                                                                                                                                                                   | PNB    |       |            | NO-PNB |        |            | Weight        | Mean Difference<br>IV, Fixed, 95% CI | Mean Difference<br>IV, Fixed, 95% CI | A |
|-------------------------------------------------------------------------------------------------------------------------------------------------------------------------------------------------------------------------------------|--------|-------|------------|--------|--------|------------|---------------|--------------------------------------|--------------------------------------|---|
|                                                                                                                                                                                                                                     | Mean   | SD    | Total      | Mean   | SD     | Total      |               |                                      |                                      |   |
| <b>1.95.2 THA   Observational</b>                                                                                                                                                                                                   |        |       |            |        |        |            |               |                                      |                                      |   |
| Tetsunaga 2016                                                                                                                                                                                                                      | 252    | 168   | 30         | 212    | 219    | 32         | 2.4%          | 40.00 [-56.81, 136.81]               |                                      | ● |
| <b>Subtotal (95% CI)</b>                                                                                                                                                                                                            |        |       | <b>30</b>  |        |        | <b>32</b>  | <b>2.4%</b>   | <b>40.00 [-56.81, 136.81]</b>        |                                      | ◆ |
| Heterogeneity: Not applicable<br>Test for overall effect: Z = 0.81 (P = 0.42)                                                                                                                                                       |        |       |            |        |        |            |               |                                      |                                      |   |
| <b>1.95.2 THA   RCT</b>                                                                                                                                                                                                             |        |       |            |        |        |            |               |                                      |                                      |   |
| Aksoy 2014                                                                                                                                                                                                                          | 329.57 | 53.66 | 35         | 283.14 | 68.66  | 35         | 26.6%         | 46.43 [17.56, 75.30]                 |                                      | ● |
| Kearns 2016                                                                                                                                                                                                                         | 300    | 50    | 54         | 300    | 50     | 54         | 62.4%         | 0.00 [-18.86, 18.86]                 |                                      | ● |
| Kendrii 2017                                                                                                                                                                                                                        | 800    | 280.3 | 15         | 756.66 | 274.42 | 15         | 0.6%          | 43.34 [-155.17, 241.85]              |                                      | ● |
| Kratz 2015                                                                                                                                                                                                                          | 487    | 244   | 26         | 442    | 225    | 26         | 1.4%          | 45.00 [-82.58, 172.58]               |                                      | ● |
| Nishio 2014                                                                                                                                                                                                                         | 606.3  | 145.7 | 10         | 578.7  | 61.9   | 9          | 2.3%          | 27.60 [-71.35, 126.55]               |                                      | ● |
| Siddiqui 2007                                                                                                                                                                                                                       | 1,031  | 569   | 17         | 707    | 360    | 17         | 0.2%          | 324.00 [3.93, 644.07]                |                                      | ● |
| Stevens 2000                                                                                                                                                                                                                        | 170    | 125   | 29         | 310    | 204    | 30         | 3.0%          | -140.00 [-226.02, -53.98]            |                                      | ● |
| Twyman 1990                                                                                                                                                                                                                         | 402    | 185   | 10         | 457    | 111    | 10         | 1.2%          | -55.00 [-188.72, 78.72]              |                                      | ● |
| <b>Subtotal (95% CI)</b>                                                                                                                                                                                                            |        |       | <b>196</b> |        |        | <b>196</b> | <b>97.6%</b>  | <b>9.90 [-5.18, 24.97]</b>           |                                      | ◆ |
| Heterogeneity: Chi <sup>2</sup> = 24.00, df = 7 (P = 0.001); I <sup>2</sup> = 71%<br>Test for overall effect: Z = 1.29 (P = 0.20)                                                                                                   |        |       |            |        |        |            |               |                                      |                                      |   |
| <b>Total (95% CI)</b>                                                                                                                                                                                                               |        |       | <b>226</b> |        |        | <b>228</b> | <b>100.0%</b> | <b>10.61 [-4.28, 25.50]</b>          |                                      | ◆ |
| Heterogeneity: Chi <sup>2</sup> = 24.37, df = 8 (P = 0.002); I <sup>2</sup> = 67%<br>Test for overall effect: Z = 1.40 (P = 0.16)<br>Test for subgroup differences: Chi <sup>2</sup> = 0.36, df = 1 (P = 0.55), I <sup>2</sup> = 0% |        |       |            |        |        |            |               |                                      |                                      |   |

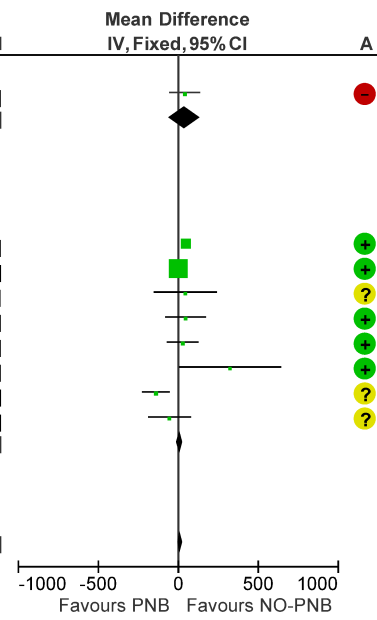

Risk of bias legend

- (A) Random sequence generation (selection bias)
- (B) Allocation concealment (selection bias)
- (C) Blinding of participants and personnel (performance bias)
- (D) Blinding of outcome assessment (detection bias)
- (E) Incomplete outcome data (attrition bias)
- (F) Selective reporting (reporting bias)
- (G) Other bias
- (H) Observational Study: Failure to develop and apply appropriate eligibility criteria
- (I) Observational Study: Flawed measurement of exposure or outcome
- (J) Observational Study: Incomplete follow-up
- (K) Observational Study: Failure to adequately control for confounding
- (L) RCT: Selective outcome reporting
- (M) RCT: Sequence Generation
- (N) RCT: Other sources of bias
- (O) RCT: Blinding of outcome assessors
- (P) RCT: Blinding of participants and personnel
- (Q) RCT: Allocation concealment
- (R) RCT: Incomplete outcome data

PNB versus no PNB for THA/TKA

23-Feb-2021

1.96 Blood loss (total / intraop / postop) | GA/NA (THA/TKA)

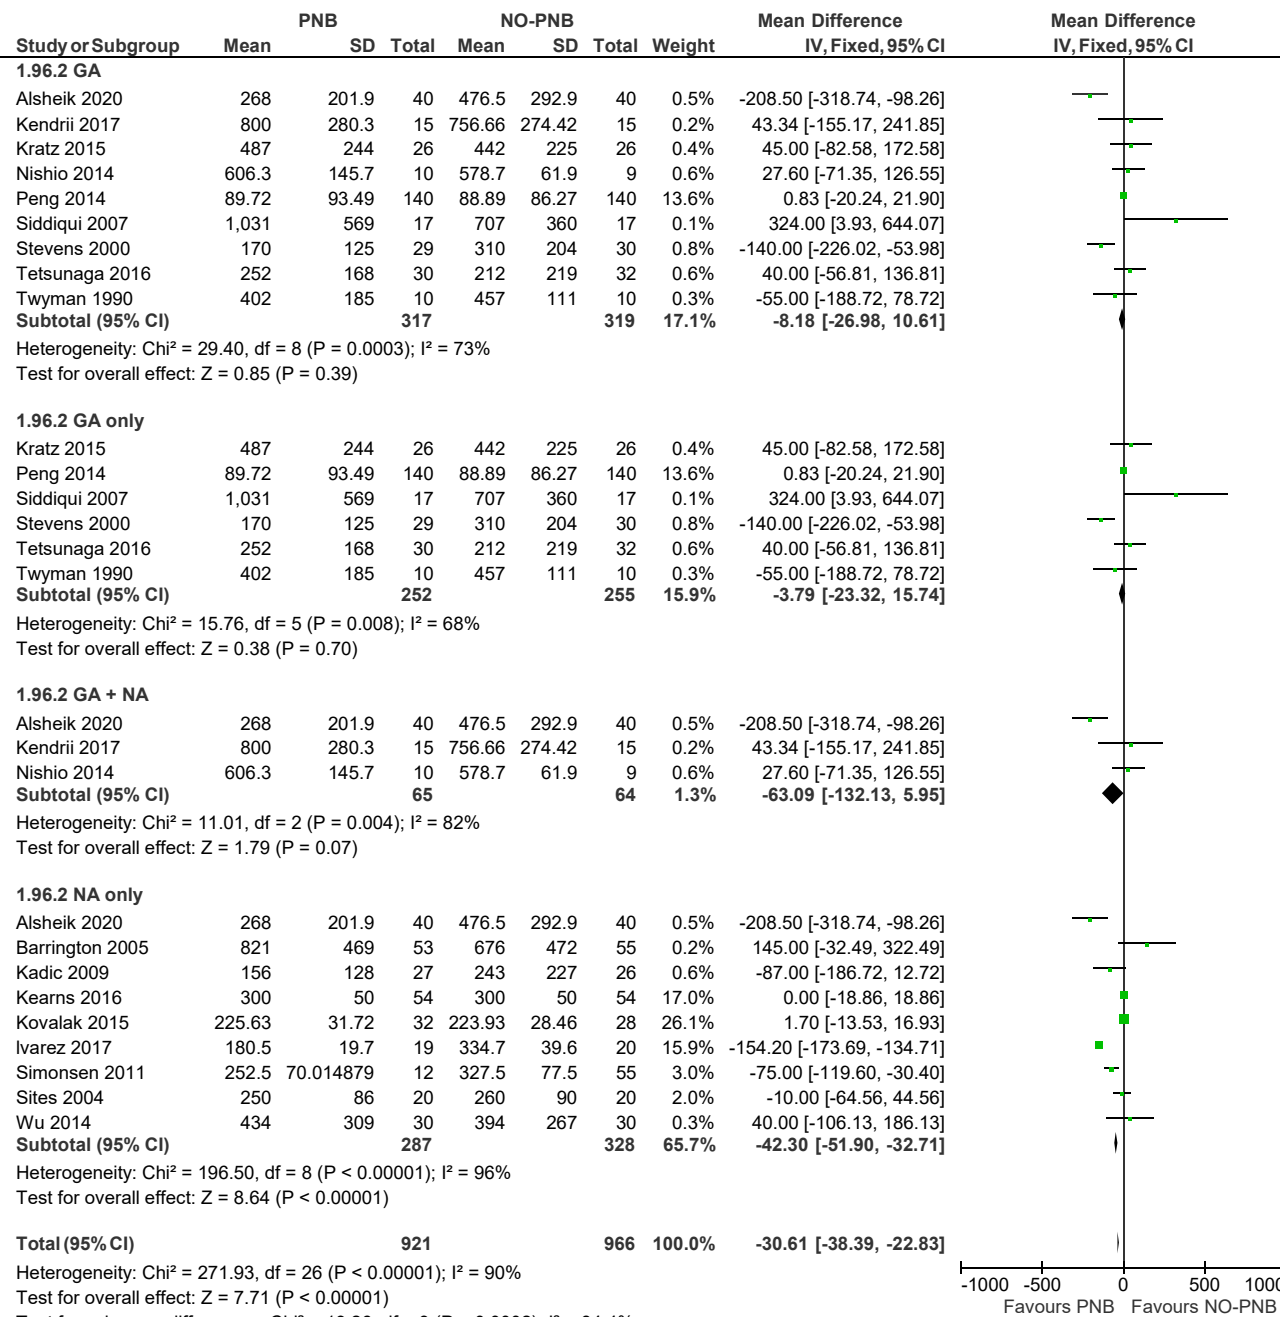

Risk of bias legend

- (A) Random sequence generation (selection bias)
- (B) Allocation concealment (selection bias)
- (C) Blinding of participants and personnel (performance bias)
- (D) Blinding of outcome assessment (detection bias)
- (E) Incomplete outcome data (attrition bias)
- (F) Selective reporting (reporting bias)
- (G) Other bias
- (H) Observational Study: Failure to develop and apply appropriate eligibility criteria
- (I) Observational Study: Flawed measurement of exposure or outcome

---

**PNB versus no PNB for THA/TKA**

23-Feb-2021

- (I) Observational Study: Flawed measurement of exposure or outcome
- (J) Observational Study: Incomplete follow-up
- (K) Observational Study: Failure to adequately control for confounding
- (L) RCT: Selective outcome reporting
- (M) RCT: Sequence Generation
- (N) RCT: Other sources of bias
- (O) RCT: Blinding of outcome assessors
- (P) RCT: Blinding of participants and personnel
- (Q) RCT: Allocation concealment
- (R) RCT: Incomplete outcome data

## PNB versus no PNB for THA/TKA

23-Feb-2021

## 1.97 Blood loss (total / intraop / postop) | Total

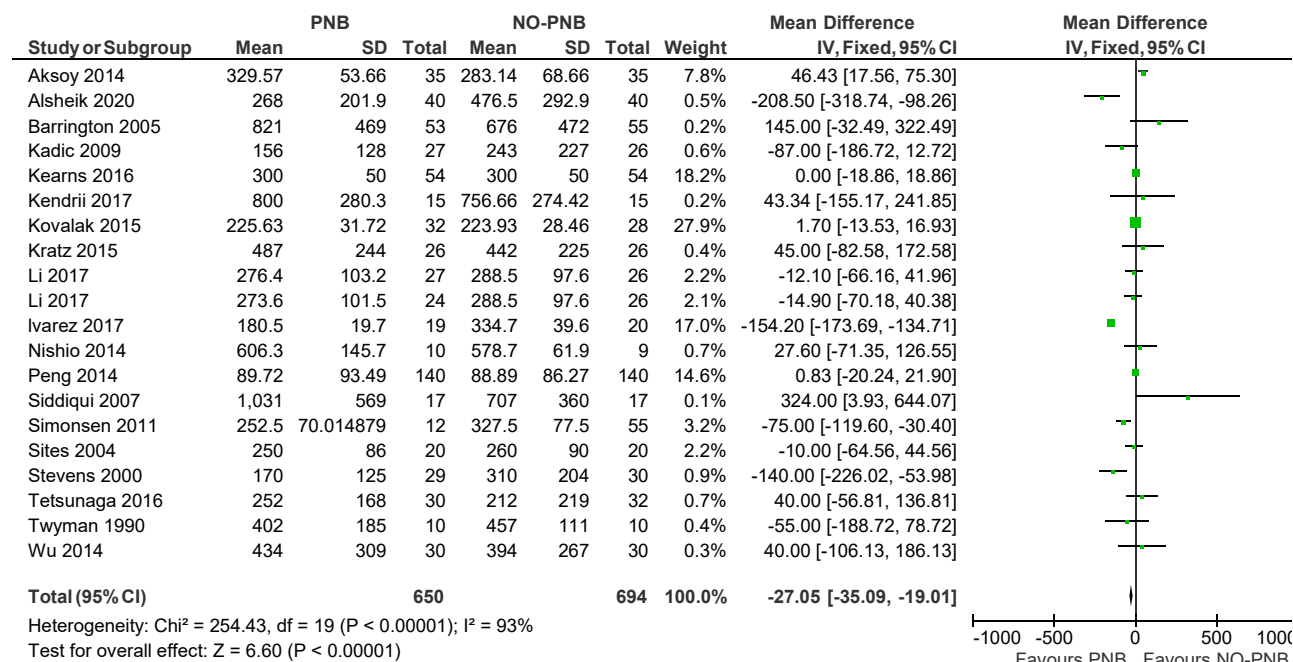

## Risk of bias legend

- (A) Random sequence generation (selection bias)
- (B) Allocation concealment (selection bias)
- (C) Blinding of participants and personnel (performance bias)
- (D) Blinding of outcome assessment (detection bias)
- (E) Incomplete outcome data (attrition bias)
- (F) Selective reporting (reporting bias)
- (G) Other bias
- (H) Observational Study: Failure to develop and apply appropriate eligibility criteria
- (I) Observational Study: Flawed measurement of exposure or outcome
- (J) Observational Study: Incomplete follow-up
- (K) Observational Study: Failure to adequately control for confounding
- (L) RCT: Selective outcome reporting
- (M) RCT: Sequence Generation
- (N) RCT: Other sources of bias
- (O) RCT: Blinding of outcome assessors
- (P) RCT: Blinding of participants and personnel
- (Q) RCT: Allocation concealment
- (R) RCT: Incomplete outcome data

PNB versus no PNB for THA/TKA

23-Feb-2021

1.98 Length of hospital stay (LOS) | THA

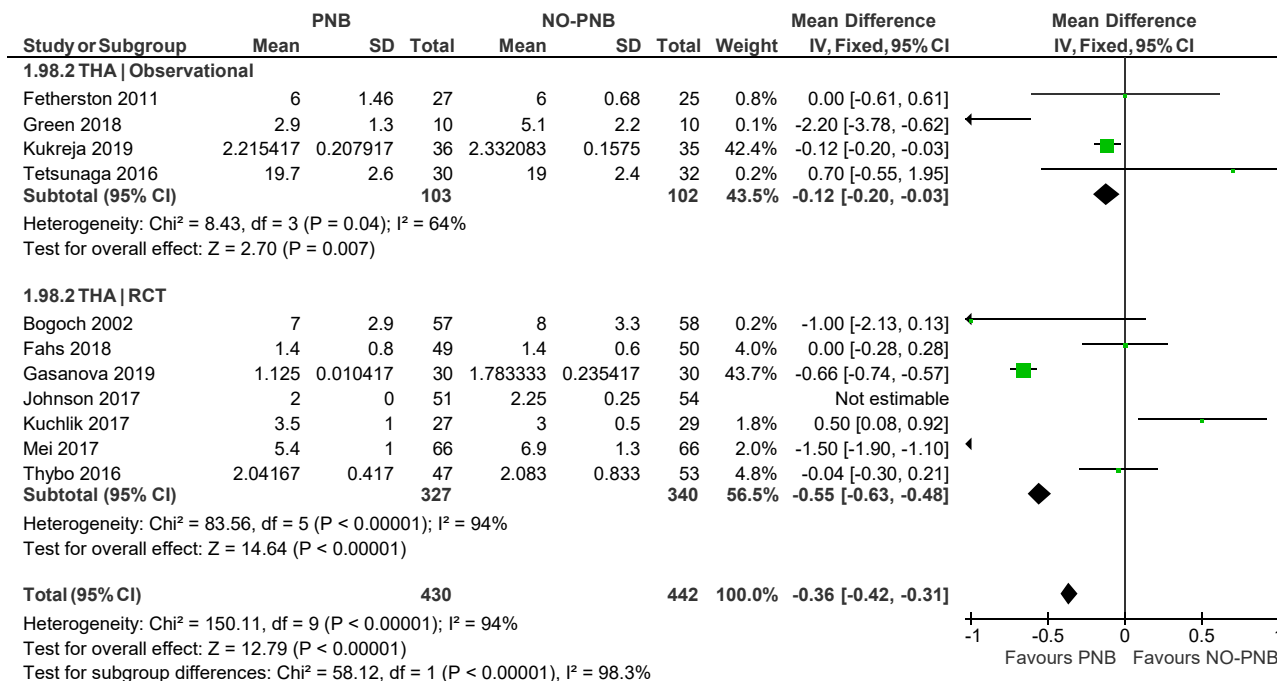

Risk of bias legend

- (A) Random sequence generation (selection bias)
- (B) Allocation concealment (selection bias)
- (C) Blinding of participants and personnel (performance bias)
- (D) Blinding of outcome assessment (detection bias)
- (E) Incomplete outcome data (attrition bias)
- (F) Selective reporting (reporting bias)
- (G) Other bias
- (H) Observational Study: Failure to develop and apply appropriate eligibility criteria
- (I) Observational Study: Flawed measurement of exposure or outcome
- (J) Observational Study: Incomplete follow-up
- (K) Observational Study: Failure to adequately control for confounding
- (L) RCT: Selective outcome reporting
- (M) RCT: Sequence Generation
- (N) RCT: Other sources of bias
- (O) RCT: Blinding of outcome assessors
- (P) RCT: Blinding of participants and personnel
- (Q) RCT: Allocation concealment
- (R) RCT: Incomplete outcome data

PNB versus no PNB for THA/TKA

23-Feb-2021

1.99 Length of hospital stay (LOS) | Total

| Study or Subgroup | PNB      |            |       | NO-PNB   |            |       | Weight | Mean Difference<br>IV, Fixed, 95% CI | Mean Difference<br>IV, Fixed, 95% CI |
|-------------------|----------|------------|-------|----------|------------|-------|--------|--------------------------------------|--------------------------------------|
|                   | Mean     | SD         | Total | Mean     | SD         | Total |        |                                      |                                      |
| Amundson 2017     | 2        | 0.1666     | 50    | 2        | 0.1666     | 107   | 14.2%  | 0.00 [-0.06, 0.06]                   |                                      |
| Andersen 2012     | 3.4      | 0.65       | 20    | 3.3      | 0.85       | 20    | 0.2%   | 0.10 [-0.37, 0.57]                   |                                      |
| Angers 2019       | 6.2      | 2.1        | 45    | 6.1      | 3          | 45    | 0.0%   | 0.10 [-0.97, 1.17]                   |                                      |
| Antoni 2014       | 8.8      | 3.5        | 49    | 6.1      | 3.4        | 49    | 0.0%   | 2.70 [1.33, 4.07]                    |                                      |
| Ashraf 2013       | 5.7      | 1.3        | 21    | 5.4      | 1.2        | 19    | 0.1%   | 0.30 [-0.47, 1.07]                   |                                      |
| Barrington 2005   | 5.3      | 1.1        | 53    | 5.4      | 1.1        | 55    | 0.3%   | -0.10 [-0.51, 0.31]                  |                                      |
| Beaupre 2012      | 4.25     | 0.25       | 19    | 3.5      | 0.25       | 20    | 1.8%   | 0.75 [0.59, 0.91]                    |                                      |
| Biswas 2018       | 3        | 0          | 68    | 3        | 0          | 62    |        | Not estimable                        |                                      |
| Bogoch 2002       | 7        | 2.9        | 57    | 8        | 3.3        | 58    | 0.0%   | -1.00 [-2.13, 0.13]                  |                                      |
| Campbell 2008     | 9        | 4          | 26    | 8.75     | 3.75       | 30    | 0.0%   | 0.25 [-1.79, 2.29]                   |                                      |
| Chan 2013         | 5.5      | 1.6        | 65    | 5.4      | 1.4        | 66    | 0.2%   | 0.10 [-0.42, 0.62]                   |                                      |
| Chan 2013         | 5.9      | 1.9        | 69    | 5.4      | 1.4        | 66    | 0.1%   | 0.50 [-0.06, 1.06]                   |                                      |
| Chan 2014         | 5.5      | 1.6        | 65    | 5.4      | 1.4        | 66    | 0.2%   | 0.10 [-0.42, 0.62]                   |                                      |
| Chan 2014         | 5.9      | 1.9        | 69    | 5.4      | 1.4        | 66    | 0.1%   | 0.50 [-0.06, 1.06]                   |                                      |
| Chaumeron 2013    | 6.8      | 2.6        | 30    | 6.6      | 2.1        | 29    | 0.0%   | 0.20 [-1.00, 1.40]                   |                                      |
| Cien 2015         | 2        | 0.7        | 65    | 1.6      | 0.7        | 57    | 0.7%   | 0.40 [0.15, 0.65]                    |                                      |
| DeRuyter 2006     | 3.6      | 0.6        | 24    | 4.2      | 1          | 26    | 0.2%   | -0.60 [-1.05, -0.15]                 |                                      |
| Fahs 2018         | 1.4      | 0.8        | 49    | 1.4      | 0.6        | 50    | 0.6%   | 0.00 [-0.28, 0.28]                   |                                      |
| Fan 2016          | 18.6     | 4.7        | 78    | 17.3     | 3.7        | 79    | 0.0%   | 1.30 [-0.02, 2.62]                   |                                      |
| Fenten 2018       | 3.2      | 1.1        | 40    | 3        | 0.9        | 40    | 0.2%   | 0.20 [-0.24, 0.64]                   |                                      |
| Fetherston 2011   | 6        | 1.46       | 27    | 6        | 0.68       | 25    | 0.1%   | 0.00 [-0.61, 0.61]                   |                                      |
| Gasanova 2019     | 1.125    | 0.010417   | 30    | 1.783333 | 0.235417   | 30    | 6.3%   | -0.66 [-0.74, -0.57]                 |                                      |
| Goytizolo 2020    | 1.075    | 0.2177     | 55    | 1.1      | 0.2427     | 56    | 6.1%   | -0.03 [-0.11, 0.06]                  |                                      |
| Green 2018        | 2.9      | 1.3        | 10    | 5.1      | 2.2        | 10    | 0.0%   | -2.20 [-3.78, -0.62]                 |                                      |
| Grosso 2018       | 2.5      | 2.1        | 51    | 2.5      | 1.2        | 51    | 0.1%   | 0.00 [-0.66, 0.66]                   |                                      |
| Gwam 2018         | 1.98     | 0.16       | 65    | 2.44     | 0.25       | 45    | 6.5%   | -0.46 [-0.54, -0.38]                 |                                      |
| Henson 2019       | 2.97     | 1.08       | 71    | 2.63     | 0.68       | 73    | 0.5%   | 0.34 [0.04, 0.64]                    |                                      |
| Horn 2015         | 1.9      | 0.6        | 16    | 1.5      | 0.6        | 16    | 0.3%   | 0.40 [-0.02, 0.82]                   |                                      |
| Johnson 2017      | 2        | 0          | 51    | 2.25     | 0.25       | 54    |        | Not estimable                        |                                      |
| Kampitak 2018     | 4        | 0          | 29    | 4.11     | 0.31       | 28    |        | Not estimable                        |                                      |
| Kardash 2007      | 6.7      | 1.34164079 | 20    | 6.1      | 1.34164079 | 20    | 0.1%   | 0.60 [-0.23, 1.43]                   |                                      |
| Kardash 2007      | 6.2      | 1.30766968 | 19    | 6.1      | 1.34164079 | 20    | 0.1%   | 0.10 [-0.73, 0.93]                   |                                      |
| Kayupov 2018      | 2.21     | 1.58       | 47    | 2.46     | 0.98       | 44    | 0.2%   | -0.25 [-0.79, 0.29]                  |                                      |
| Kayupov 2018      | 2.14     | 0.68       | 41    | 2.46     | 0.98       | 44    | 0.4%   | -0.32 [-0.68, 0.04]                  |                                      |
| Kinjo 2012        | 5.7      | 6.4        | 29    | 5        | 1.9        | 52    | 0.0%   | 0.70 [-1.69, 3.09]                   |                                      |
| Kirkness 2017     | 3.6      | 1.6        | 134   | 3.1      | 1.7        | 134   | 0.3%   | 0.50 [0.10, 0.90]                    |                                      |
| Kovalak 2015      | 4.81     | 0.69       | 32    | 4.61     | 0.74       | 28    | 0.3%   | 0.20 [-0.16, 0.56]                   |                                      |
| Kuchlik 2017      | 3.5      | 1          | 27    | 3        | 0.5        | 29    | 0.3%   | 0.50 [0.08, 0.92]                    |                                      |
| Kukreja 2019      | 2.215417 | 0.207917   | 36    | 2.332083 | 0.1575     | 35    | 6.1%   | -0.12 [-0.20, -0.03]                 |                                      |
| Kulkarni 2019     | 4.8      | 1.43       | 50    | 5.1      | 1.24       | 50    | 0.2%   | -0.30 [-0.82, 0.22]                  |                                      |
| Lee 2012          | 17.3     | 4          | 20    | 17.7     | 5.1        | 20    | 0.0%   | -0.40 [-3.24, 2.44]                  |                                      |
| Leung 2018        | 2.67     | 1.1        | 38    | 2.42     | 0.68       | 32    | 0.3%   | 0.25 [-0.17, 0.67]                   |                                      |
| Li 2017           | 5.2      | 1          | 27    | 3.6      | 0.8        | 26    | 0.2%   | 1.60 [1.11, 2.09]                    |                                      |
| Li 2017           | 4.9      | 0.8        | 24    | 3.6      | 0.8        | 26    | 0.2%   | 1.30 [0.86, 1.74]                    |                                      |
| Liu 2015          | 3.61     | 1.02298463 | 1329  | 3.76     | 1.01554645 | 439   | 3.7%   | -0.15 [-0.26, -0.04]                 |                                      |
| Lu 2017           | 4.5      | 1.1        | 28    | 5        | 2.2        | 29    | 0.1%   | -0.50 [-1.40, 0.40]                  |                                      |
| Mclsaac 2017      | 4.7      | 3.9        | 38557 | 4.8      | 4.1        | 38557 | 14.0%  | -0.10 [-0.16, -0.04]                 |                                      |
| Mei 2017          | 5.4      | 1          | 66    | 6.9      | 1.3        | 66    | 0.3%   | -1.50 [-1.90, -1.10]                 |                                      |
| Ng 2001           | 8.8      | 3.4        | 12    | 8.8      | 2.9        | 12    | 0.0%   | 0.00 [-2.53, 2.53]                   |                                      |
| Ng 2001           | 9.5      | 3.4        | 12    | 8.8      | 2.9        | 12    | 0.0%   | 0.70 [-1.83, 3.23]                   |                                      |
| Ng 2001           | 9.3      | 3          | 12    | 8.8      | 2.9        | 12    | 0.0%   | 0.50 [-1.86, 2.86]                   |                                      |
| Pope 2015         | 2.8      | 1          | 267   | 2.9      | 1.1        | 27    | 0.2%   | -0.10 [-0.53, 0.33]                  |                                      |
| Pope 2015         | 2.8      | 0.9        | 77    | 2.9      | 1.1        | 27    | 0.2%   | -0.10 [-0.56, 0.36]                  |                                      |
| Pope 2015         | 3.1      | 1.2        | 37    | 2.8      | 0.8        | 17    | 0.2%   | 0.30 [-0.24, 0.84]                   |                                      |
| Pope 2015         | 2.8      | 1          | 267   | 3.3      | 1          | 18    | 0.2%   | -0.50 [-0.98, -0.02]                 |                                      |
| Pope 2015         | 3.1      | 1.2        | 37    | 2.9      | 1.1        | 27    | 0.1%   | 0.20 [-0.37, 0.77]                   |                                      |
| Pope 2015         | 2.8      | 1          | 267   | 2.8      | 0.8        | 17    | 0.3%   | 0.00 [-0.40, 0.40]                   |                                      |
| Pope 2015         | 3.1      | 1.2        | 37    | 3.3      | 1          | 18    | 0.1%   | -0.20 [-0.80, 0.40]                  |                                      |
| Pope 2015         | 2.8      | 0.9        | 77    | 2.8      | 0.8        | 17    | 0.2%   | 0.00 [-0.43, 0.43]                   |                                      |
| Pope 2015         | 2.8      | 0.9        | 77    | 3.3      | 1          | 18    | 0.2%   | -0.50 [-1.00, 0.00]                  |                                      |
| Pope 2015         | 1.45     | 0.704167   | 624   | 1.691667 | 0.725      | 60    | 1.4%   | -0.24 [-0.42, -0.06]                 |                                      |



## PNB versus no PNB for THA/TKA

23-Feb-2021

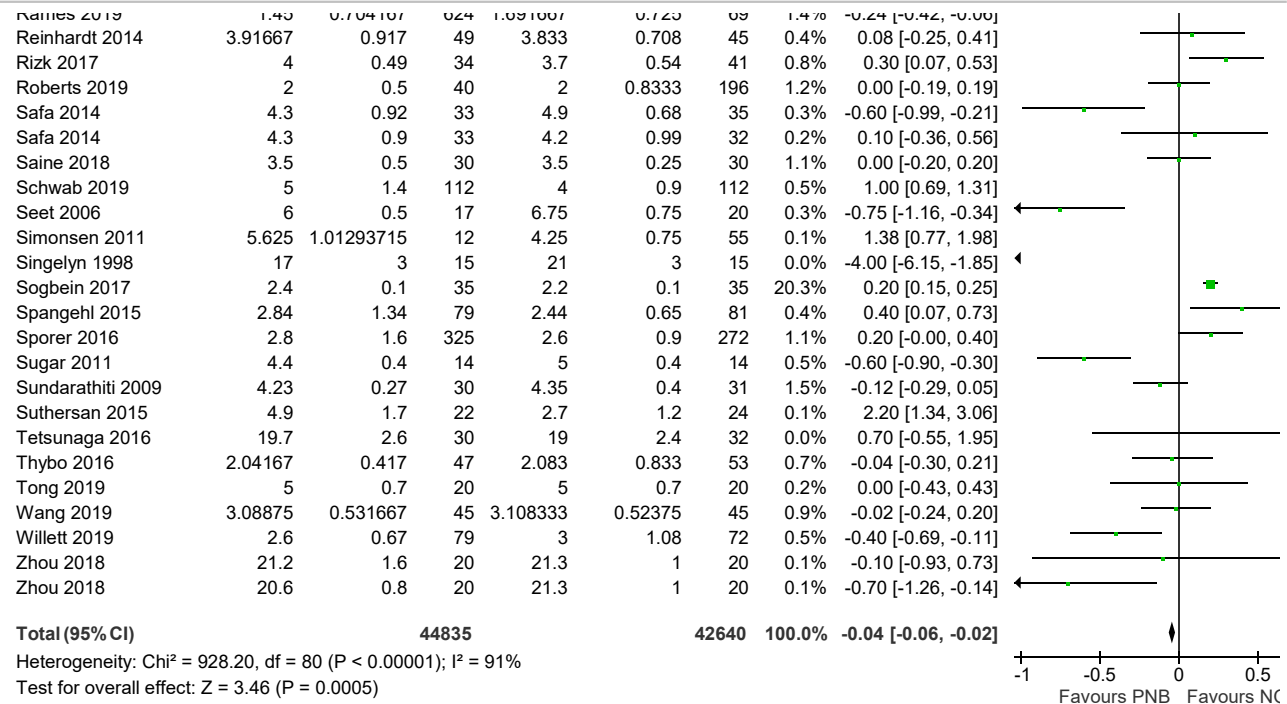

## Risk of bias legend

- (A) Random sequence generation (selection bias)
- (B) Allocation concealment (selection bias)
- (C) Blinding of participants and personnel (performance bias)
- (D) Blinding of outcome assessment (detection bias)
- (E) Incomplete outcome data (attrition bias)
- (F) Selective reporting (reporting bias)
- (G) Other bias
- (H) Observational Study: Failure to develop and apply appropriate eligibility criteria
- (I) Observational Study: Flawed measurement of exposure or outcome
- (J) Observational Study: Incomplete follow-up
- (K) Observational Study: Failure to adequately control for confounding
- (L) RCT: Selective outcome reporting
- (M) RCT: Sequence Generation
- (N) RCT: Other sources of bias
- (O) RCT: Blinding of outcome assessors
- (P) RCT: Blinding of participants and personnel
- (Q) RCT: Allocation concealment
- (R) RCT: Incomplete outcome data

PNB versus no PNB for THA/TKA

23-Feb-2021

1.100 Length of hospital stay (LOS) | TKA

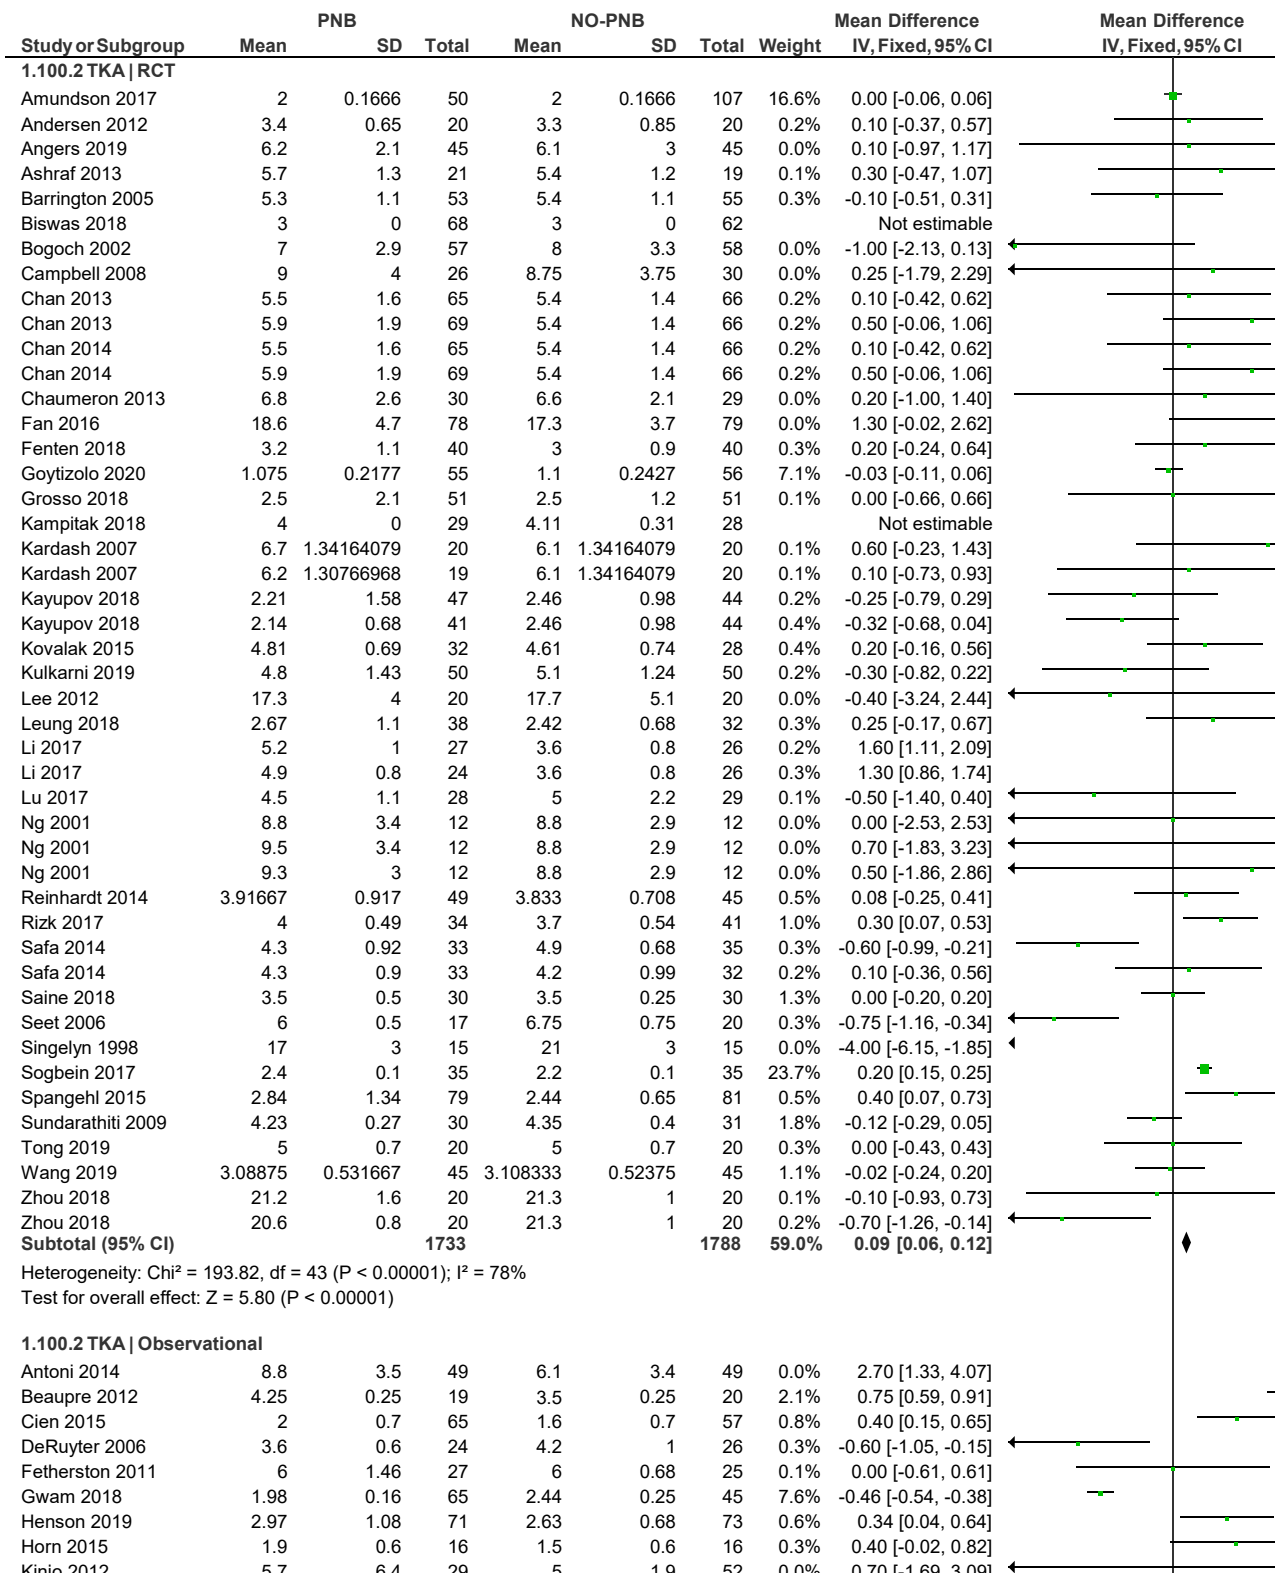

PNB versus no PNB for THA/TKA

23-Feb-2021

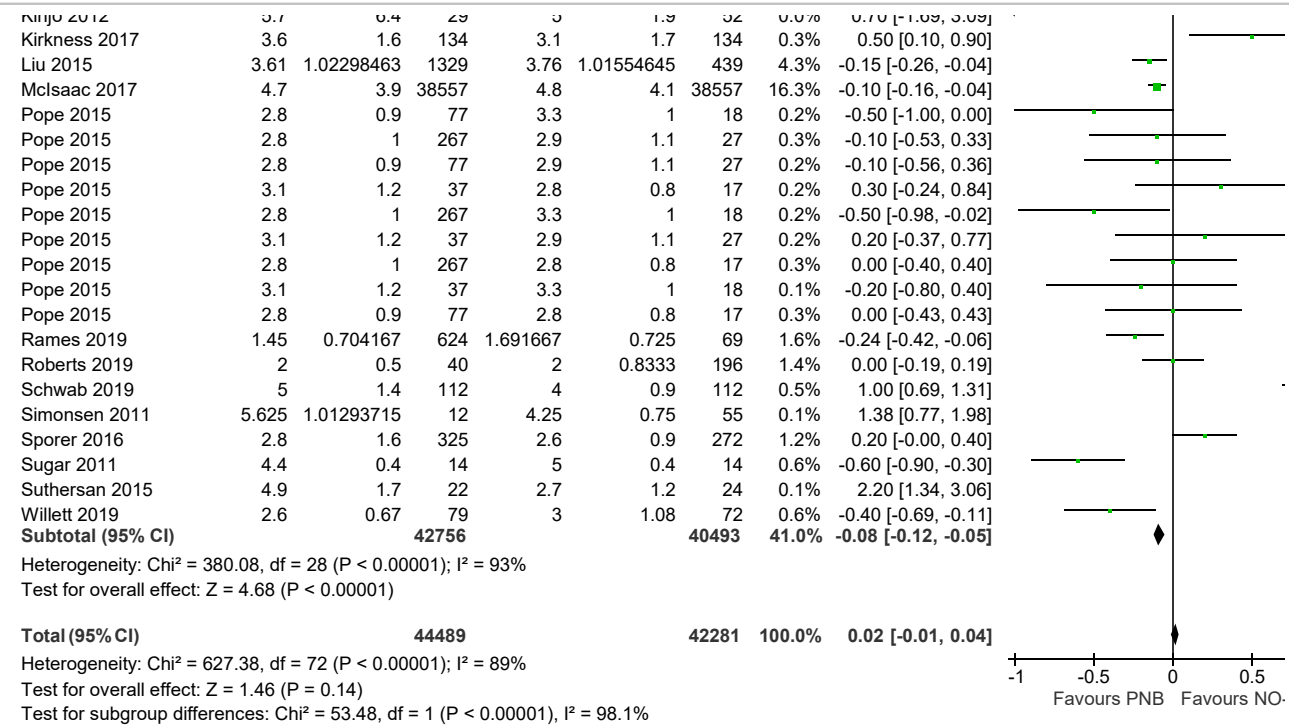

Risk of bias legend

- (A) Random sequence generation (selection bias)
- (B) Allocation concealment (selection bias)
- (C) Blinding of participants and personnel (performance bias)
- (D) Blinding of outcome assessment (detection bias)
- (E) Incomplete outcome data (attrition bias)
- (F) Selective reporting (reporting bias)
- (G) Other bias
- (H) Observational Study: Failure to develop and apply appropriate eligibility criteria
- (I) Observational Study: Flawed measurement of exposure or outcome
- (J) Observational Study: Incomplete follow-up
- (K) Observational Study: Failure to adequately control for confounding
- (L) RCT: Selective outcome reporting
- (M) RCT: Sequence Generation
- (N) RCT: Other sources of bias
- (O) RCT: Blinding of outcome assessors
- (P) RCT: Blinding of participants and personnel
- (Q) RCT: Allocation concealment
- (R) RCT: Incomplete outcome data

## PNB versus no PNB for THA/TKA

23-Feb-2021

## 1.101 Length of hospital stay (LOS) | GA/NA (THA/TKA)

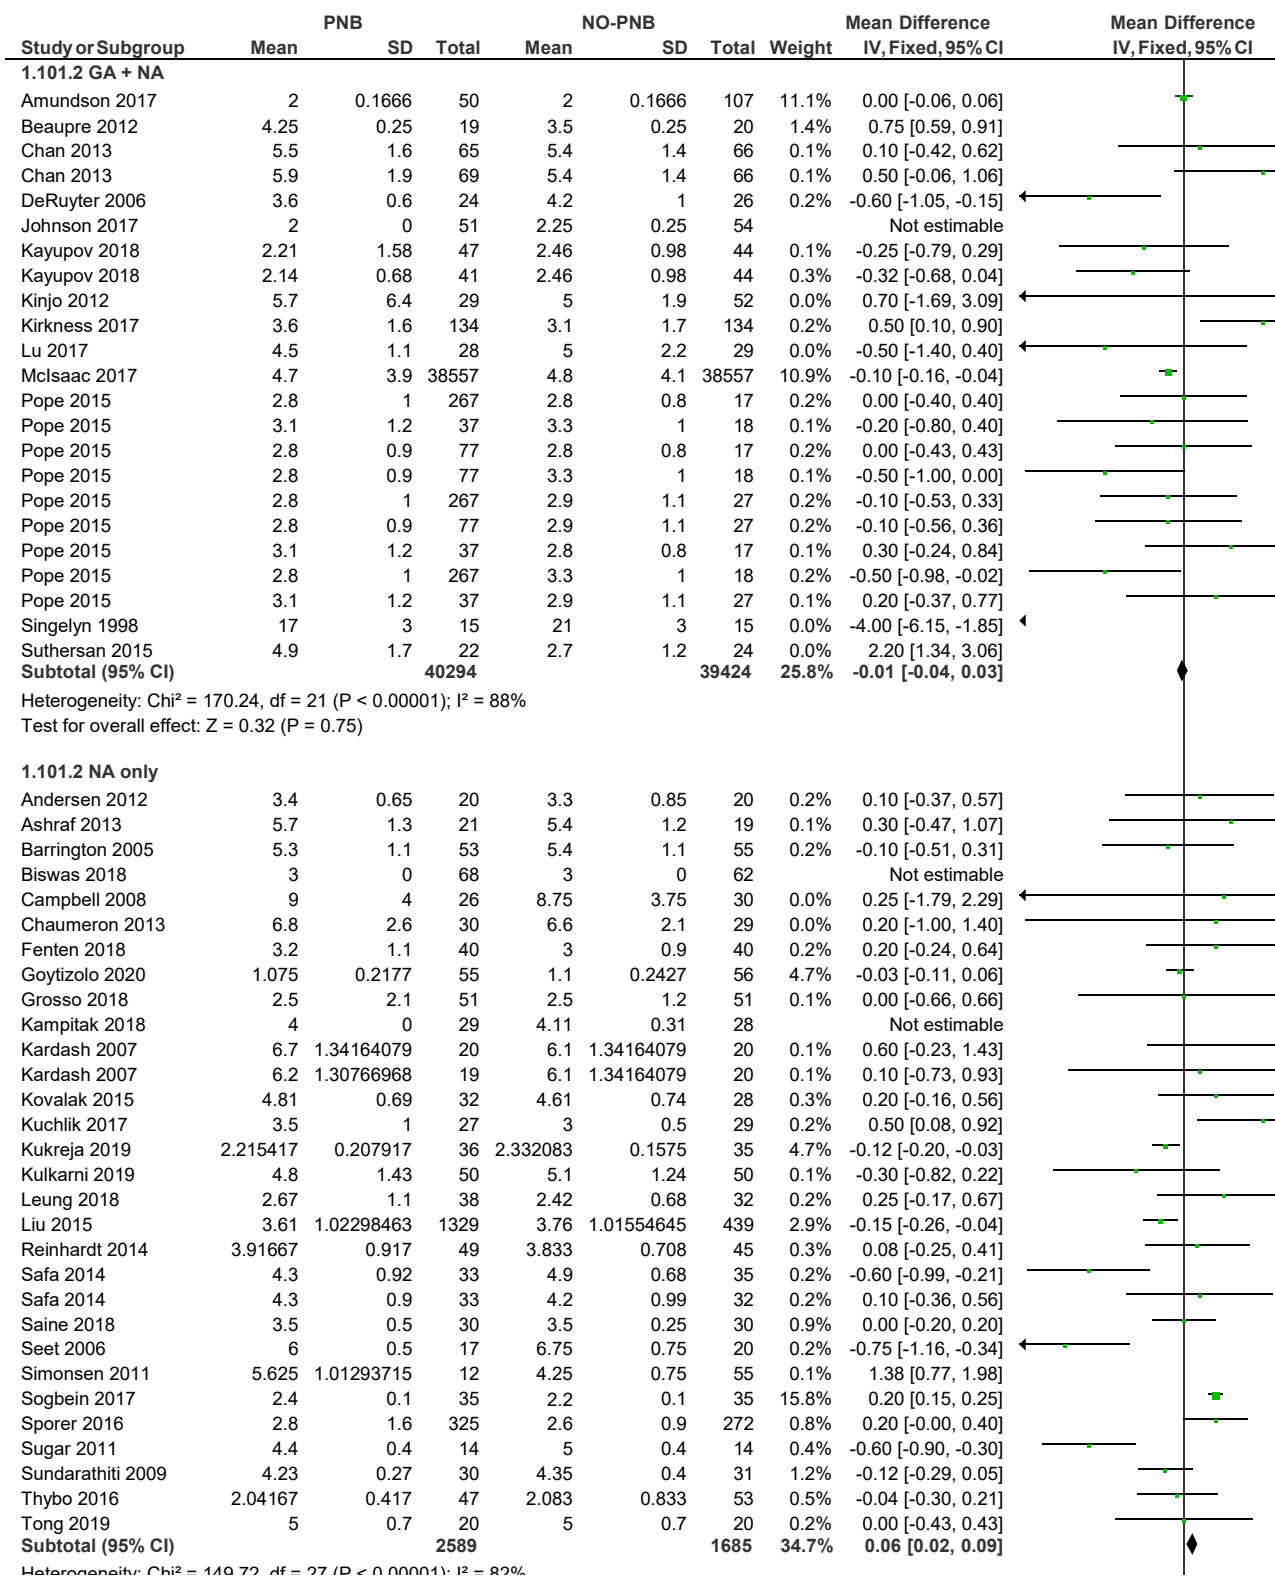

Review Manager 5.4.1

118

PNB versus no PNB for THA/TKA

23-Feb-2021

heterogeneity: Chi<sup>2</sup> = 149.72, df = 21 (P < 0.00001), I<sup>2</sup> = 92.70  
 Test for overall effect: Z = 3.48 (P = 0.0005)

1.101.2 GA

|                          |       |          |              |          |          |              |              |                             |  |
|--------------------------|-------|----------|--------------|----------|----------|--------------|--------------|-----------------------------|--|
| Amundson 2017            | 2     | 0.1666   | 50           | 2        | 0.1666   | 107          | 11.1%        | 0.00 [-0.06, 0.06]          |  |
| Angers 2019              | 6.2   | 2.1      | 45           | 6.1      | 3        | 45           | 0.0%         | 0.10 [-0.97, 1.17]          |  |
| Antoni 2014              | 8.8   | 3.5      | 49           | 6.1      | 3.4      | 49           | 0.0%         | 2.70 [1.33, 4.07]           |  |
| Beaupre 2012             | 4.25  | 0.25     | 19           | 3.5      | 0.25     | 20           | 1.4%         | 0.75 [0.59, 0.91]           |  |
| Bogoch 2002              | 7     | 2.9      | 57           | 8        | 3.3      | 58           | 0.0%         | -1.00 [-2.13, 0.13]         |  |
| Chan 2013                | 5.5   | 1.6      | 65           | 5.4      | 1.4      | 66           | 0.1%         | 0.10 [-0.42, 0.62]          |  |
| Chan 2013                | 5.9   | 1.9      | 69           | 5.4      | 1.4      | 66           | 0.1%         | 0.50 [-0.06, 1.06]          |  |
| DeRuyter 2006            | 3.6   | 0.6      | 24           | 4.2      | 1        | 26           | 0.2%         | -0.60 [-1.05, -0.15]        |  |
| Fahs 2018                | 1.4   | 0.8      | 49           | 1.4      | 0.6      | 50           | 0.4%         | 0.00 [-0.28, 0.28]          |  |
| Fan 2016                 | 18.6  | 4.7      | 78           | 17.3     | 3.7      | 79           | 0.0%         | 1.30 [-0.02, 2.62]          |  |
| Gasanova 2019            | 1.125 | 0.010417 | 30           | 1.783333 | 0.235417 | 30           | 4.9%         | -0.66 [-0.74, -0.57]        |  |
| Green 2018               | 2.9   | 1.3      | 10           | 5.1      | 2.2      | 10           | 0.0%         | -2.20 [-3.78, -0.62]        |  |
| Johnson 2017             | 2     | 0        | 51           | 2.25     | 0.25     | 54           |              | Not estimable               |  |
| Kayupov 2018             | 2.21  | 1.58     | 47           | 2.46     | 0.98     | 44           | 0.1%         | -0.25 [-0.79, 0.29]         |  |
| Kayupov 2018             | 2.14  | 0.68     | 41           | 2.46     | 0.98     | 44           | 0.3%         | -0.32 [-0.68, 0.04]         |  |
| Kinjo 2012               | 5.7   | 6.4      | 29           | 5        | 1.9      | 52           | 0.0%         | 0.70 [-1.69, 3.09]          |  |
| Kirkness 2017            | 3.6   | 1.6      | 134          | 3.1      | 1.7      | 134          | 0.2%         | 0.50 [0.10, 0.90]           |  |
| Lee 2012                 | 17.3  | 4        | 20           | 17.7     | 5.1      | 20           | 0.0%         | -0.40 [-3.24, 2.44]         |  |
| Lu 2017                  | 4.5   | 1.1      | 28           | 5        | 2.2      | 29           | 0.0%         | -0.50 [-1.40, 0.40]         |  |
| Mclsaac 2017             | 4.7   | 3.9      | 38557        | 4.8      | 4.1      | 38557        | 10.9%        | -0.10 [-0.16, -0.04]        |  |
| Mei 2017                 | 5.4   | 1        | 66           | 6.9      | 1.3      | 66           | 0.2%         | -1.50 [-1.90, -1.10]        |  |
| Ng 2001                  | 8.8   | 3.4      | 12           | 8.8      | 2.9      | 12           | 0.0%         | 0.00 [-2.53, 2.53]          |  |
| Ng 2001                  | 9.5   | 3.4      | 12           | 8.8      | 2.9      | 12           | 0.0%         | 0.70 [-1.83, 3.23]          |  |
| Ng 2001                  | 9.3   | 3        | 12           | 8.8      | 2.9      | 12           | 0.0%         | 0.50 [-1.86, 2.86]          |  |
| Pope 2015                | 2.8   | 1        | 267          | 2.9      | 1.1      | 27           | 0.2%         | -0.10 [-0.53, 0.33]         |  |
| Pope 2015                | 2.8   | 0.9      | 77           | 2.9      | 1.1      | 27           | 0.2%         | -0.10 [-0.56, 0.36]         |  |
| Pope 2015                | 3.1   | 1.2      | 37           | 2.8      | 0.8      | 17           | 0.1%         | 0.30 [-0.24, 0.84]          |  |
| Pope 2015                | 2.8   | 1        | 267          | 3.3      | 1        | 18           | 0.2%         | -0.50 [-0.98, -0.02]        |  |
| Pope 2015                | 3.1   | 1.2      | 37           | 2.9      | 1.1      | 27           | 0.1%         | 0.20 [-0.37, 0.77]          |  |
| Pope 2015                | 2.8   | 1        | 267          | 2.8      | 0.8      | 17           | 0.2%         | 0.00 [-0.40, 0.40]          |  |
| Pope 2015                | 3.1   | 1.2      | 37           | 3.3      | 1        | 18           | 0.1%         | -0.20 [-0.80, 0.40]         |  |
| Pope 2015                | 2.8   | 0.9      | 77           | 2.8      | 0.8      | 17           | 0.2%         | 0.00 [-0.43, 0.43]          |  |
| Pope 2015                | 2.8   | 0.9      | 77           | 3.3      | 1        | 18           | 0.1%         | -0.50 [-1.00, 0.00]         |  |
| Rizk 2017                | 4     | 0.49     | 34           | 3.7      | 0.54     | 41           | 0.6%         | 0.30 [0.07, 0.53]           |  |
| Singelyn 1998            | 17    | 3        | 15           | 21       | 3        | 15           | 0.0%         | -4.00 [-6.15, -1.85]        |  |
| Spangehl 2015            | 2.84  | 1.34     | 79           | 2.44     | 0.65     | 81           | 0.3%         | 0.40 [0.07, 0.73]           |  |
| Suthersan 2015           | 4.9   | 1.7      | 22           | 2.7      | 1.2      | 24           | 0.0%         | 2.20 [1.34, 3.06]           |  |
| Tetsunaga 2016           | 19.7  | 2.6      | 30           | 19       | 2.4      | 32           | 0.0%         | 0.70 [-0.55, 1.95]          |  |
| Zhou 2018                | 21.2  | 1.6      | 20           | 21.3     | 1        | 20           | 0.1%         | -0.10 [-0.93, 0.73]         |  |
| Zhou 2018                | 20.6  | 0.8      | 20           | 21.3     | 1        | 20           | 0.1%         | -0.70 [-1.26, -0.14]        |  |
| <b>Subtotal (95% CI)</b> |       |          | <b>40917</b> |          |          | <b>40061</b> | <b>32.6%</b> | <b>-0.10 [-0.14, -0.07]</b> |  |

Heterogeneity: Chi<sup>2</sup> = 469.06, df = 38 (P < 0.00001); I<sup>2</sup> = 92%  
 Test for overall effect: Z = 6.29 (P < 0.00001)

1.101.2 GA only

|                |       |          |    |          |          |    |      |                      |  |
|----------------|-------|----------|----|----------|----------|----|------|----------------------|--|
| Angers 2019    | 6.2   | 2.1      | 45 | 6.1      | 3        | 45 | 0.0% | 0.10 [-0.97, 1.17]   |  |
| Antoni 2014    | 8.8   | 3.5      | 49 | 6.1      | 3.4      | 49 | 0.0% | 2.70 [1.33, 4.07]    |  |
| Bogoch 2002    | 7     | 2.9      | 57 | 8        | 3.3      | 58 | 0.0% | -1.00 [-2.13, 0.13]  |  |
| Fahs 2018      | 1.4   | 0.8      | 49 | 1.4      | 0.6      | 50 | 0.4% | 0.00 [-0.28, 0.28]   |  |
| Fan 2016       | 18.6  | 4.7      | 78 | 17.3     | 3.7      | 79 | 0.0% | 1.30 [-0.02, 2.62]   |  |
| Gasanova 2019  | 1.125 | 0.010417 | 30 | 1.783333 | 0.235417 | 30 | 4.9% | -0.66 [-0.74, -0.57] |  |
| Green 2018     | 2.9   | 1.3      | 10 | 5.1      | 2.2      | 10 | 0.0% | -2.20 [-3.78, -0.62] |  |
| Lee 2012       | 17.3  | 4        | 20 | 17.7     | 5.1      | 20 | 0.0% | -0.40 [-3.24, 2.44]  |  |
| Mei 2017       | 5.4   | 1        | 66 | 6.9      | 1.3      | 66 | 0.2% | -1.50 [-1.90, -1.10] |  |
| Ng 2001        | 8.8   | 3.4      | 12 | 8.8      | 2.9      | 12 | 0.0% | 0.00 [-2.53, 2.53]   |  |
| Ng 2001        | 9.5   | 3.4      | 12 | 8.8      | 2.9      | 12 | 0.0% | 0.70 [-1.83, 3.23]   |  |
| Ng 2001        | 9.3   | 3        | 12 | 8.8      | 2.9      | 12 | 0.0% | 0.50 [-1.86, 2.86]   |  |
| Rizk 2017      | 4     | 0.49     | 34 | 3.7      | 0.54     | 41 | 0.6% | 0.30 [0.07, 0.53]    |  |
| Spangehl 2015  | 2.84  | 1.34     | 79 | 2.44     | 0.65     | 81 | 0.3% | 0.40 [0.07, 0.73]    |  |
| Tetsunaga 2016 | 19.7  | 2.6      | 30 | 19       | 2.4      | 32 | 0.0% | 0.70 [-0.55, 1.95]   |  |
| Zhou 2018      | 21.2  | 1.6      | 20 | 21.3     | 1        | 20 | 0.1% | -0.10 [-0.93, 0.73]  |  |

## PNB versus no PNB for THA/TKA

23-Feb-2021

|                          |      |     |            |      |   |            |             |                             |
|--------------------------|------|-----|------------|------|---|------------|-------------|-----------------------------|
| Zhou 2018                | 20.6 | 0.8 | 20         | 21.3 | 1 | 20         | 0.1%        | -0.70 [-1.26, -0.14]        |
| <b>Subtotal (95% CI)</b> |      |     | <b>623</b> |      |   | <b>637</b> | <b>6.8%</b> | <b>-0.48 [-0.55, -0.41]</b> |

Heterogeneity:  $\text{Chi}^2 = 165.41$ ,  $\text{df} = 16$  ( $P < 0.00001$ );  $I^2 = 90\%$ Test for overall effect:  $Z = 13.15$  ( $P < 0.00001$ )

|                       |  |  |              |  |  |              |               |                             |
|-----------------------|--|--|--------------|--|--|--------------|---------------|-----------------------------|
| <b>Total (95% CI)</b> |  |  | <b>84423</b> |  |  | <b>81807</b> | <b>100.0%</b> | <b>-0.05 [-0.07, -0.03]</b> |
|-----------------------|--|--|--------------|--|--|--------------|---------------|-----------------------------|

Heterogeneity:  $\text{Chi}^2 = 1152.81$ ,  $\text{df} = 105$  ( $P < 0.00001$ );  $I^2 = 91\%$ Test for overall effect:  $Z = 5.14$  ( $P < 0.00001$ )Test for subgroup differences:  $\text{Chi}^2 = 198.38$ ,  $\text{df} = 3$  ( $P < 0.00001$ ),  $I^2 = 98.5\%$ Risk of bias legend

- (A) Random sequence generation (selection bias)
- (B) Allocation concealment (selection bias)
- (C) Blinding of participants and personnel (performance bias)
- (D) Blinding of outcome assessment (detection bias)
- (E) Incomplete outcome data (attrition bias)
- (F) Selective reporting (reporting bias)
- (G) Other bias
- (H) Observational Study: Failure to develop and apply appropriate eligibility criteria
- (I) Observational Study: Flawed measurement of exposure or outcome
- (J) Observational Study: Incomplete follow-up
- (K) Observational Study: Failure to adequately control for confounding
- (L) RCT: Selective outcome reporting
- (M) RCT: Sequence Generation
- (N) RCT: Other sources of bias
- (O) RCT: Blinding of outcome assessors
- (P) RCT: Blinding of participants and personnel
- (Q) RCT: Allocation concealment
- (R) RCT: Incomplete outcome data

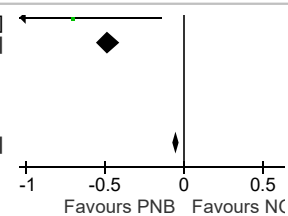

Supplement: inline-supplementary-material-4 [file inline-supplementary-material-4.pdf]
