# Supplementary material
Source: HighWire-hosted journal article supplement (https://rapm.bmj.com/content/rapm-2021-102750)
Supplement: inline-supplementary-material-1 [file inline-supplementary-material-1.pdf]

# Outcome Composition

Consensus: PNB vs. no PNB in THA/TKA

Atrial fibrillation

Blood loss (continuous)

Blood transfusion

Cardiac complication without MI (composite)

- Congestive heart failure
- Cardiac arrest
- Atrial fibrillation
- Cardiac complications, combined
- Arrhythmias (Not specified)
- Congestive heart failure

Cognitive dysfunction (composite)

- Delirium
- Dizziness
- Postoperative cognitive dysfunction
- Hypoxia and change in mental status

Critical care admission

Delirium

Gastrointestinal complications (composite)

- Ileus
- Constipation
- Gastrointestinal tract event
- GI-bleeding
- Gastric ulcer
- Gastrointestinal complications, combined

Hematoma

Infection

Infection (composite)

- Infection
- Urinary tract infection
- Pneumonia

Length of hospital stay (LOS)

Mortality

Myocardial infarction (MI)

Perioperative Nerve Injury

- Paresthesia
- Operative extremity neurologic changes

## Pneumonia

### Pulmonary complications (composite)

- Respiratory failure/depression
- Pulmonary complications, combined
- Re-intubation/mechanical ventilation
- Pneumonia
- Aspiration
- Atelectasis

## Readmission

### Renal complications (composite)

- Renal complications
- Acute renal failure
- Acute kidney injury

### Renal failure (composite)

- Acute renal failure
- Acute kidney injury

### Respiratory failure (composite)

- Respiratory failure/depression
- Re-intubation/mechanical ventilation

## Sepsis

## Stroke

- CVA cerebrovascular accidents/events
- Stroke
- TIA

## Surgical site infection

- Wound dehiscence
- Surgical site infection, deep
- Surgical site infection | cellulitis
- Wound complications
- Surgical site infection

## Thromboembolism (composite)

- Deep venous thrombosis
- Pulmonary embolism

## Urinary tract infection

## Search Strategy

### Impact of peripheral nerve block use versus non-peripheral nerve block

(Hip Arthroplasty OR Knee arthroplasty) AND Peripheral nerve AND humans NOT pediatrics—results

**PubMed – 5/11/18 – 1940**

**Embase – 5/11/18 – 7041**

**Cochrane – 5/11/18 – 1500**

**Total before deduplication 10481**

**Total to screen after deduplication**

#### Hip Arthroplasty – 53277 results

"Arthroplasty, Replacement, Hip"[Mesh]

OR (("arthroplasty"[TW] or "arthroplasties"[tw]) AND "replacement"[TW] AND "hip"[TW])

OR "hip replacement arthroplasty"[TW]

OR "hip replacement arthroplasties"[TW]

OR ("hip"[TW] AND "replacement"[TW])

OR "hip replacement"[TW]

OR "hip replacements"[TW]

OR ("total"[TW] AND "hip"[TW] AND ("arthroplasty"[TW] OR "arthroplasties"[TW]))

OR "total hip arthroplasty"[TW]

OR "total hip arthroplasties"[TW]

OR "THA"[TW]

OR "hip arthroplasty"[TW]

OR "hip arthroplasties"[TW]

OR ("hip"[TW] AND ("arthroplasty"[TW] OR "arthroplasties"[TW]))

OR "Hip Prosthesis"[Mesh]

OR "Hip Prosthesis"[tw]

OR "Hip Prostheses"[tw]

OR (("total joint replacement"[TW] OR "total joint replacements"[TW]) AND "hip"[tw])

OR ("TJR"[TW] AND "hip"[tw])

OR (("total joint arthroplasty"[TW] OR "total joint arthroplasties"[TW]) AND "hip"[tw])

OR ("TJA"[TW] AND "hip"[tw])

OR "total hip replacement"[TW]

OR "total hip replacements"[TW]

OR ("Arthroplasty"[Mesh] AND "Hip"[Mesh])

OR ("Arthroplasty, Replacement"[Mesh] AND "Hip"[Mesh])

OR "hip surgery"[tw]

OR ("alloarthroplasty"[tw] AND "hip"[tw])

#### Knee arthroplasty – 37962 results

"Arthroplasty, Replacement, Knee"[Mesh]

OR (("arthroplasty"[TW] or "arthroplasties"[tw]) AND "replacement"[TW] AND "knee"[TW])

OR "knee replacement arthroplasty"[TW]

OR "knee replacement arthroplasties"[TW]

OR ("knee"[TW] AND "replacement"[TW])

OR "knee replacement"[TW]

OR "knee replacements"[TW]

OR ("total"[TW] AND "knee"[TW] AND ("arthroplasty"[TW] OR "arthroplasties"[TW]))  
 OR "total knee arthroplasty"[TW]  
 OR "total knee arthroplasties"[TW]  
 OR "TKA"[TW]  
 OR "knee arthroplasty"[TW]  
 OR "knee arthroplasties"[TW]  
 OR ("knee"[TW] AND ("arthroplasty"[TW] OR "arthroplasties"[TW]))  
 OR "Knee Prosthesis"[Mesh]  
 OR "Knee Prosthesis"[tw]  
 OR "Knee Prostheses"[tw]  
 OR (("total joint replacement"[TW] OR "total joint replacements"[TW]) AND "knee"[tw])  
 OR ("TJR"[TW] AND "knee"[tw])  
 OR (("total joint arthroplasty"[TW] OR "total joint arthroplasties"[TW]) AND "knee"[tw])  
 OR ("TJA"[TW] AND "knee"[tw])  
 OR "total knee replacement"[TW]  
 OR "total knee replacements"[TW]  
 OR ("Arthroplasty"[Mesh] AND "Knee"[Mesh])  
 OR ("Arthroplasty, Replacement"[Mesh] AND "Knee"[Mesh])  
 OR ("knee surgery"[tw])  
 OR ("alloarthroplasty"[tw] AND "knee"[tw])

#### Lower Extremity Arthroplasty – 4365 Results

(("Lower Extremity"[Mesh] OR "Lower Extremity"[TW] OR "Lower Extremities"[TW]) AND  
 ("Arthroplasty"[Mesh] OR "Arthroplasty"[TW] OR "Arthroplasties"[TW]))  
 OR ("Lower joint"[TW] OR "Lower joints"[TW]) AND ("Arthroplasty"[Mesh] OR "Arthroplasty"[TW] OR  
 "Arthroplasties"[TW])  
 OR ("hip/knee"[tw] AND ("Arthroplasty"[Mesh] OR "Arthroplasty"[TW] OR "Arthroplasties"[TW]))  
 OR ("knee/hip"[tw] AND ("Arthroplasty"[Mesh] OR "Arthroplasty"[TW] OR "Arthroplasties"[TW]))

#### Peripheral nerve – 296149 results

("Anesthesia, Local"[Mesh]  
 OR "Anesthetics, Local"[Mesh]  
 OR "Anesthesia, Conduction"[Mesh]  
 OR "Nerve Block"[Mesh]  
 OR "Block\*"[tw]  
 OR "regional anesthesia"[tw]  
 OR "regional anaesthesia"[tw]  
 OR "regional Anesthetics"[tw]  
 OR "regional analgesia"[tw]  
 OR ("Anesthesia"[tw] AND "Conduction"[tw])  
 OR "local anesthesia"[tw]  
 OR "local anesthetics"[tw]  
 OR "local anaesthesia"[tw]  
 OR "local anesthetics"[tw]  
 OR "local analgesia"[tw]  
 OR (nerve AND Block\*)  
 OR "nerve Block"[tw]

OR "peripheral nerve block"[tw]  
OR ((psoas[TW] AND compartment[TW] AND (block\*[TW] OR catheter[tw]))  
OR "psoas compartment block"[TW])  
OR (("sciatic nerve"[MeSH Terms] OR ("sciatic"[TW] AND "nerve"[TW]) OR "sciatic nerve"[TW]) AND (block\*[TW] OR catheter[tw]))  
OR (Sciatic[TW] AND (anterior[TW] OR popliteal[tw] OR posterior[TW]))  
OR (("femoral nerve"[MeSH Terms] OR ("femoral"[TW] AND "nerve"[TW]) OR "femoral nerve"[TW]) AND (block\*[TW] OR catheter[tw]))  
OR (("3-in-1"[TW] OR "Three in One"[TW]) AND (block\*[TW] OR catheter[tw]))  
OR (Lateral[TW] AND ("femur"[MeSH Terms] OR "femur"[TW] OR "femoral"[TW]) AND cutaneous[TW] AND nerve[TW])  
OR (("fascia"[MeSH Terms] OR "fascia"[TW]) AND iliaca[TW] AND compartment[TW] AND (block\*[TW] OR catheter[tw]))  
OR "Fascia iliaca compartment block"[TW]  
OR (("fascia"[MeSH Terms] OR "fascia"[TW]) AND iliaca[TW] AND (block\*[TW] OR catheter[tw])) OR "Fascia iliaca block"[TW])  
OR (("obturator nerve"[MeSH Terms] OR ("obturator"[TW] AND "nerve"[TW]) OR "obturator nerve"[TW]) AND (block\*[TW] OR catheter[tw]))  
OR (Quadratus[TW] AND lumborum[TW] AND (block\*[TW] OR catheter[tw]))  
OR (("lumbosacral region"[MeSH Terms] OR ("lumbosacral"[TW] AND "region"[TW]) OR "lumbosacral region"[TW] OR ("lumbar"[TW] AND paravertebral[TW])) AND (block\*[TW] OR catheter[tw]))  
OR (("lumbosacral plexus"[MeSH Terms] OR ("lumbosacral"[TW] AND "plexus"[TW]) OR "lumbosacral plexus"[TW] OR ("lumbar"[TW] AND "plexus"[TW]) OR "lumbar plexus"[TW]) AND (block\*[TW] OR catheter[tw]))  
OR (saphenous[tw] AND ("nerve block"[MeSH Terms] OR ("nerve"[tw] AND "block"[tw]) OR "nerve block"[tw]))  
OR (adductor[tw] AND "canal"[tw]) AND (block\*[TW] OR catheter[tw]))  
OR ("local"[TW] AND "anesthetic"[TW] AND infiltration[TW])  
OR "local anesthetic infiltration"[TW]  
OR ("local"[TW] AND infiltration[TW]) OR "local infiltration"[TW]  
OR "IPACK"[tw]  
OR "popliteal artery and capsule of the knee"[tw]  
OR "iliac crest infiltration"[tw]  
OR "perineural"[tw]  
OR ("nerve"[tw] AND ("catheters"[tw] OR "catheter"[tw]))  
OR ("nerve"[tw] AND "analgesia"[tw])  
OR ("catheter"[tw] AND "analgesia"[tw])  
OR ("femoral"[tw] AND ("catheters"[tw] OR "catheter"[tw]))  
OR ("Sciatic"[tw] AND ("catheters"[tw] OR "catheter"[tw]))  
OR ("obturator"[tw] AND ("catheters"[tw] OR "catheter"[tw]))  
OR ("Lateral"[tw] AND "femoral"[tw] AND "cutaneous" AND ("catheters"[tw] OR "catheter"[tw]))  
OR ("Lateral cutaneous"[tw] AND ("catheters"[tw] OR "catheter"[tw]))  
OR ("Fascia iliaca"[tw] AND ("catheters"[tw] OR "catheter"[tw]))  
OR (iliaca\*[tw] AND ("catheters"[tw] OR "catheter"[tw]))  
OR ("Paravertebral"[tw] AND block\*[tw])  
OR ("Paravertebral"[tw] AND ("catheters"[tw] OR "catheter"[tw]))  
OR ("Saphenous"[tw] AND ("catheters"[tw] OR "catheter"[tw]))

OR ("Lumbosacral"[tw] AND ("catheters"[tw] OR "catheter"[tw])) OR ("Lumbosacral"[tw] AND block\*[tw]) OR ("Psoas"[tw] AND ("catheters"[tw] OR "catheter"[tw]))  
OR ("lumbar"[tw] AND ("catheters"[tw] OR "catheter"[tw]))  
OR ("lumbar"[tw] AND "Plexus"[tw] AND ("catheters"[tw] OR "catheter"[tw]))  
OR (selective[tw] AND ("tibia"[MeSH Terms] OR "tibia"[tw] OR "tibial"[tw]) AND block[tw]))

**2164 Results****NOT Pediatrics 2017**

"adolescent"[MeSH]  
OR "adolescent"[TW]  
OR "adolescents"[TW]  
OR "youth"[TW]  
OR "child"[MeSH]  
OR "child"[TW]  
OR "children"[TW]  
OR "teenager"[TW]  
OR "teenagers"[TW]  
OR "infant"[MeSH]  
OR "infant"[TW]  
OR "infants"[TW]  
OR "pediatrics"[MeSH]  
OR "pediatrics"[TW]  
OR "pediatric"[TW]  
OR "paediatric"[TW]  
OR "paediatrics"[TW]  
OR "juvenile"[TW]  
OR "high school"[tw]  
OR "immature"[tw]

NOT (animals[mesh] NOT humans[mesh]) 1940

**EMBASE**

Hip Arthroplasty 72,895

'hip arthroplasty'/exp

OR ((arthroplasty:ti,ab,de,tn,kw OR arthroplasties:ti,ab,de,tn,kw) AND replacement:ti,ab,de,tn,kw AND

hip:ti,ab,de,tn,kw)  
OR "hip replacement arthroplasty":ti,ab,de,tn,kw  
OR "hip replacement arthroplasties":ti,ab,de,tn,kw  
OR (hip:ti,ab,de,tn,kw AND replacement:ti,ab,de,tn,kw)  
OR "hip replacement":ti,ab,de,tn,kw  
OR "hip replacements":ti,ab,de,tn,kw  
OR (total:ti,ab,de,tn,kw AND hip:ti,ab,de,tn,kw AND (arthroplasty:ti,ab,de,tn,kw OR arthroplasties:ti,ab,de,tn,kw))  
OR "total hip arthroplasty":ti,ab,de,tn,kw  
OR "total hip arthroplasties":ti,ab,de,tn,kw  
OR THA:ti,ab,de,tn,kw  
OR "hip arthroplasty":ti,ab,de,tn,kw  
OR "hip arthroplasties":ti,ab,de,tn,kw  
OR 'total hip prosthesis'/exp  
OR (hip:ti,ab,de,tn,kw AND (arthroplasty:ti,ab,de,tn,kw OR arthroplasties:ti,ab,de,tn,kw))  
OR 'hip prosthesis'/exp  
OR "Hip Prosthesis":ti,ab,de,tn,kw  
OR "Hip Prostheses":ti,ab,de,tn,kw  
OR (("total joint replacement":ti,ab,de,tn,kw OR "total joint replacements":ti,ab,de,tn,kw) AND hip:ti,ab,de,tn,kw)  
OR (TJR:ti,ab,de,tn,kw AND hip:ti,ab,de,tn,kw)  
OR (("total joint arthroplasty":ti,ab,de,tn,kw OR "total joint arthroplasties":ti,ab,de,tn,kw) AND hip:ti,ab,de,tn,kw)  
OR (TJA:ti,ab,de,tn,kw AND hip:ti,ab,de,tn,kw)  
OR "total hip replacement":ti,ab,de,tn,kw  
OR "total hip replacements":ti,ab,de,tn,kw  
OR ('Arthroplasty'/exp AND 'Hip'/exp)  
OR 'hip replacement'/exp  
OR ('replacement arthroplasty'/exp AND 'Hip'/exp)  
OR 'hip surgery'/exp  
OR "hip surgery":ti,ab,de,tn,kw  
OR (alloarthroplasty:ti,ab,de,tn,kw AND hip:ti,ab,de,tn,kw)

Knee arthroplasty 65,283

'knee replacement'/exp  
OR 'knee arthroplasty'/exp  
OR ((arthroplasty:ti,ab,de,tn,kw OR arthroplasties:ti,ab,de,tn,kw) AND replacement:ti,ab,de,tn,kw AND knee:ti,ab,de,tn,kw)  
OR "knee replacement arthroplasty":ti,ab,de,tn,kw  
OR "knee replacement arthroplasties":ti,ab,de,tn,kw  
OR (knee:ti,ab,de,tn,kw AND replacement:ti,ab,de,tn,kw)  
OR "knee replacement":ti,ab,de,tn,kw  
OR "knee replacements":ti,ab,de,tn,kw  
OR 'total knee arthroplasty'/exp  
OR ('total arthroplasty'/exp AND 'knee'/exp)  
OR (total:ti,ab,de,tn,kw AND knee:ti,ab,de,tn,kw AND (arthroplasty:ti,ab,de,tn,kw OR arthroplasties:ti,ab,de,tn,kw))

OR "total knee arthroplasty":ti,ab,de,tn,kw  
 OR "total knee arthroplasties":ti,ab,de,tn,kw  
 OR TKA:ti,ab,de,tn,kw  
 OR "knee arthroplasty":ti,ab,de,tn,kw  
 OR "knee arthroplasties":ti,ab,de,tn,kw  
 OR (knee:ti,ab,de,tn,kw AND (arthroplasty:ti,ab,de,tn,kw OR arthroplasties:ti,ab,de,tn,kw))  
 OR 'Knee Prosthesis'/exp  
 OR "Knee Prosthesis":ti,ab,de,tn,kw  
 OR "Knee Prostheses":ti,ab,de,tn,kw  
 OR ("total joint replacement":ti,ab,de,tn,kw OR "total joint replacements":ti,ab,de,tn,kw) AND knee:ti,ab,de,tn,kw  
 OR (TJR:ti,ab,de,tn,kw AND knee:ti,ab,de,tn,kw)  
 OR ("total joint arthroplasty":ti,ab,de,tn,kw OR "total joint arthroplasties":ti,ab,de,tn,kw) AND knee:ti,ab,de,tn,kw  
 OR (TJA:ti,ab,de,tn,kw AND knee:ti,ab,de,tn,kw)  
 OR "total knee replacement":ti,ab,de,tn,kw  
 OR "total knee replacements":ti,ab,de,tn,kw  
 OR ('Arthroplasty'/exp AND 'Knee'/exp)  
 OR ('Arthroplasty, Replacement'/exp AND 'Knee'/exp)  
 OR 'knee surgery'/exp  
 OR ("knee surgery":ti,ab,de,tn,kw)  
 OR (alloarthroplasty:ti,ab,de,tn,kw AND knee:ti,ab,de,tn,kw)

Lower Extremity Arthroplasty 20,220

(('Lower limb'/exp OR "Lower Extremity":ti,ab,de,tn,kw OR "Lower Extremities":ti,ab,de,tn,kw OR "Lower limb":ti,ab,de,tn,kw OR "Lower limbs":ti,ab,de,tn,kw) AND ('Arthroplasty'/exp OR Arthroplasty:ti,ab,de,tn,kw OR Arthroplasties:ti,ab,de,tn,kw))  
 OR ("Lower joint":ti,ab,de,tn,kw OR "Lower joints":ti,ab,de,tn,kw) AND ('Arthroplasty'/exp OR Arthroplasty:ti,ab,de,tn,kw OR Arthroplasties:ti,ab,de,tn,kw)  
 OR (hip-knee:ti,ab,de,tn,kw AND ('Arthroplasty'/exp OR Arthroplasty:ti,ab,de,tn,kw OR Arthroplasties:ti,ab,de,tn,kw))  
 OR (knee-hip:ti,ab,de,tn,kw AND ('Arthroplasty'/exp OR Arthroplasty:ti,ab,de,tn,kw OR Arthroplasties:ti,ab,de,tn,kw)) combined 124,517

Peripheral nerve 1,402,814

('local anesthesia'/exp  
 OR 'local anesthetic agent'/exp  
 OR 'regional anesthesia'/exp  
 OR 'nerve block'/exp  
 OR block\*:ti,ab,de,tn,kw  
 OR 'regional anesthesia':ti,ab,de,tn,kw  
 OR 'regional anaesthesia':ti,ab,de,tn,kw  
 OR 'regional anesthetics':ti,ab,de,tn,kw  
 OR 'regional analgesia':ti,ab,de,tn,kw  
 OR 'local anesthesia':ti,ab,de,tn,kw  
 OR 'local anesthetics':ti,ab,de,tn,kw  
 OR 'local anaesthesia':ti,ab,de,tn,kw)



OR 'local anesthetics':ti,ab,de,tn,kw  
OR 'local analgesia':ti,ab,de,tn,kw  
OR ('nerve' AND 'block\*') OR 'nerve block':ti,ab,de,tn,kw  
OR 'peripheral nerve block':ti,ab,de,tn,kw  
OR (psoas AND compartment AND (block OR catheter)) OR 'psoas compartment block'/exp  
OR (('sciatic nerve'/exp OR (sciatic:ti,ab,de,tn,kw AND nerve:ti,ab,de,tn,kw))  
OR 'sciatic nerve':ti,ab,de,tn,kw) AND (block\*:ti,ab,de,tn,kw OR catheter:ti,ab,de,tn,kw))  
OR (sciatic:ti,ab,de,tn,kw AND (anterior:ti,ab,de,tn,kw OR popliteal:ti,ab,de,tn,kw OR  
posterior:ti,ab,de,tn,kw))  
OR (('femoral nerve'/exp OR (femoral:ti,ab,de,tn,kw AND nerve:ti,ab,de,tn,kw) OR 'femoral  
nerve':ti,ab,de,tn,kw) AND (block\*:ti,ab,de,tn,kw OR catheter:ti,ab,de,tn,kw))  
OR (('3 in 1':ti,ab,de,tn,kw OR 'three in one':ti,ab,de,tn,kw) AND (block\*:ti,ab,de,tn,kw OR  
catheter:ti,ab,de,tn,kw))  
OR (lateral:ti,ab,de,tn,kw AND ('femur'/exp OR femur:ti,ab,de,tn,kw OR femoral:ti,ab,de,tn,kw) AND  
cutaneous:ti,ab,de,tn,kw AND nerve:ti,ab,de,tn,kw)  
OR (('fascia'/exp OR fascia:ti,ab,de,tn,kw) AND iliaca:ti,ab,de,tn,kw AND compartment:ti,ab,de,tn,kw  
AND (block\*:ti,ab,de,tn,kw OR catheter:ti,ab,de,tn,kw))  
OR 'fascia iliaca compartment block':ti,ab,de,tn,kw  
OR (('fascia'/exp OR fascia:ti,ab,de,tn,kw) AND iliaca:ti,ab,de,tn,kw AND (block\*:ti,ab,de,tn,kw OR  
catheter:ti,ab,de,tn,kw))  
OR 'fascia iliaca block':ti,ab,de,tn,kw  
OR (('obturator nerve'/exp OR (obturator:ti,ab,de,tn,kw AND nerve:ti,ab,de,tn,kw) OR 'obturator  
nerve':ti,ab,de,tn,kw) AND (block\*:ti,ab,de,tn,kw OR catheter:ti,ab,de,tn,kw))  
OR (('lumbosacral region'/exp OR (lumbosacral:ti,ab,de,tn,kw AND region:ti,ab,de,tn,kw) OR  
'lumbosacral region':ti,ab,de,tn,kw OR (lumbar:ti,ab,de,tn,kw AND paravertebral:ti,ab,de,tn,kw)) AND  
(block\*:ti,ab,de,tn,kw OR catheter:ti,ab,de,tn,kw))  
OR (('lumbosacral plexus'/exp OR (lumbosacral:ti,ab,de,tn,kw AND plexus:ti,ab,de,tn,kw) OR  
'lumbosacral plexus':ti,ab,de,tn,kw OR (lumbar:ti,ab,de,tn,kw AND plexus:ti,ab,de,tn,kw) OR 'lumbar  
plexus':ti,ab,de,tn,kw) AND (block\*:ti,ab,de,tn,kw OR catheter:ti,ab,de,tn,kw))  
OR ('saphenous':ti,ab,de,tn,kw AND ('nerve block'/exp OR ('nerve':ti,ab,de,tn,kw AND  
'block':ti,ab,de,tn,kw) OR 'nerve block':ti,ab,de,tn,kw))  
OR (local:ti,ab,de,tn,kw AND anesthetic:ti,ab,de,tn,kw AND infiltration:ti,ab,de,tn,kw)  
OR 'local anesthetic infiltration':ti,ab,de,tn,kw  
OR (local:ti,ab,de,tn,kw AND infiltration:ti,ab,de,tn,kw)  
OR 'local infiltration':ti,ab,de,tn,kw  
OR ipack:ti,ab,de,tn,kw  
OR 'popliteal artery and capsule of the knee':ti,ab,de,tn,kw  
OR 'iliac crest infiltration':ti,ab,de,tn,kw OR perineural:ti,ab,de,tn,kw  
OR (nerve:ti,ab,de,tn,kw AND (catheters:ti,ab,de,tn,kw OR catheter:ti,ab,de,tn,kw))  
OR (nerve:ti,ab,de,tn,kw AND analgesia:ti,ab,de,tn,kw) OR (catheter:ti,ab,de,tn,kw AND  
analgesia:ti,ab,de,tn,kw)  
OR (femoral:ti,ab,de,tn,kw AND (catheters:ti,ab,de,tn,kw OR catheter:ti,ab,de,tn,kw))  
OR (sciatic:ti,ab,de,tn,kw AND (catheters:ti,ab,de,tn,kw OR catheter:ti,ab,de,tn,kw))  
OR (obturator:ti,ab,de,tn,kw AND (catheters:ti,ab,de,tn,kw OR catheter:ti,ab,de,tn,kw))  
OR (lateral:ti,ab,de,tn,kw AND femoral:ti,ab,de,tn,kw AND cutaneous AND (catheters:ti,ab,de,tn,kw OR  
catheter:ti,ab,de,tn,kw))  
OR ('lateral cutaneous':ti,ab,de,tn,kw AND (catheters:ti,ab,de,tn,kw OR catheter:ti,ab,de,tn,kw))  
OR ('fascia iliaca':ti,ab,de,tn,kw AND (catheters:ti,ab,de,tn,kw OR catheter:ti,ab,de,tn,kw))

OR (iliaca\*:ti,ab,de,tn,kw AND (catheters:ti,ab,de,tn,kw OR catheter:ti,ab,de,tn,kw))  
OR (paravertebral:ti,ab,de,tn,kw AND block\*:ti,ab,de,tn,kw) OR (paravertebral:ti,ab,de,tn,kw AND (catheters:ti,ab,de,tn,kw OR catheter:ti,ab,de,tn,kw))  
OR (saphenous:ti,ab,de,tn,kw AND (catheters:ti,ab,de,tn,kw OR catheter:ti,ab,de,tn,kw))  
OR (lumbosacral:ti,ab,de,tn,kw AND (catheters:ti,ab,de,tn,kw OR catheter:ti,ab,de,tn,kw))  
OR (lumbosacral:ti,ab,de,tn,kw AND block\*:ti,ab,de,tn,kw)  
OR (psoas:ti,ab,de,tn,kw AND (catheters:ti,ab,de,tn,kw OR catheter:ti,ab,de,tn,kw))  
OR (lumbar:ti,ab,de,tn,kw AND (catheters:ti,ab,de,tn,kw OR catheter:ti,ab,de,tn,kw))  
OR (lumbar:ti,ab,de,tn,kw AND plexus:ti,ab,de,tn,kw AND (catheters:ti,ab,de,tn,kw OR catheter:ti,ab,de,tn,kw))  
OR (selective:ti,ab,de,tn,kw AND ('tibia'/exp OR tibia:ti,ab,de,tn,kw OR tibial:ti,ab,de,tn,kw) AND block:ti,ab,de,tn,kw))

#### **(THA OR TKA OR LE) AND peripheral nerve 7742**

NOT Pediatrics 7311  
'adolescent'/exp  
OR adolescent:ti,ab,de,tn,kw  
OR adolescents:ti,ab,de,tn,kw  
OR youth:ti,ab,de,tn,kw  
OR 'child'/exp  
OR child:ti,ab,de,tn,kw  
OR children:ti,ab,de,tn,kw  
OR teenager:ti,ab,de,tn,kw  
OR teenagers:ti,ab,de,tn,kw  
OR 'infant'/exp  
OR infant:ti,ab,de,tn,kw  
OR infants:ti,ab,de,tn,kw  
OR 'pediatrics'/exp  
OR pediatrics:ti,ab,de,tn,kw  
OR pediatric:ti,ab,de,tn,kw  
OR paediatric:ti,ab,de,tn,kw  
OR paediatrics:ti,ab,de,tn,kw  
OR 'juvenile'/exp  
OR juvenile:ti,ab,de,tn,kw  
OR 'high school'/exp  
OR "high school":ti,ab,de,tn,kw  
OR immature:ti,ab,de,tn,kw

NOT ('animal'/exp NOT 'human'/exp) 7041

COCHRANE  
Hip Arthroplasty – 5886

[mh "Arthroplasty, Replacement, Hip"]  
OR ((arthroplasty:ti,ab,kw OR arthroplasties:ti,ab,kw) AND replacement:ti,ab,kw AND hip:ti,ab,kw)  
OR "hip replacement arthroplasty":ti,ab,kw  
OR "hip replacement arthroplasties":ti,ab,kw  
OR (hip:ti,ab,kw AND replacement:ti,ab,kw)  
OR "hip replacement":ti,ab,kw  
OR "hip replacements":ti,ab,kw  
OR (total:ti,ab,kw AND hip:ti,ab,kw AND (arthroplasty:ti,ab,kw OR arthroplasties:ti,ab,kw))  
OR "total hip arthroplasty":ti,ab,kw  
OR "total hip arthroplasties":ti,ab,kw  
OR THA:ti,ab,kw  
OR "hip arthroplasty":ti,ab,kw  
OR "hip arthroplasties":ti,ab,kw  
OR (hip:ti,ab,kw AND (arthroplasty:ti,ab,kw OR arthroplasties:ti,ab,kw))  
OR [mh "Hip Prosthesis"]  
OR "Hip Prosthesis":ti,ab,kw  
OR "Hip Prostheses":ti,ab,kw  
OR (("total joint replacement":ti,ab,kw OR "total joint replacements":ti,ab,kw) AND hip:ti,ab,kw)  
OR (TJR:ti,ab,kw AND hip:ti,ab,kw)  
OR (("total joint arthroplasty":ti,ab,kw OR "total joint arthroplasties":ti,ab,kw) AND hip:ti,ab,kw)  
OR (TJA:ti,ab,kw AND hip:ti,ab,kw)  
OR "total hip replacement":ti,ab,kw  
OR "total hip replacements":ti,ab,kw  
OR ([mh Arthroplasty] AND [mh Hip])  
OR ([mh "Arthroplasty, Replacement"] AND [mh Hip])  
OR "hip surgery":ti,ab,kw  
OR (alloarthroplasty:ti,ab,kw AND hip:ti,ab,kw)

#### Knee arthroplasty 5906

[mh "Arthroplasty, Replacement, Knee"]  
OR ((arthroplasty:ti,ab,kw OR arthroplasties:ti,ab,kw) AND replacement:ti,ab,kw AND knee:ti,ab,kw)  
OR "knee replacement arthroplasty":ti,ab,kw  
OR "knee replacement arthroplasties":ti,ab,kw  
OR (knee:ti,ab,kw AND replacement:ti,ab,kw)  
OR "knee replacement":ti,ab,kw  
OR "knee replacements":ti,ab,kw  
OR (total:ti,ab,kw AND knee:ti,ab,kw AND (arthroplasty:ti,ab,kw OR arthroplasties:ti,ab,kw))  
OR "total knee arthroplasty":ti,ab,kw  
OR "total knee arthroplasties":ti,ab,kw  
OR TKA:ti,ab,kw  
OR "knee arthroplasty":ti,ab,kw  
OR "knee arthroplasties":ti,ab,kw  
OR (knee:ti,ab,kw AND (arthroplasty:ti,ab,kw OR arthroplasties:ti,ab,kw))  
OR [mh "Knee Prosthesis"]  
OR "Knee Prosthesis":ti,ab,kw  
OR "Knee Prostheses":ti,ab,kw

OR ("total joint replacement":ti,ab,kw OR "total joint replacements":ti,ab,kw) AND knee:ti,ab,kw  
 OR (TJR:ti,ab,kw AND knee:ti,ab,kw)  
 OR ("total joint arthroplasty":ti,ab,kw OR "total joint arthroplasties":ti,ab,kw) AND knee:ti,ab,kw  
 OR (TJA:ti,ab,kw AND knee:ti,ab,kw)  
 OR "total knee replacement":ti,ab,kw  
 OR "total knee replacements":ti,ab,kw  
 OR ([mh Arthroplasty] AND [mh Knee])  
 OR ([mh "Arthroplasty, Replacement"] AND [mh Knee])  
 OR ("knee surgery":ti,ab,kw)  
 OR (alloarthroplasty:ti,ab,kw AND knee:ti,ab,kw)

#### Lower Extremity Arthroplasty 385

(([mh "Lower Extremity"] OR "Lower Extremity":ti,ab,kw OR "Lower Extremities":ti,ab,kw) AND ([mh Arthroplasty] OR Arthroplasty:ti,ab,kw OR Arthroplasties:ti,ab,kw))  
 OR ("Lower joint":ti,ab,kw OR "Lower joints":ti,ab,kw) AND ([mh Arthroplasty] OR Arthroplasty:ti,ab,kw OR Arthroplasties:ti,ab,kw)  
 OR (hip-knee:ti,ab,kw AND ([mh Arthroplasty] OR Arthroplasty:ti,ab,kw OR Arthroplasties:ti,ab,kw))  
 OR (knee-hip:ti,ab,kw AND ([mh Arthroplasty] OR Arthroplasty:ti,ab,kw OR Arthroplasties:ti,ab,kw))

#### Peripheral nerve - 65,893

[mh "Anesthesia, Local"]  
 OR [mh "Anesthetics, Local"]  
 OR [mh "Anesthesia, Conduction"]  
 OR [mh "Nerve Block"]  
 OR Block\*:ti,ab,kw  
 OR "regional anesthesia":ti,ab,kw  
 OR "regional anaesthesia":ti,ab,kw  
 OR "regional Anesthetics":ti,ab,kw  
 OR "regional analgesia":ti,ab,kw  
 OR (Anesthesia:ti,ab,kw AND Conduction:ti,ab,kw)  
 OR "local anesthesia":ti,ab,kw  
 OR "local anesthetics":ti,ab,kw  
 OR "local anaesthesia":ti,ab,kw  
 OR "local anesthetics":ti,ab,kw  
 OR "local analgesia":ti,ab,kw  
 OR (nerve AND Block\*)  
 OR "nerve Block":ti,ab,kw  
 OR "peripheral nerve block":ti,ab,kw  
 ("psoas":ti,ab,kw AND "compartment":ti,ab,kw AND (block\*:ti,ab,kw OR catheter:ti,ab,kw))  
 OR "psoas compartment block":ti,ab,kw  
 OR (([mh "sciatic nerve"] OR ("sciatic":ti,ab,kw AND "nerve":ti,ab,kw) OR "sciatic nerve":ti,ab,kw) AND (block\*:ti,ab,kw OR catheter:ti,ab,kw))  
 OR (Sciatic:ti,ab,kw AND (anterior:ti,ab,kw OR popliteal:ti,ab,kw OR posterior:ti,ab,kw))  
 OR (([mh "femoral nerve"] OR (femoral:ti,ab,kw AND nerve:ti,ab,kw) OR "femoral nerve":ti,ab,kw) AND (block\*:ti,ab,kw OR catheter:ti,ab,kw))  
 OR ("3-in-1":ti,ab,kw OR "Three in One":ti,ab,kw) AND (block\*:ti,ab,kw OR catheter:ti,ab,kw))

OR (Lateral:ti,ab,kw AND ([mh "femur"] OR femur:ti,ab,kw OR femoral:ti,ab,kw) AND cutaneous:ti,ab,kw AND nerve:ti,ab,kw)  
 OR ((([mh "fascia"] OR fascia:ti,ab,kw) AND iliaca:ti,ab,kw AND compartment:ti,ab,kw AND (block\*:ti,ab,kw OR catheter:ti,ab,kw))  
 OR "Fascia iliaca compartment block":ti,ab,kw  
 OR ((([mh "fascia"] OR fascia:ti,ab,kw) AND iliaca:ti,ab,kw AND (block\*:ti,ab,kw OR catheter:ti,ab,kw)) OR "Fascia iliaca block":ti,ab,kw  
 OR ((([mh "obturator nerve"] OR (obturator:ti,ab,kw AND nerve:ti,ab,kw) OR "obturator nerve":ti,ab,kw) AND (block\*:ti,ab,kw OR catheter:ti,ab,kw))  
 OR (Quadratus:ti,ab,kw AND lumborum:ti,ab,kw AND (block\*:ti,ab,kw OR catheter:ti,ab,kw))  
 OR ((([mh "lumbosacral region"] OR (lumbosacral:ti,ab,kw AND region:ti,ab,kw) OR "lumbosacral region":ti,ab,kw OR (lumbar:ti,ab,kw AND paravertebral:ti,ab,kw)) AND (block\*:ti,ab,kw OR catheter:ti,ab,kw))  
 OR ((([mh "lumbosacral plexus"] OR (lumbosacral:ti,ab,kw AND plexus:ti,ab,kw) OR "lumbosacral plexus":ti,ab,kw OR (lumbar:ti,ab,kw AND plexus:ti,ab,kw) OR "lumbar plexus":ti,ab,kw) AND (block\*:ti,ab,kw OR catheter:ti,ab,kw))  
 OR (saphenous:ti,ab,kw AND ([mh "nerve block"] OR (nerve:ti,ab,kw AND block:ti,ab,kw) OR "nerve block":ti,ab,kw))  
 OR (adductor:ti,ab,kw AND canal:ti,ab,kw AND (block\*:ti,ab,kw OR catheter:ti,ab,kw))  
 OR (local:ti,ab,kw AND anesthetic:ti,ab,kw AND infiltration:ti,ab,kw)  
 OR "local anesthetic infiltration":ti,ab,kw  
 OR (local:ti,ab,kw AND infiltration:ti,ab,kw) OR "local infiltration":ti,ab,kw  
 OR "IPACK":ti,ab,kw  
 OR "popliteal artery and capsule of the knee":ti,ab,kw  
 OR "iliac crest infiltration":ti,ab,kw  
 OR perineural:ti,ab,kw  
 OR (nerve:ti,ab,kw AND (catheters:ti,ab,kw OR catheter:ti,ab,kw))  
 OR (nerve:ti,ab,kw AND analgesia:ti,ab,kw)  
 OR (catheter:ti,ab,kw AND analgesia:ti,ab,kw)  
 OR (femoral:ti,ab,kw AND (catheters:ti,ab,kw OR catheter:ti,ab,kw))  
 OR (Sciatic:ti,ab,kw AND (catheters:ti,ab,kw OR catheter:ti,ab,kw))  
 OR (obturator:ti,ab,kw AND (catheters:ti,ab,kw OR catheter:ti,ab,kw))  
 OR (Lateral:ti,ab,kw AND femoral:ti,ab,kw AND cutaneous AND (catheters:ti,ab,kw OR catheter:ti,ab,kw))  
 OR ("Lateral cutaneous":ti,ab,kw AND (catheters:ti,ab,kw OR catheter:ti,ab,kw))  
 OR ("Fascia iliaca":ti,ab,kw AND (catheters:ti,ab,kw OR catheter:ti,ab,kw))  
 OR (iliaca\*:ti,ab,kw AND (catheters:ti,ab,kw OR catheter:ti,ab,kw))  
 OR (Paravertebral:ti,ab,kw AND block\*:ti,ab,kw)  
 OR (Paravertebral:ti,ab,kw AND (catheters:ti,ab,kw OR catheter:ti,ab,kw))  
 OR (Saphenous:ti,ab,kw AND (catheters:ti,ab,kw OR catheter:ti,ab,kw))  
 OR (Lumbosacral:ti,ab,kw AND (catheters:ti,ab,kw OR catheter:ti,ab,kw))  
 OR (Lumbosacral:ti,ab,kw AND block\*:ti,ab,kw)  
 OR (Psoas:ti,ab,kw AND (catheters:ti,ab,kw OR catheter:ti,ab,kw))  
 OR (lumbar:ti,ab,kw AND (catheters:ti,ab,kw OR catheter:ti,ab,kw))  
 OR (lumbar:ti,ab,kw AND Plexus:ti,ab,kw AND (catheters:ti,ab,kw OR catheter:ti,ab,kw))  
 OR (selective:ti,ab,kw AND ([mh "tibia"] OR tibia:ti,ab,kw OR tibial:ti,ab,kw) AND block:ti,ab,kw)

**(THA OR TKA OR LE) AND peripheral nerve 1645**

NOT Pediatrics – 1542

[mh adolescent]

OR adolescent:ti,ab,kw

OR adolescents:ti,ab,kw

OR youth:ti,ab,kw

OR [mh child]

OR child:ti,ab,kw

OR children:ti,ab,kw

OR teenager:ti,ab,kw

OR teenagers:ti,ab,kw

OR [mh infant]

OR infant:ti,ab,kw

OR infants:ti,ab,kw

OR [mh pediatrics]

OR pediatrics:ti,ab,kw

OR pediatric:ti,ab,kw

OR paediatric:ti,ab,kw

OR paediatrics:ti,ab,kw

OR juvenile:ti,ab,kw

OR "high school":ti,ab,kw

OR immature:ti,ab,kw

NOT ([mh animals] NOT [mh humans]) 1540

Filtered out all reviews: Final count 1500
